# Supplementary material
Source: PubMed Central journal article supplement (PMC8763427)

**Figure E2(A) Forest plots of immunological parameters in severe and non-severe patients of COVID-19**

**(1) IL-1 $\beta$**

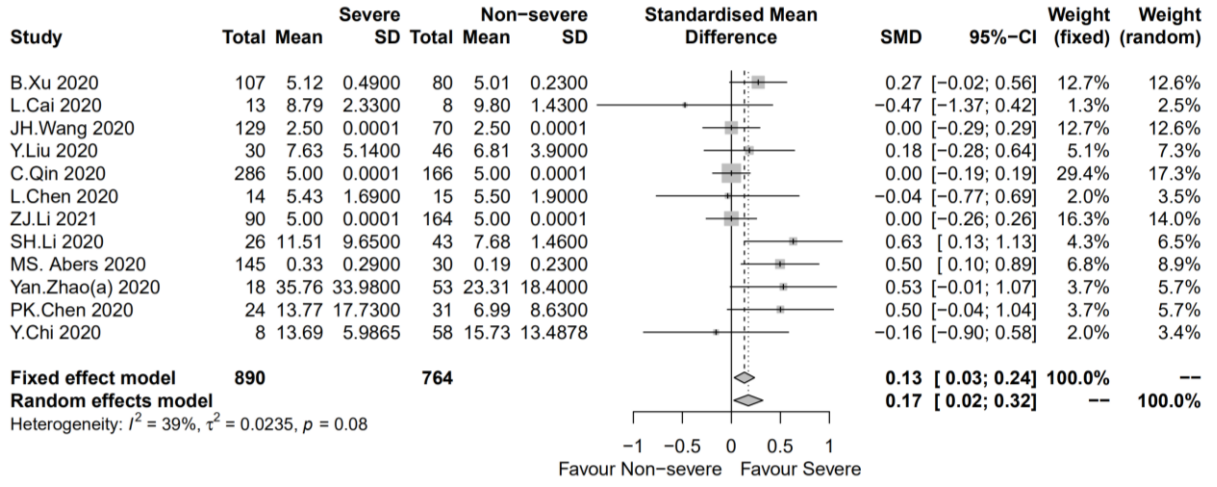

**(2) IL-1Ra**

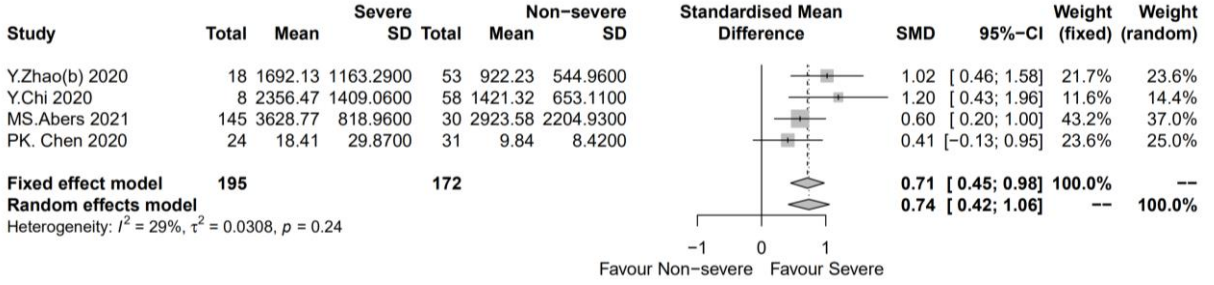

**(3) IL-2**

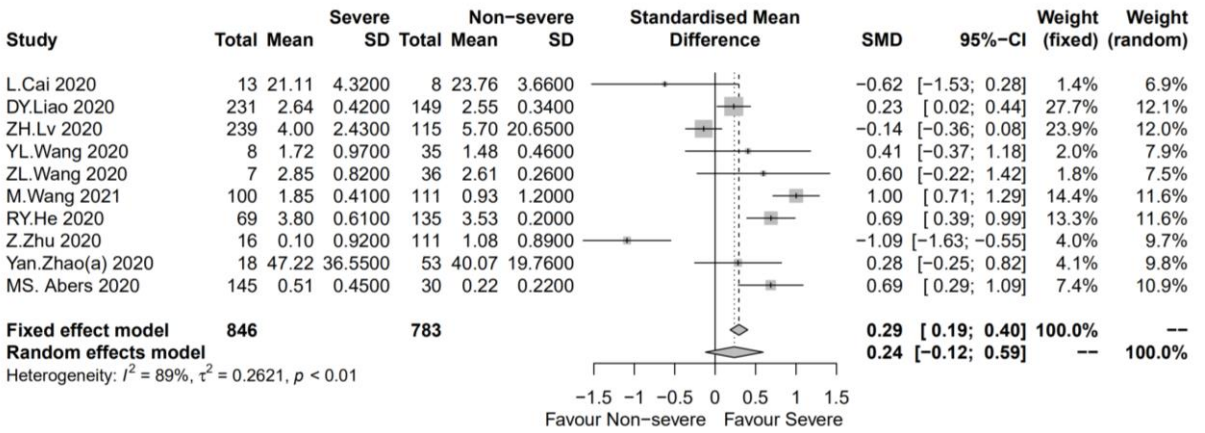

**(4) IL-2R**

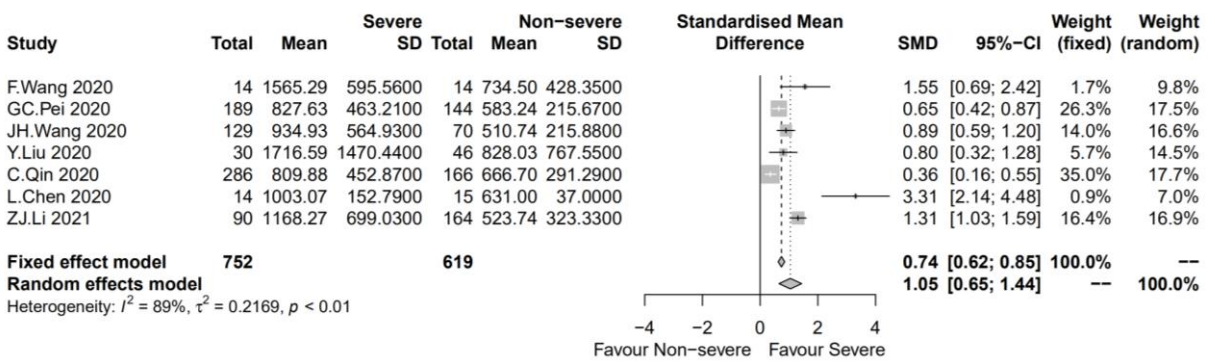

**(5) IL-4**

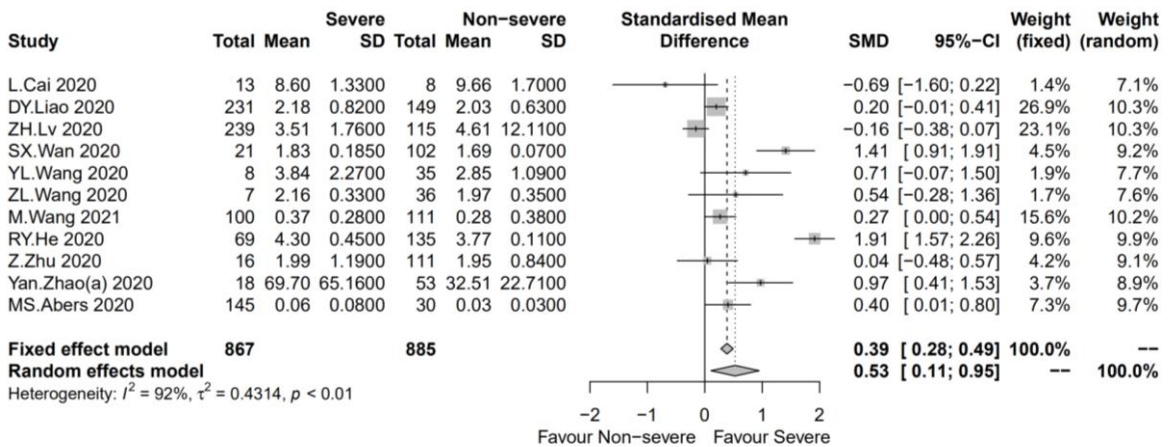

Figure E2(A) (Continued)

(6) IL-6

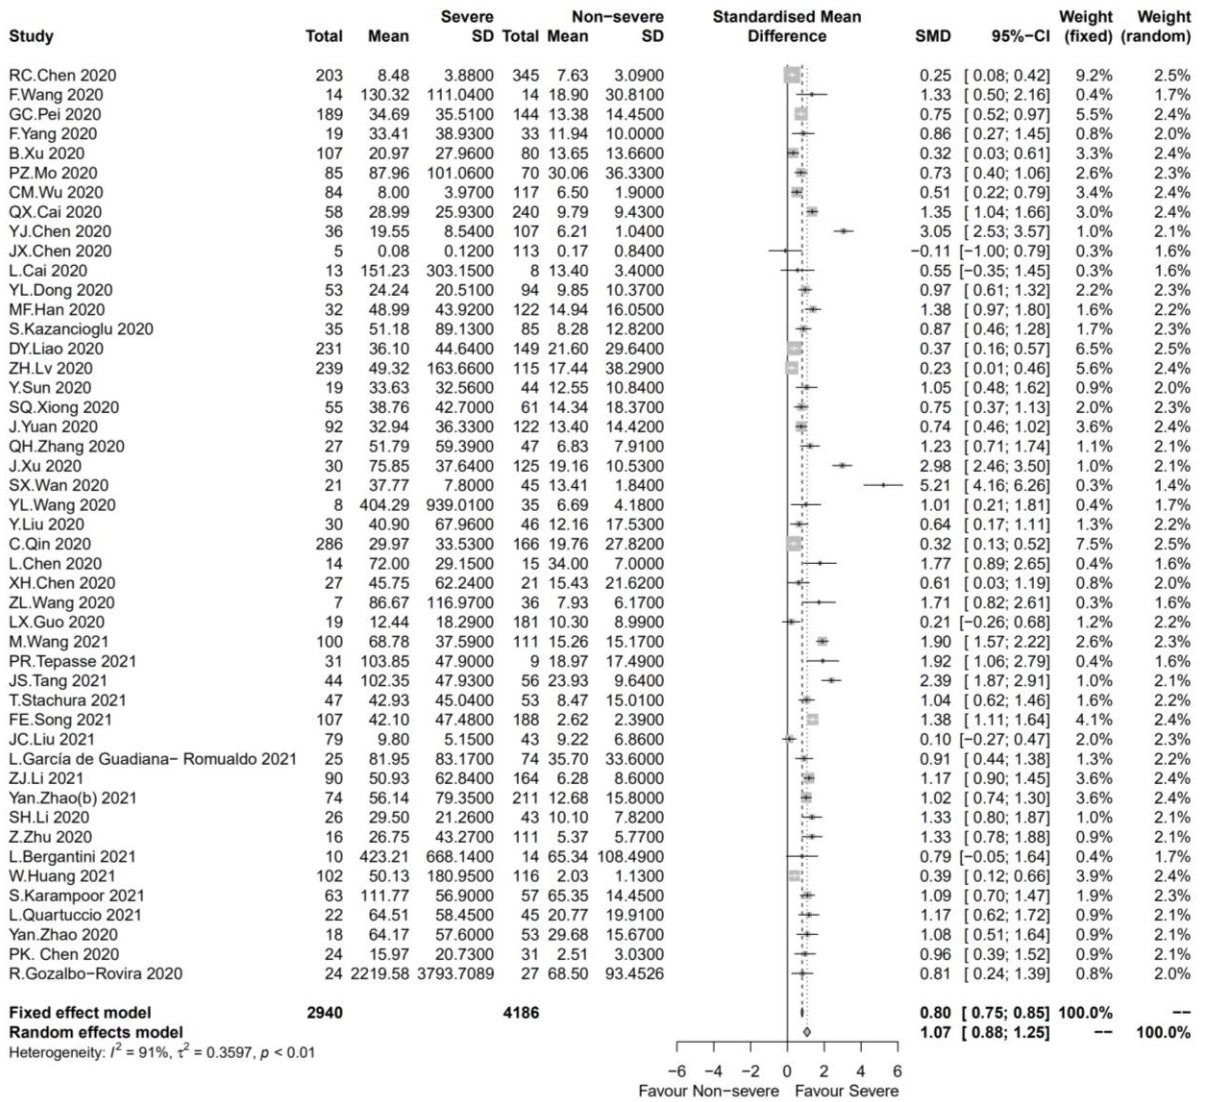

(7) IL-8

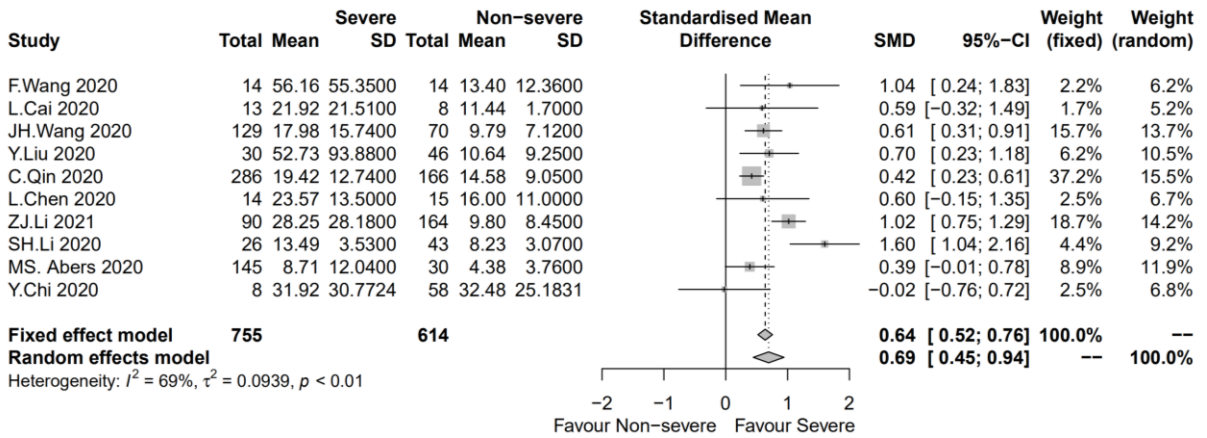

(8) IL-10

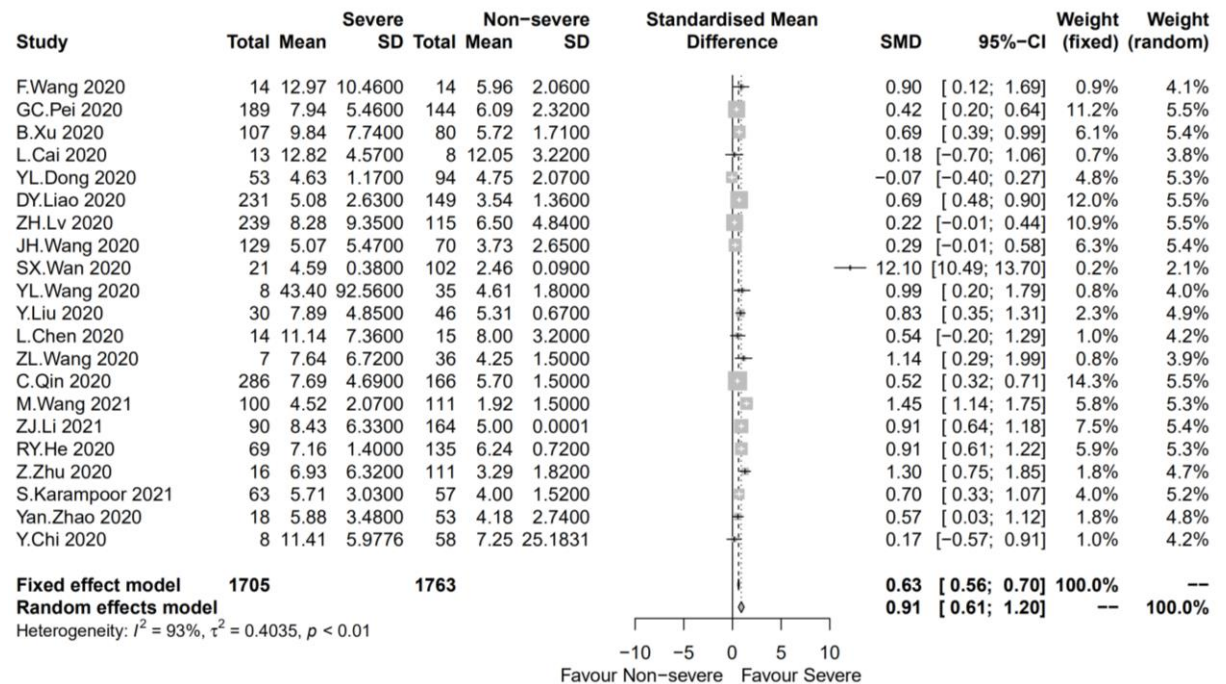

Figure E2(A) (Continued)

(9) IL-18

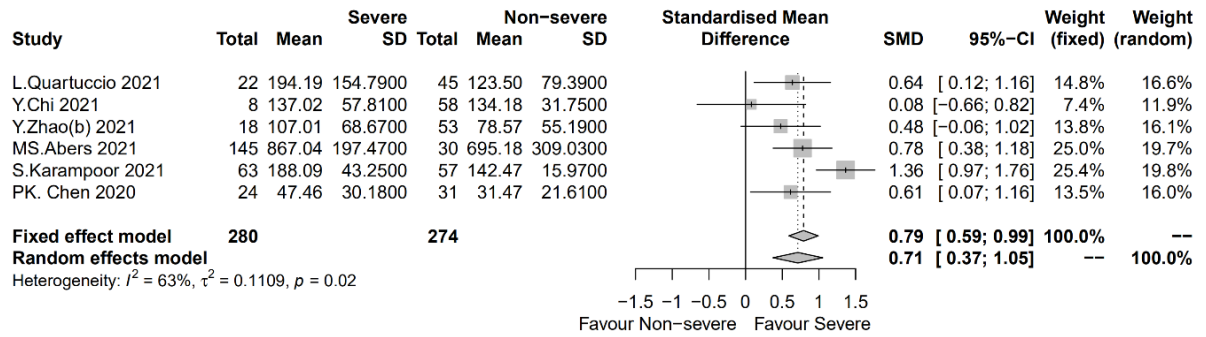

(10) TNF-α

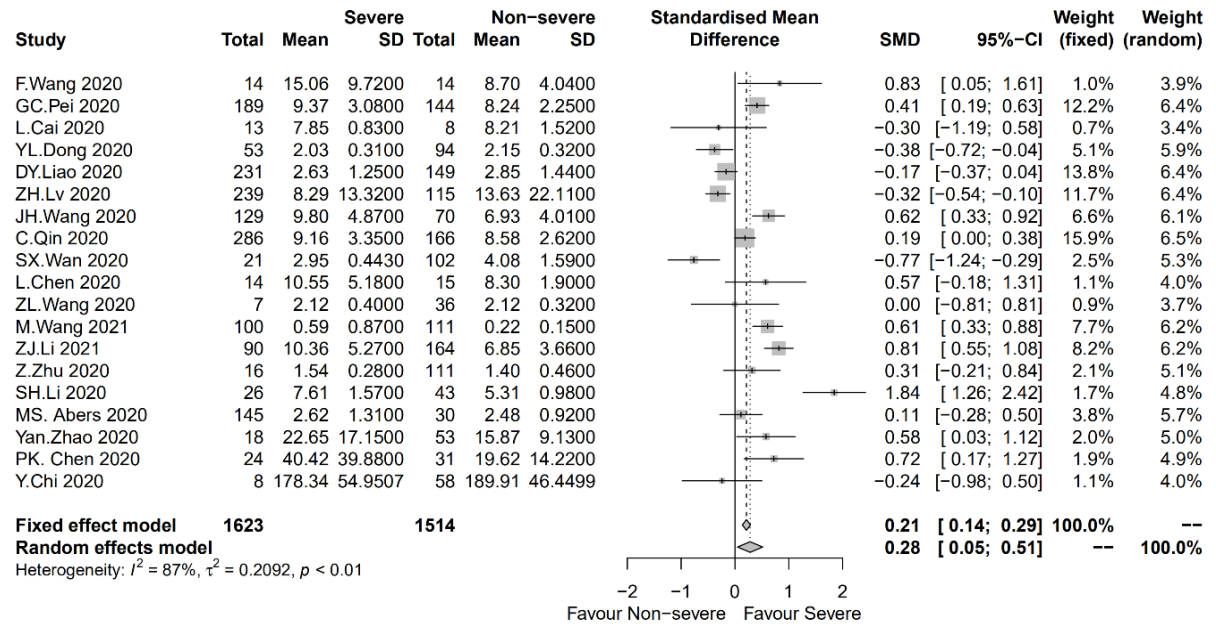

(11) IFN-γ

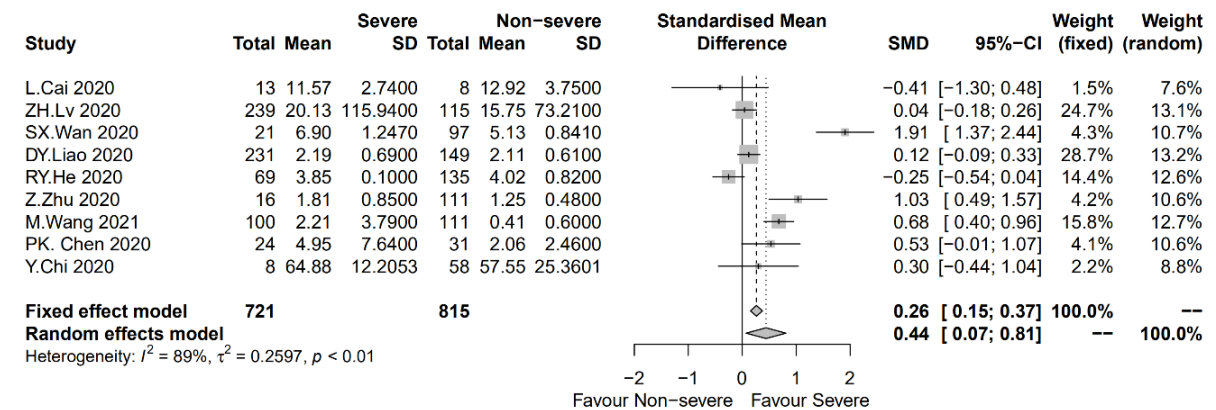

(12) CD3+T(ab)

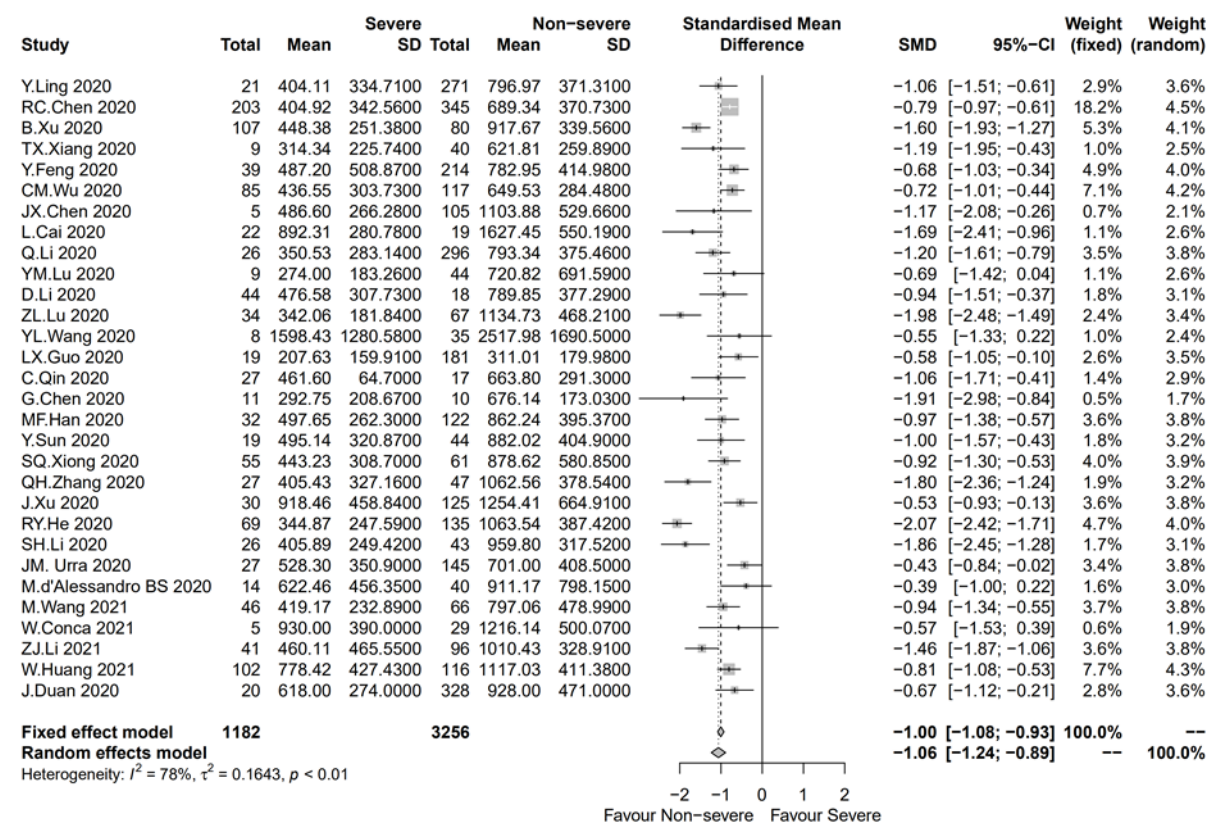

## Figure E2(A) (Continued)

### (13) CD3+T(%)

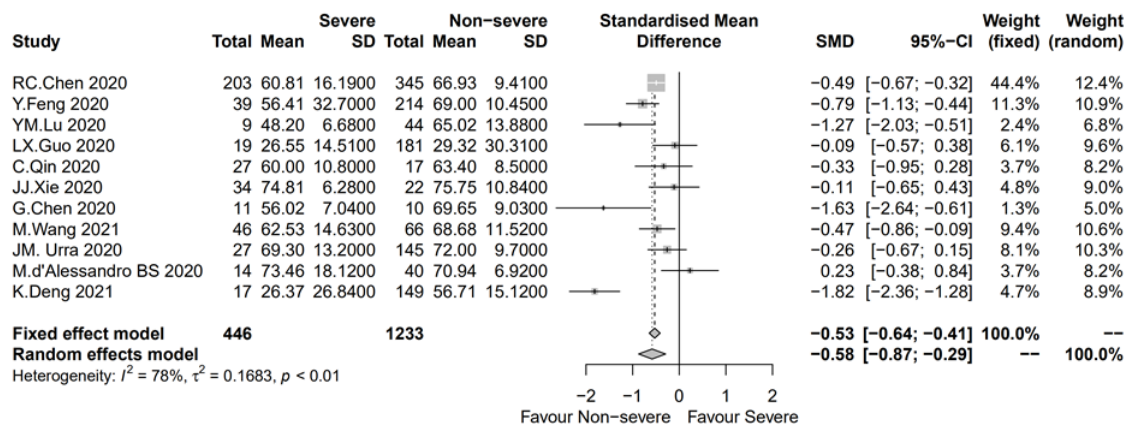

### (14) CD4+T(ab)

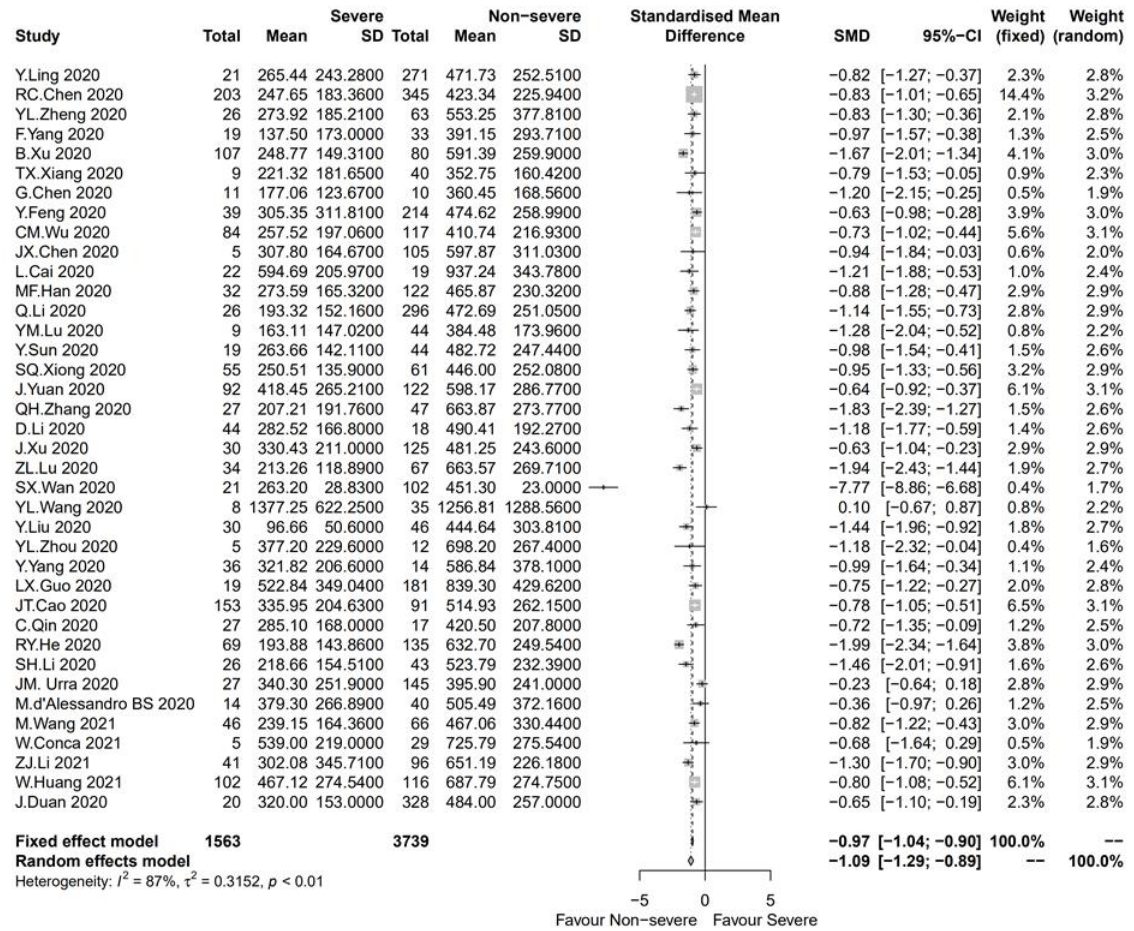

### (15) CD4+T(%)

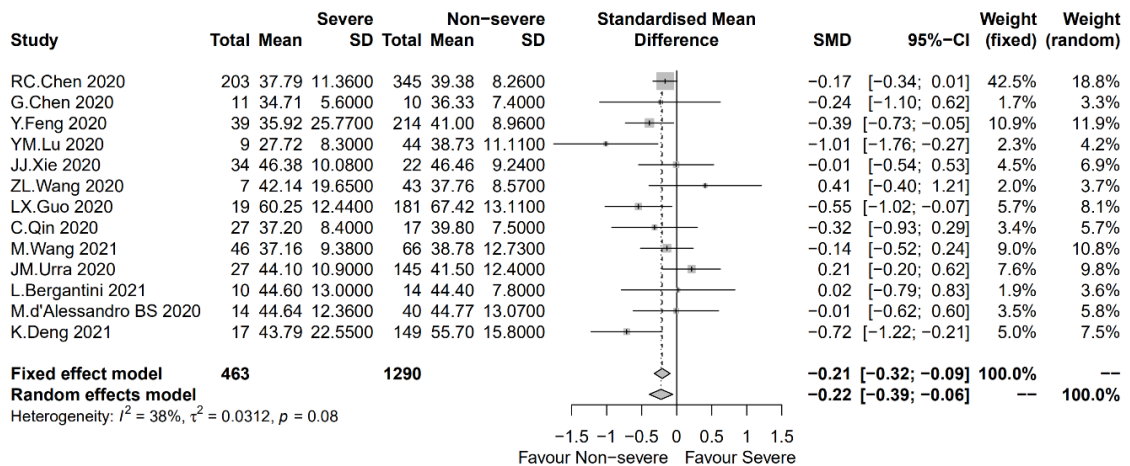

### (16) CD8+T(%)

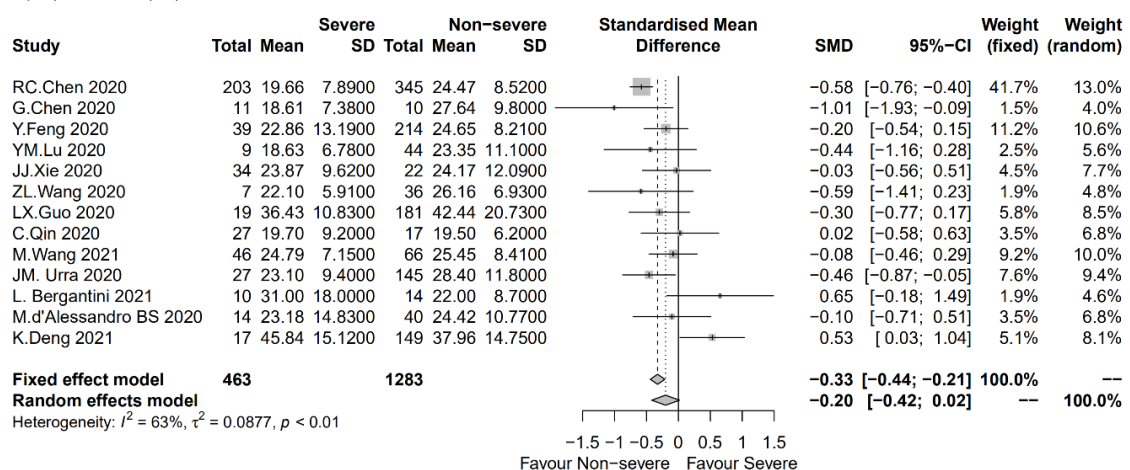

Figure E2(A) (Continued)

(17) CD8+T(ab)

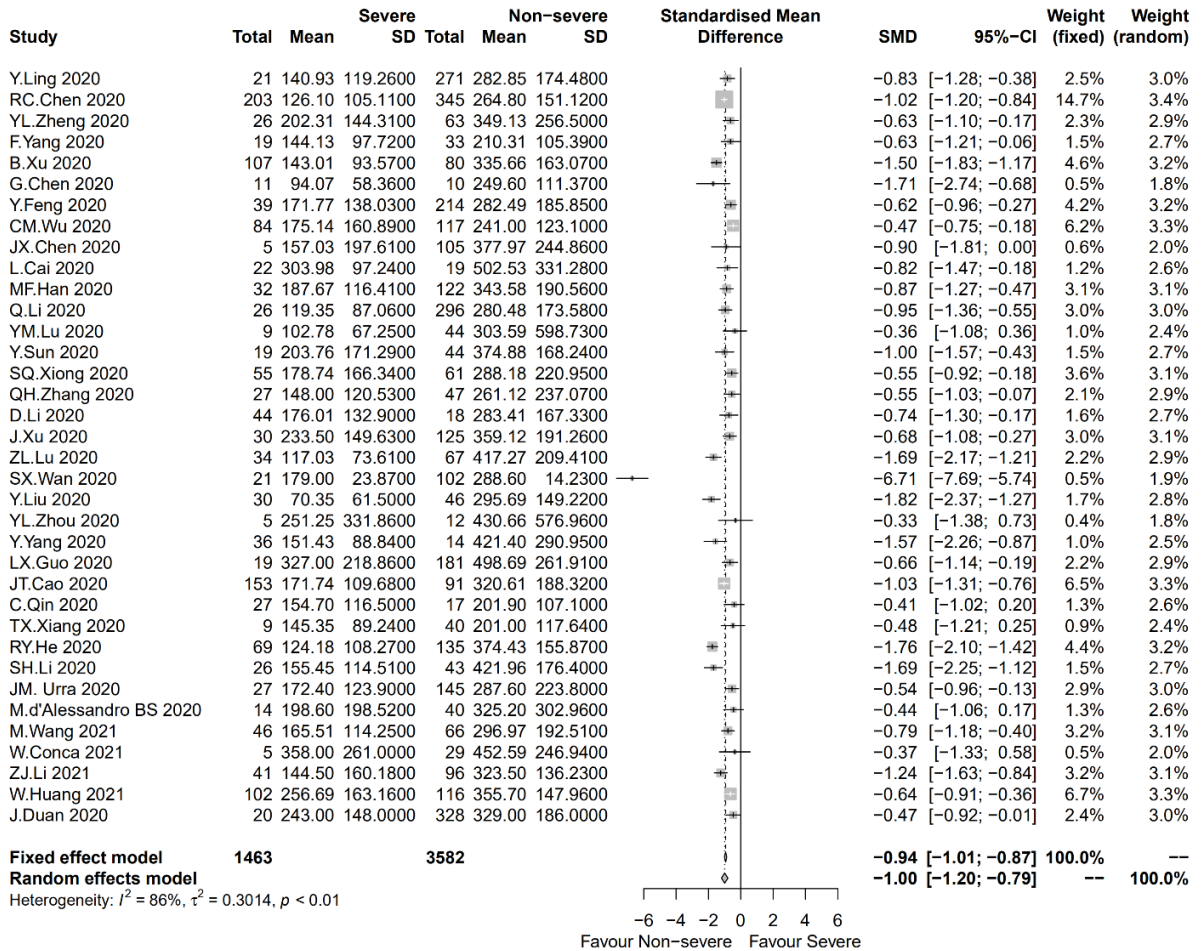

(18) CD4+T/CD8+T ratio

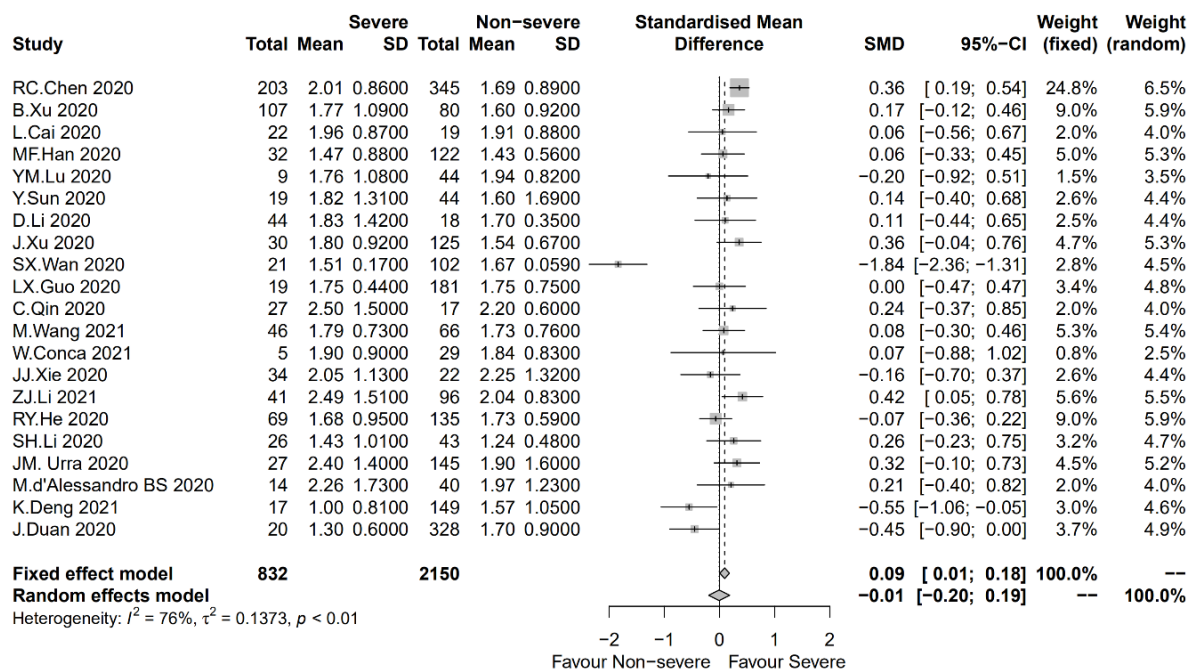

(19) B cell(ab)

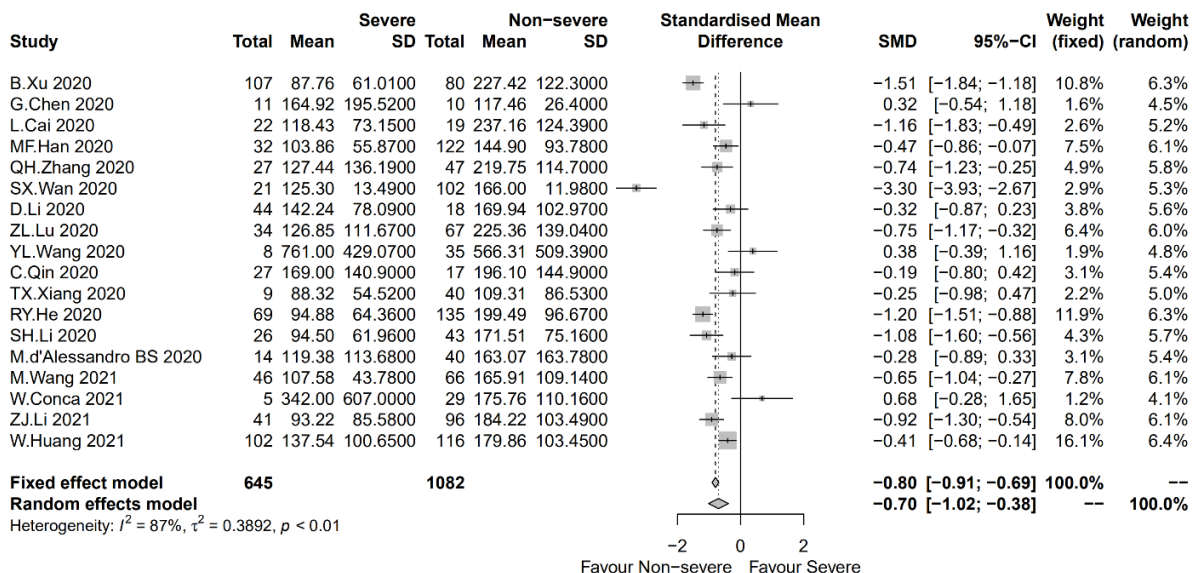

**Figure E2(A) (Continued)**

**(20) NK cell (ab)**

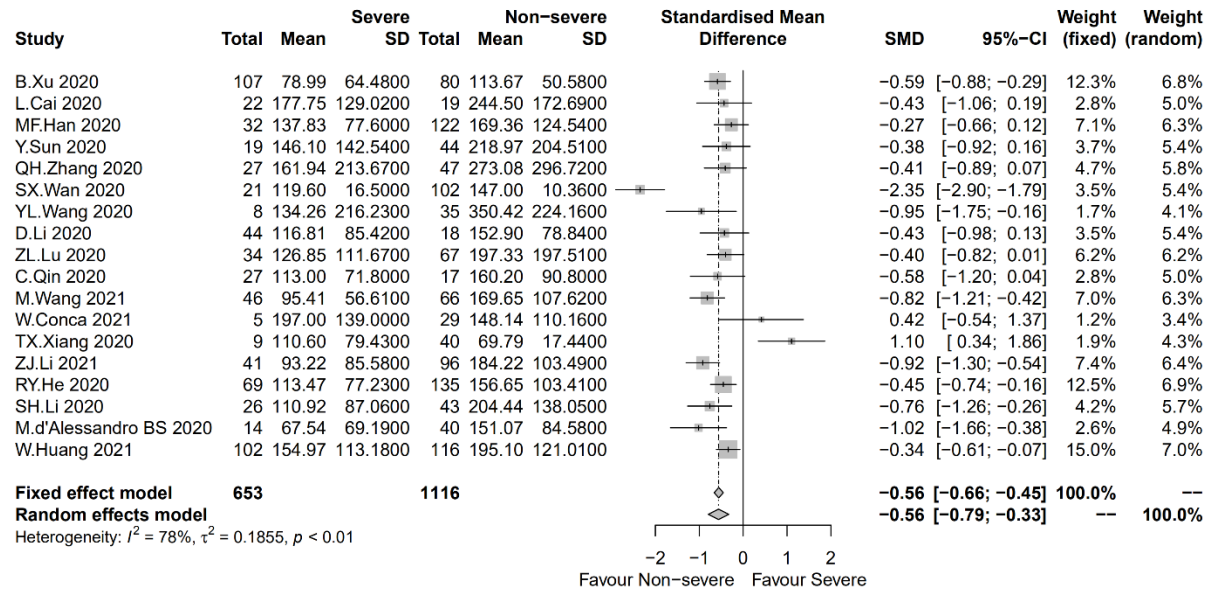

**(21) C3**

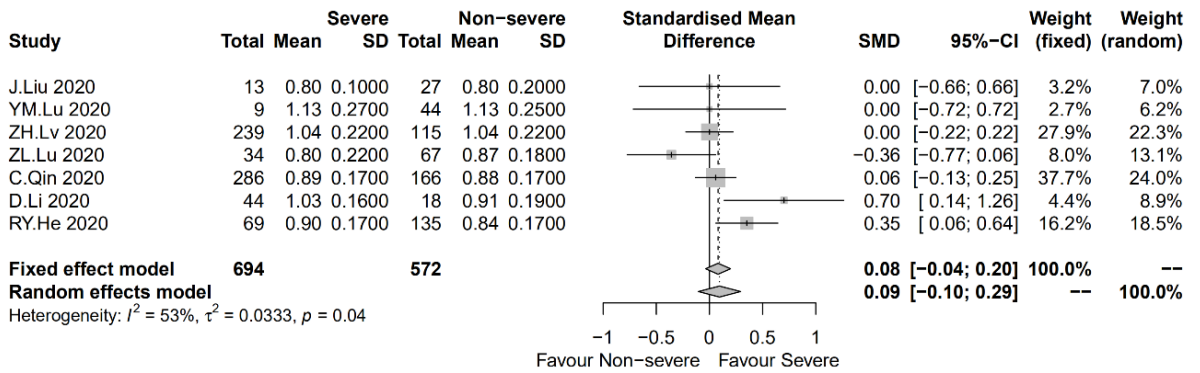

**(22) C4**

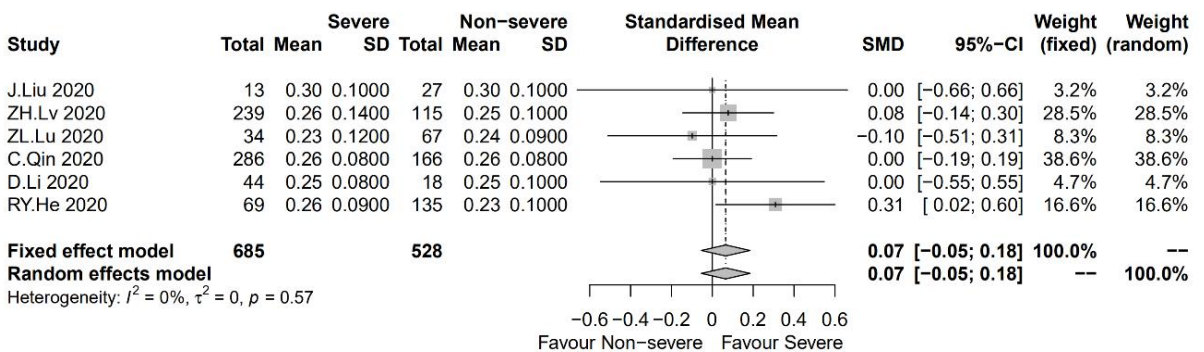

**(23) IgA**

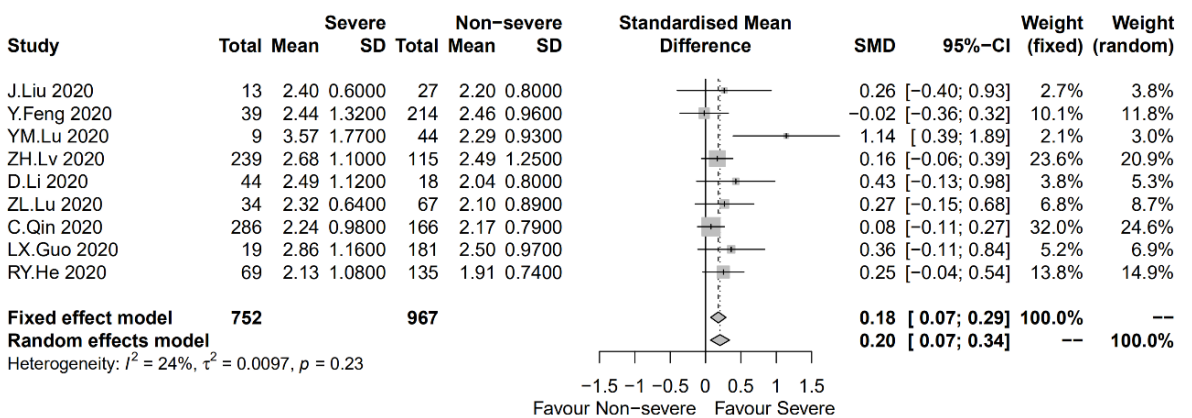

**(24) IgM**

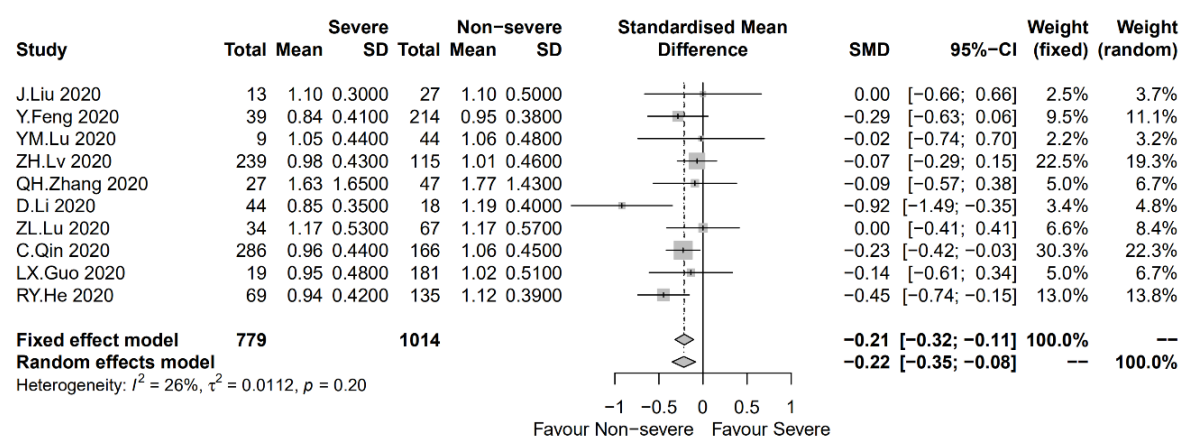

**Figure E2(A) (Continued)**

**(25) IgG**

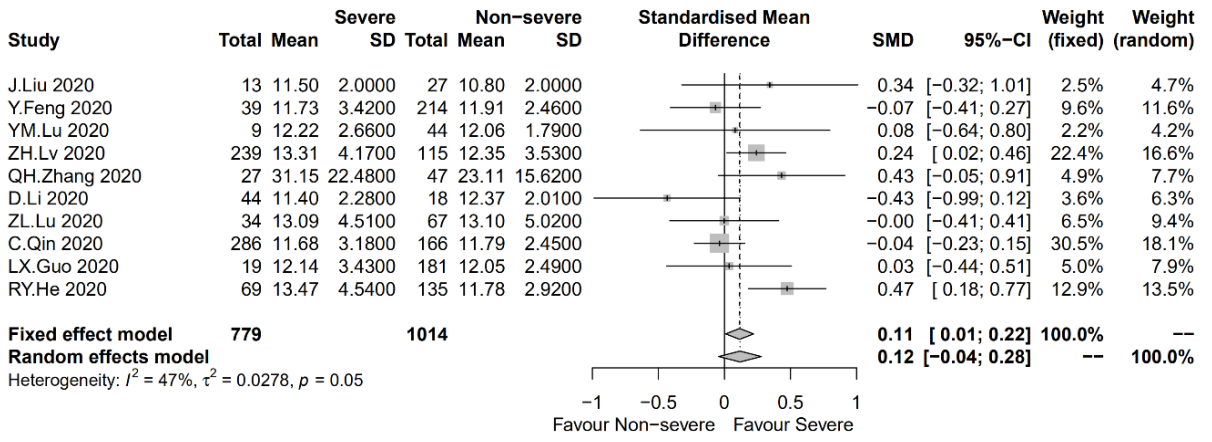

**(26) IgE**

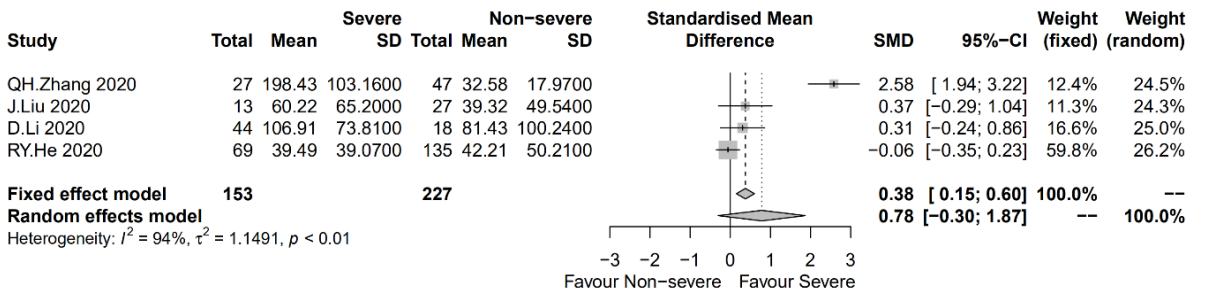

**Figure E2(B) Forest plot of immunological parameters in non-survivors and survivors of COVID-19**

**(1) IL-1 $\beta$**

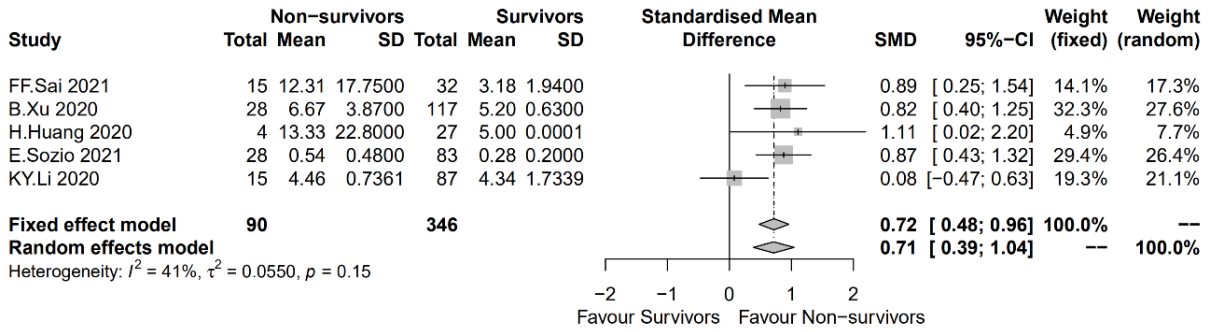

**(2) IL-2**

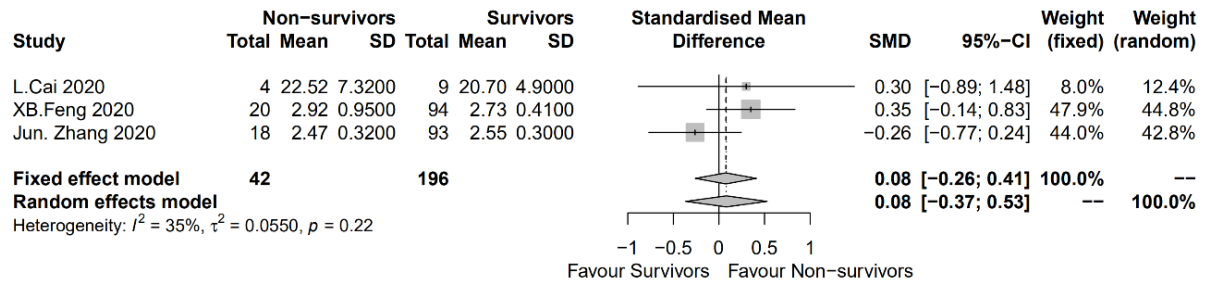

**(3) IL-2R**

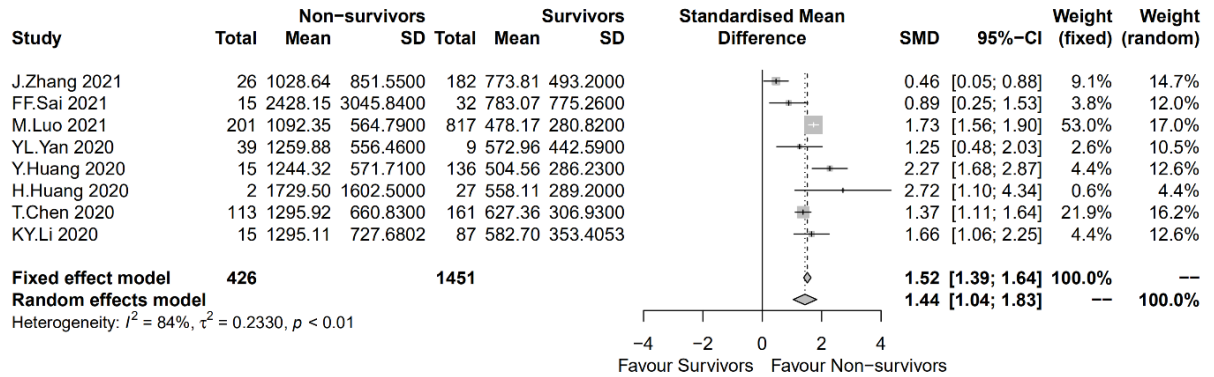

**(4) IL-4**

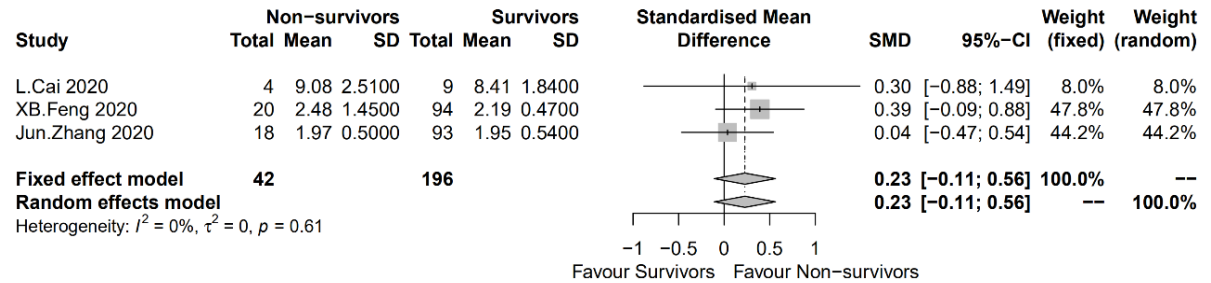

**(5) IL-6**

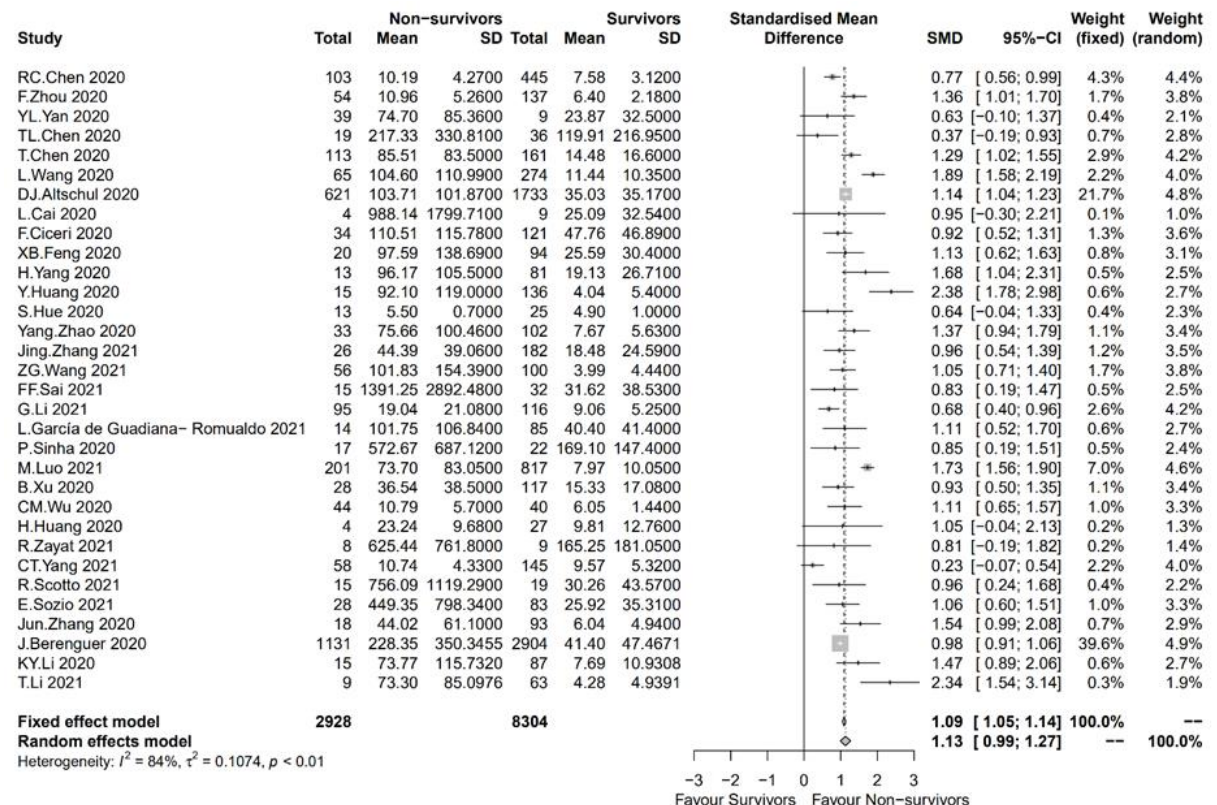



**Figure E2(B) (Continued)**

**(6) IL-8**

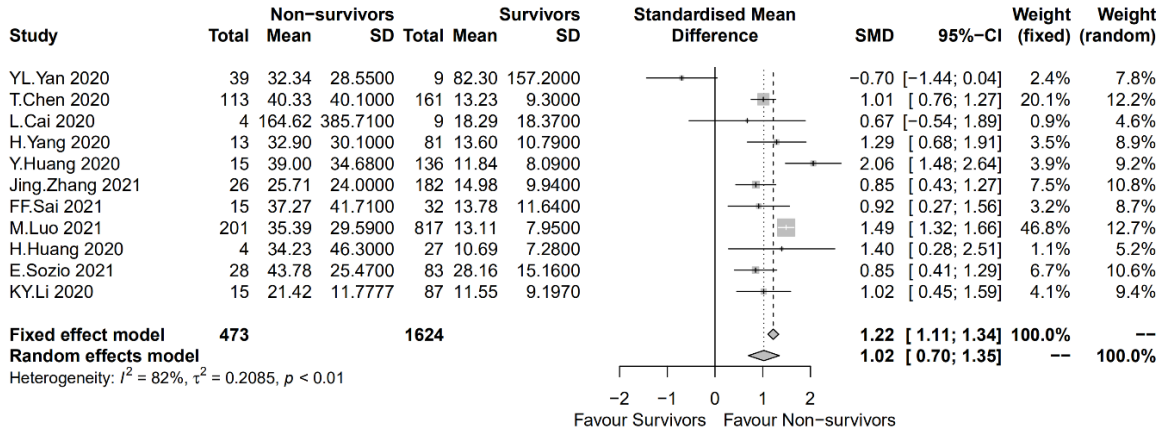

**(7) IL-10**

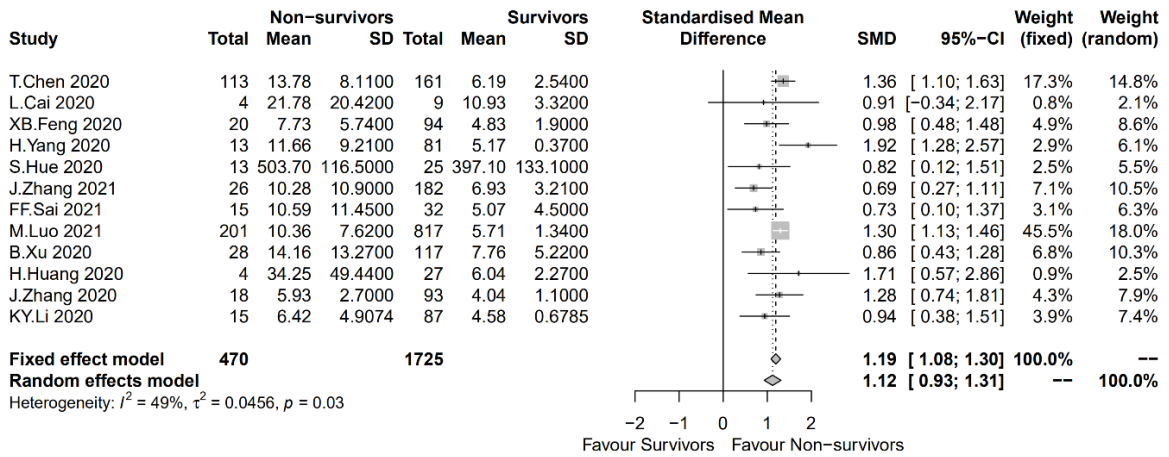

**(8) TNF-α**

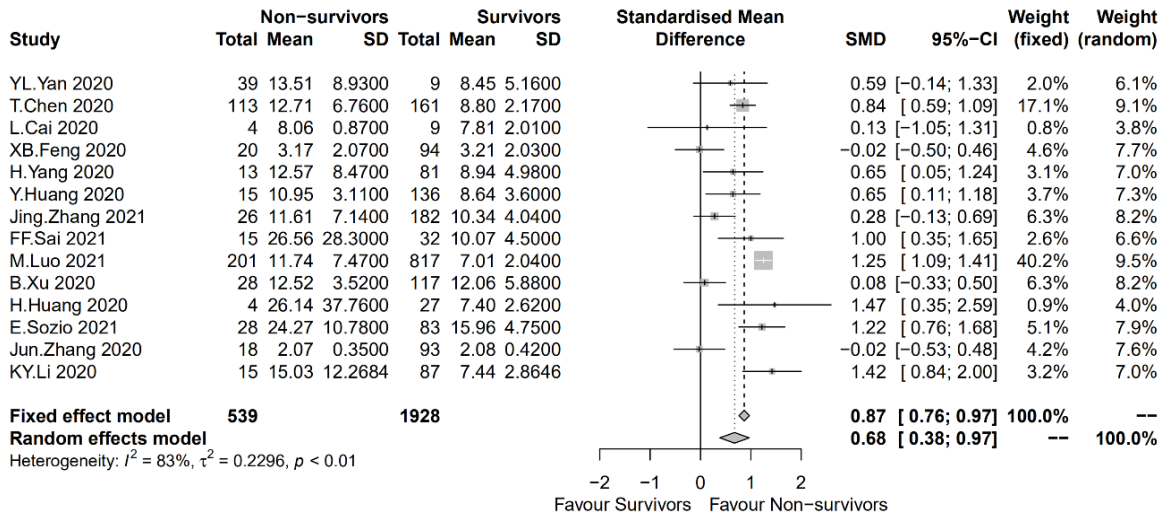

**(9) IFN-γ**

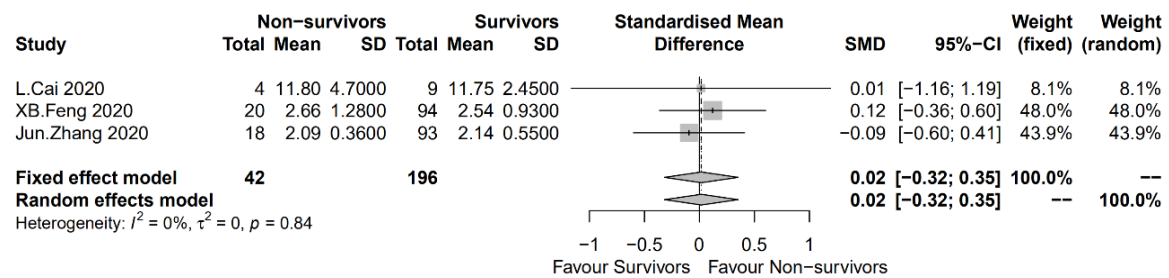

**(10) CD3+T(ab)**

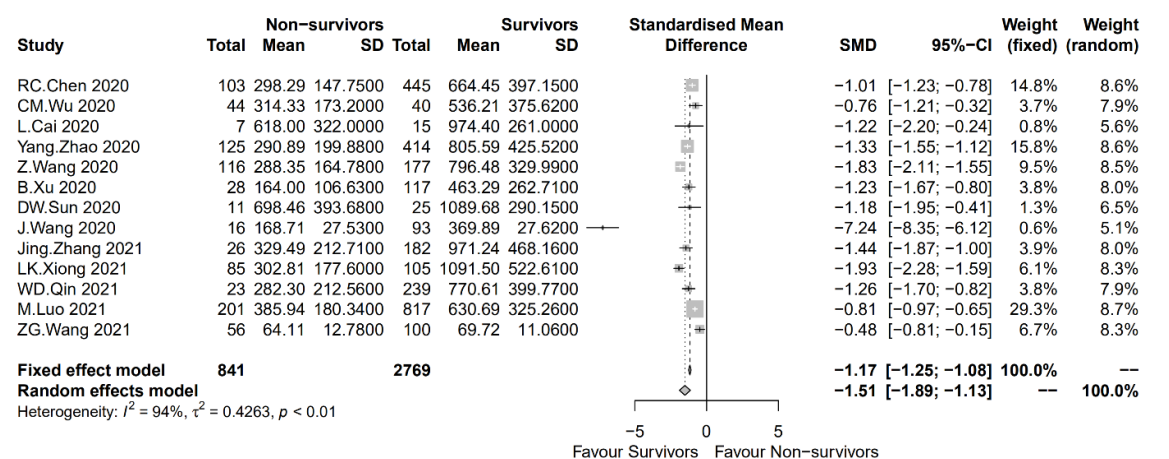

## Figure E2(B) (Continued)

### (11) CD3(%)

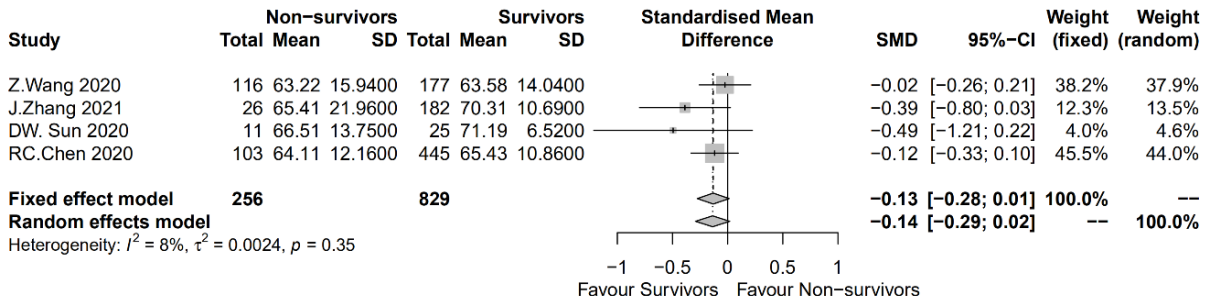

### (12) CD4+T(ab)

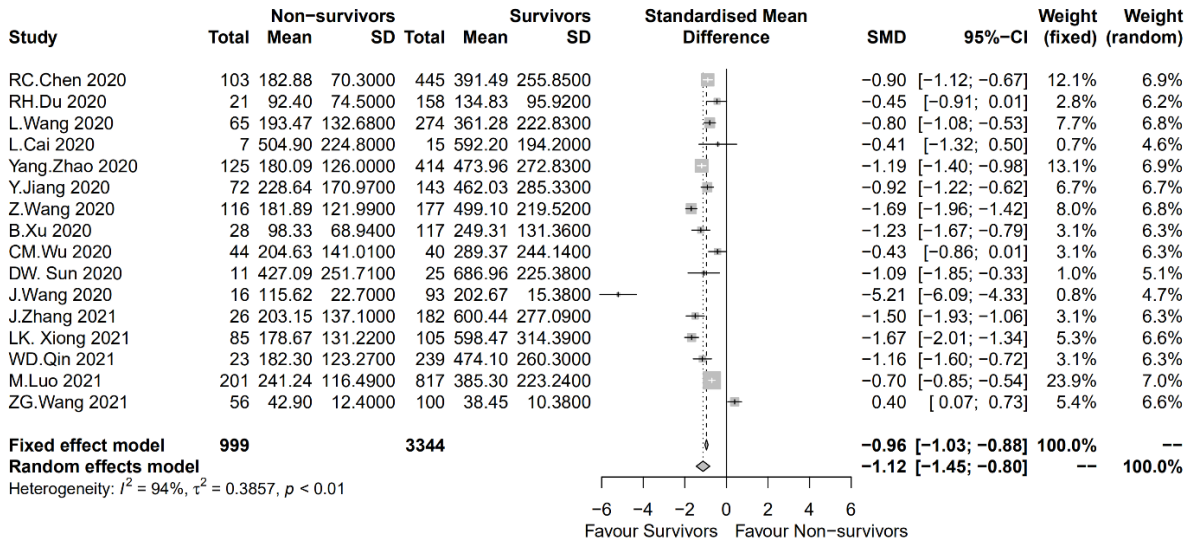

### (13) CD4+T(%)

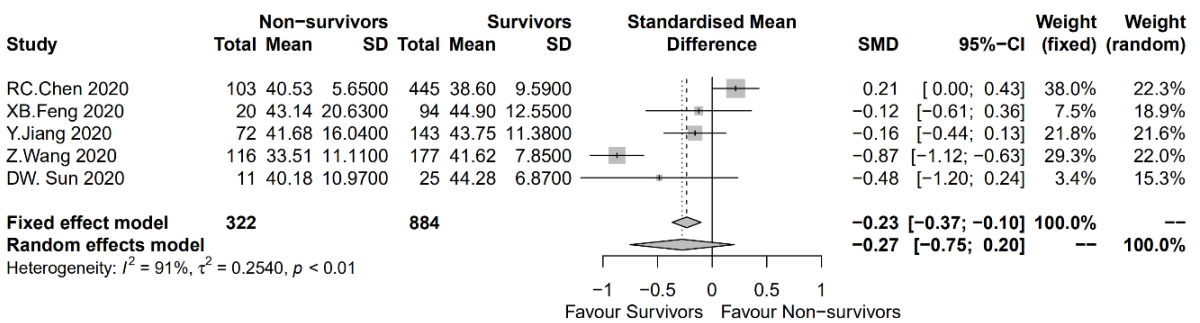

### (14) CD8+T(ab)

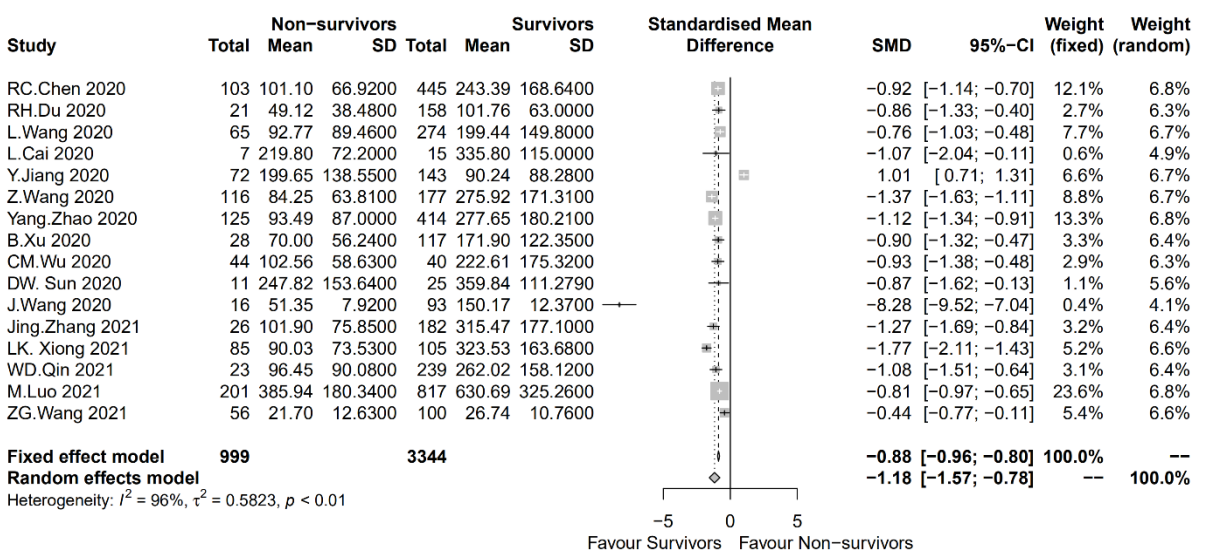

### (15) CD8+T(%)

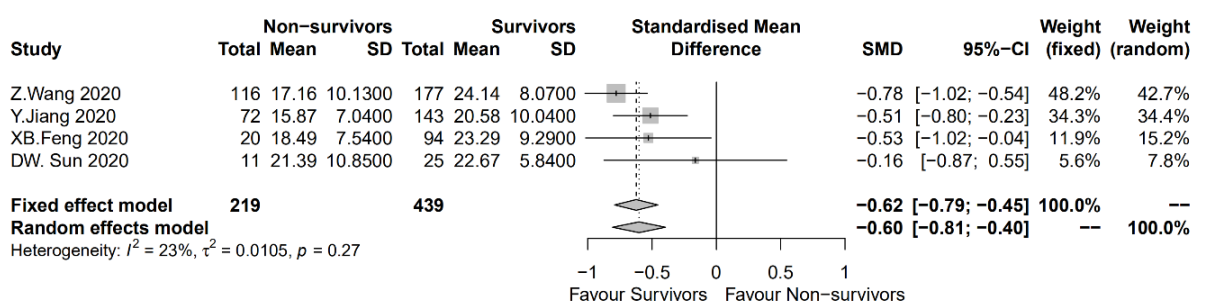

**Figure E2(B) (Continued)**

**(16) CD4+T/CD8+T ratio**

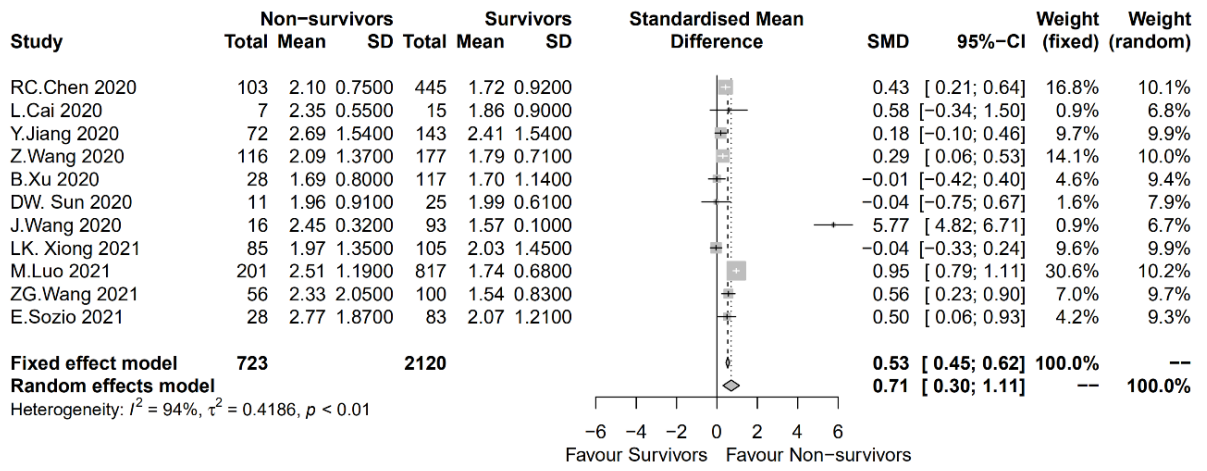

**(17) B cell(ab)**

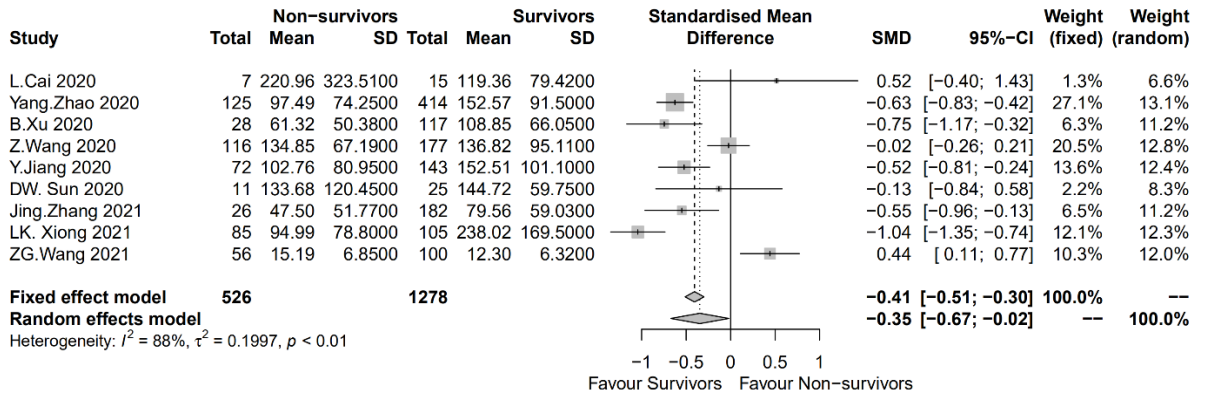

**(18) NK cell(ab)**

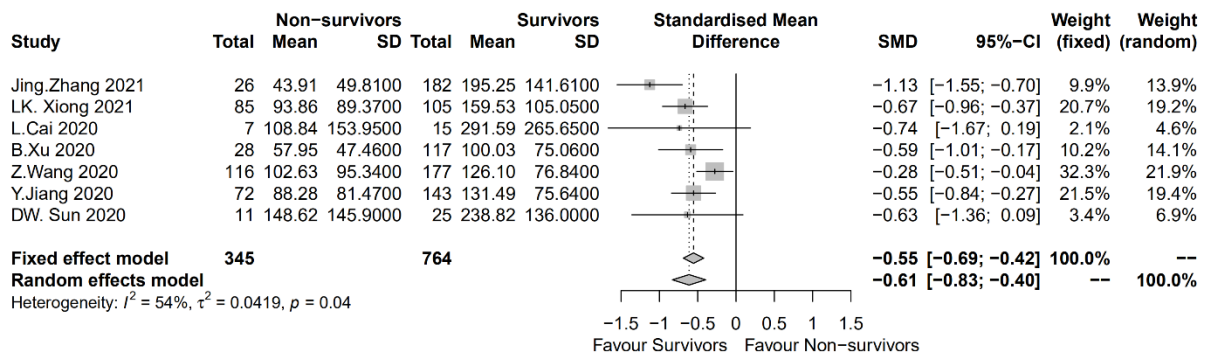

**(19) C3**

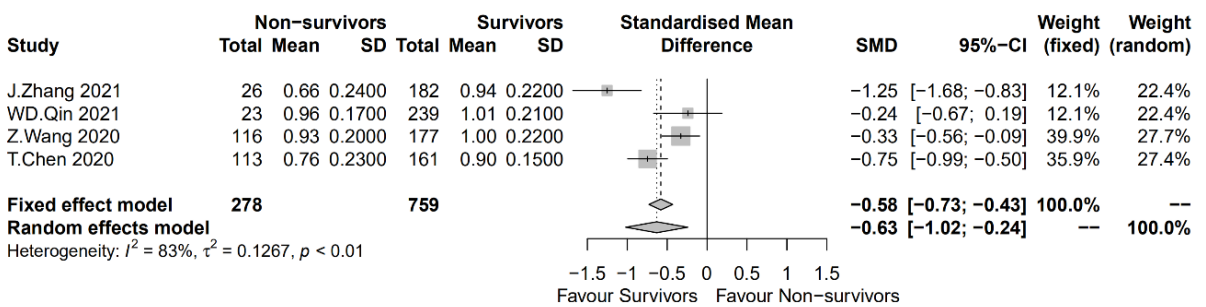

**(20) C4**

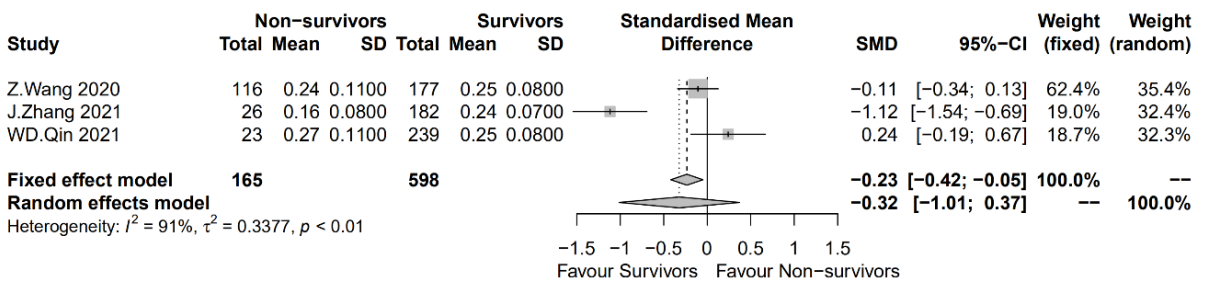

**(21) IgA**

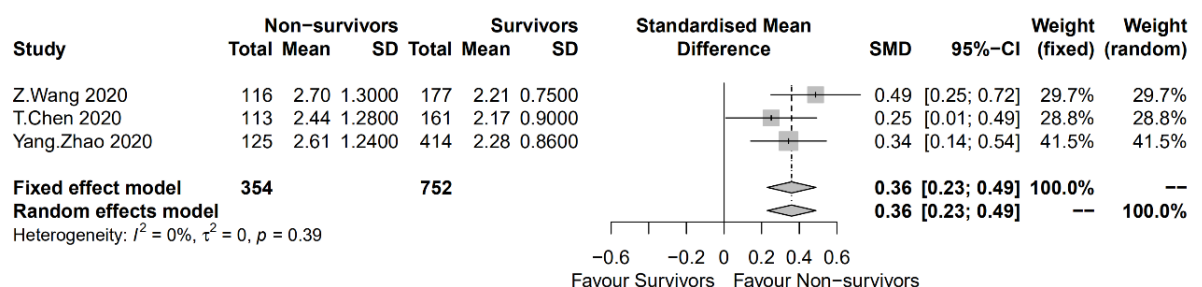

**Figure E2(B) (Continued)**

**(22) IgM**

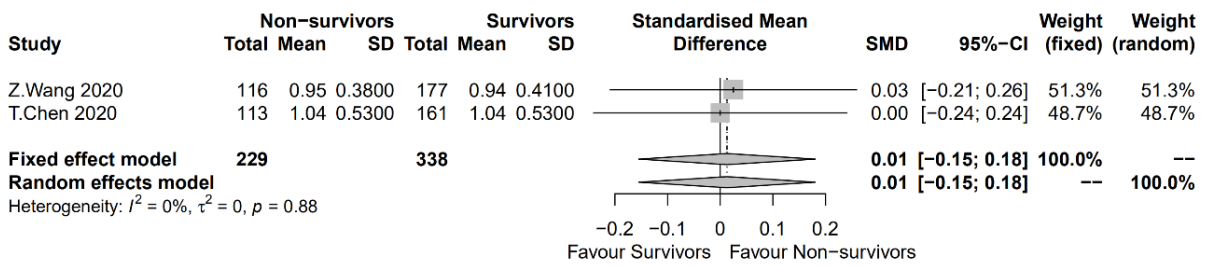

**(22) IgG**

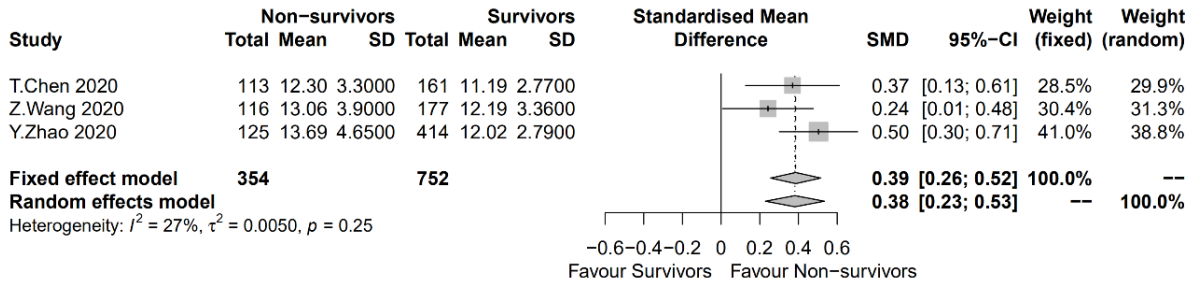

Supplement: 12016_2021_8908_MOESM2_ESM.pdf [file 12016_2021_8908_MOESM2_ESM.pdf]
