# Supplementary material
Source: PubMed Central journal article supplement (PMC8763427)

**Figure E3 (A) Forest plots of hematological parameters in severe and non-severe patients of COVID-19**

**(1) WBC**

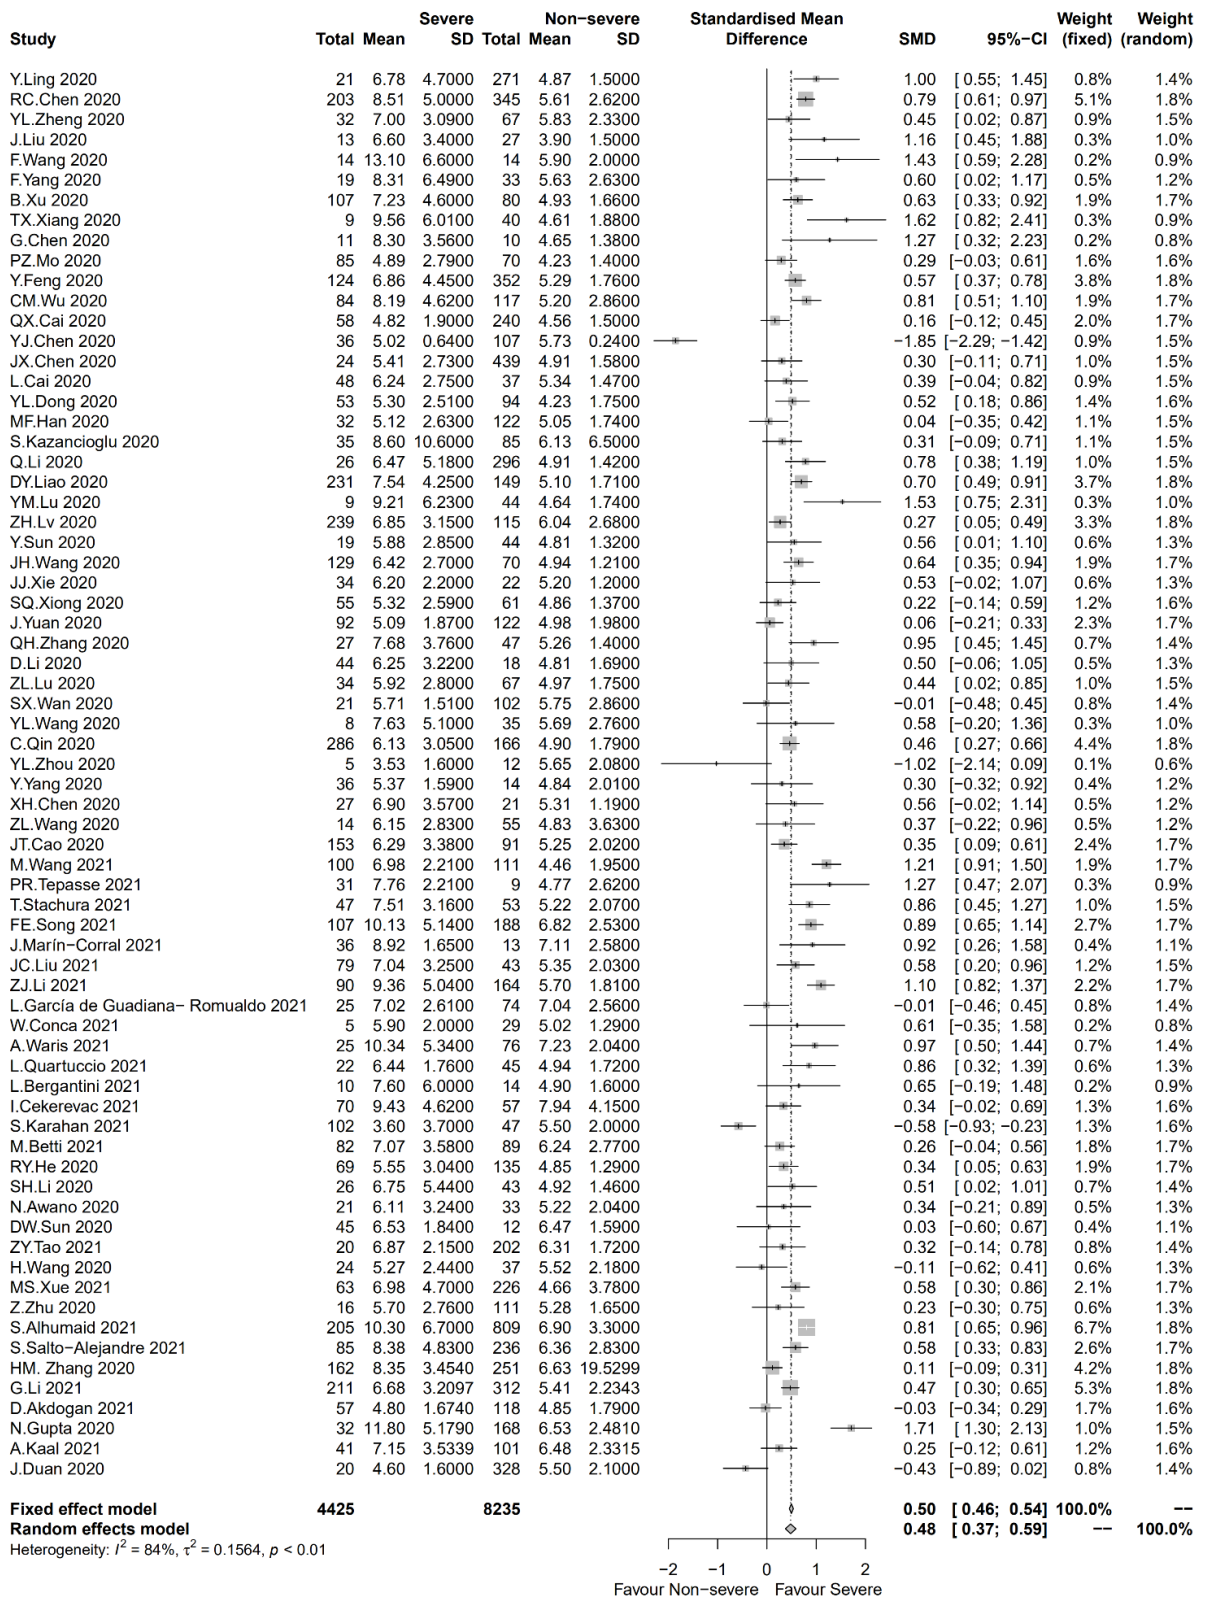

**(2) EOS**

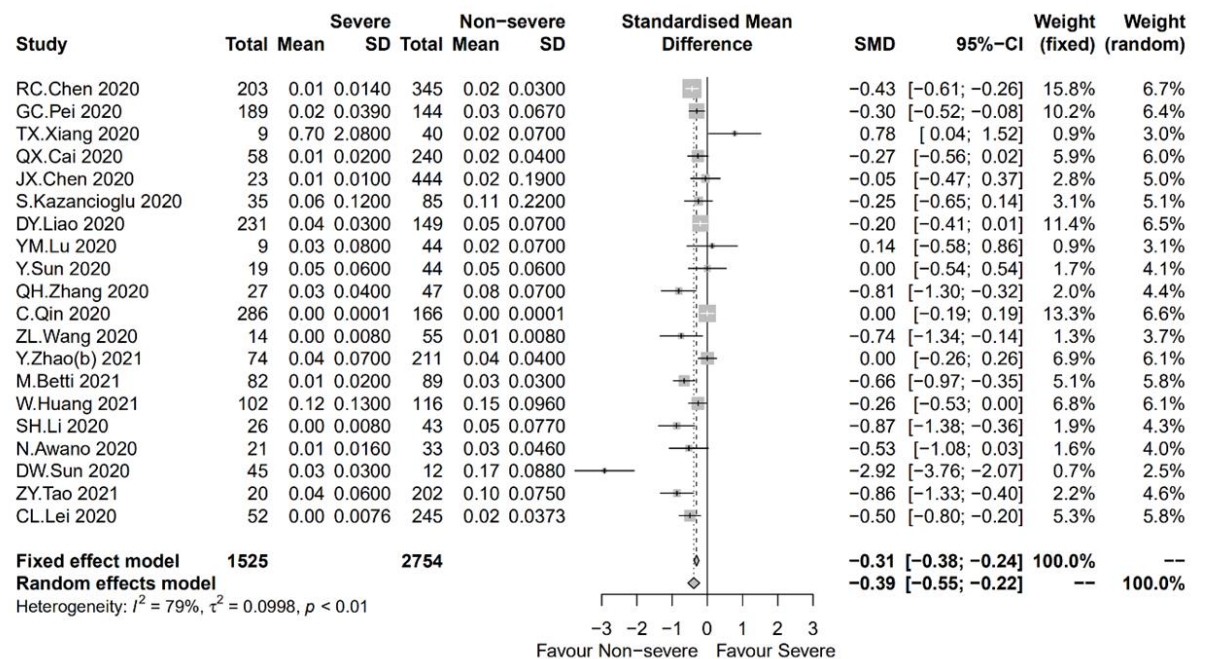

Figure E3 (A) (Continued)

(3) Neu

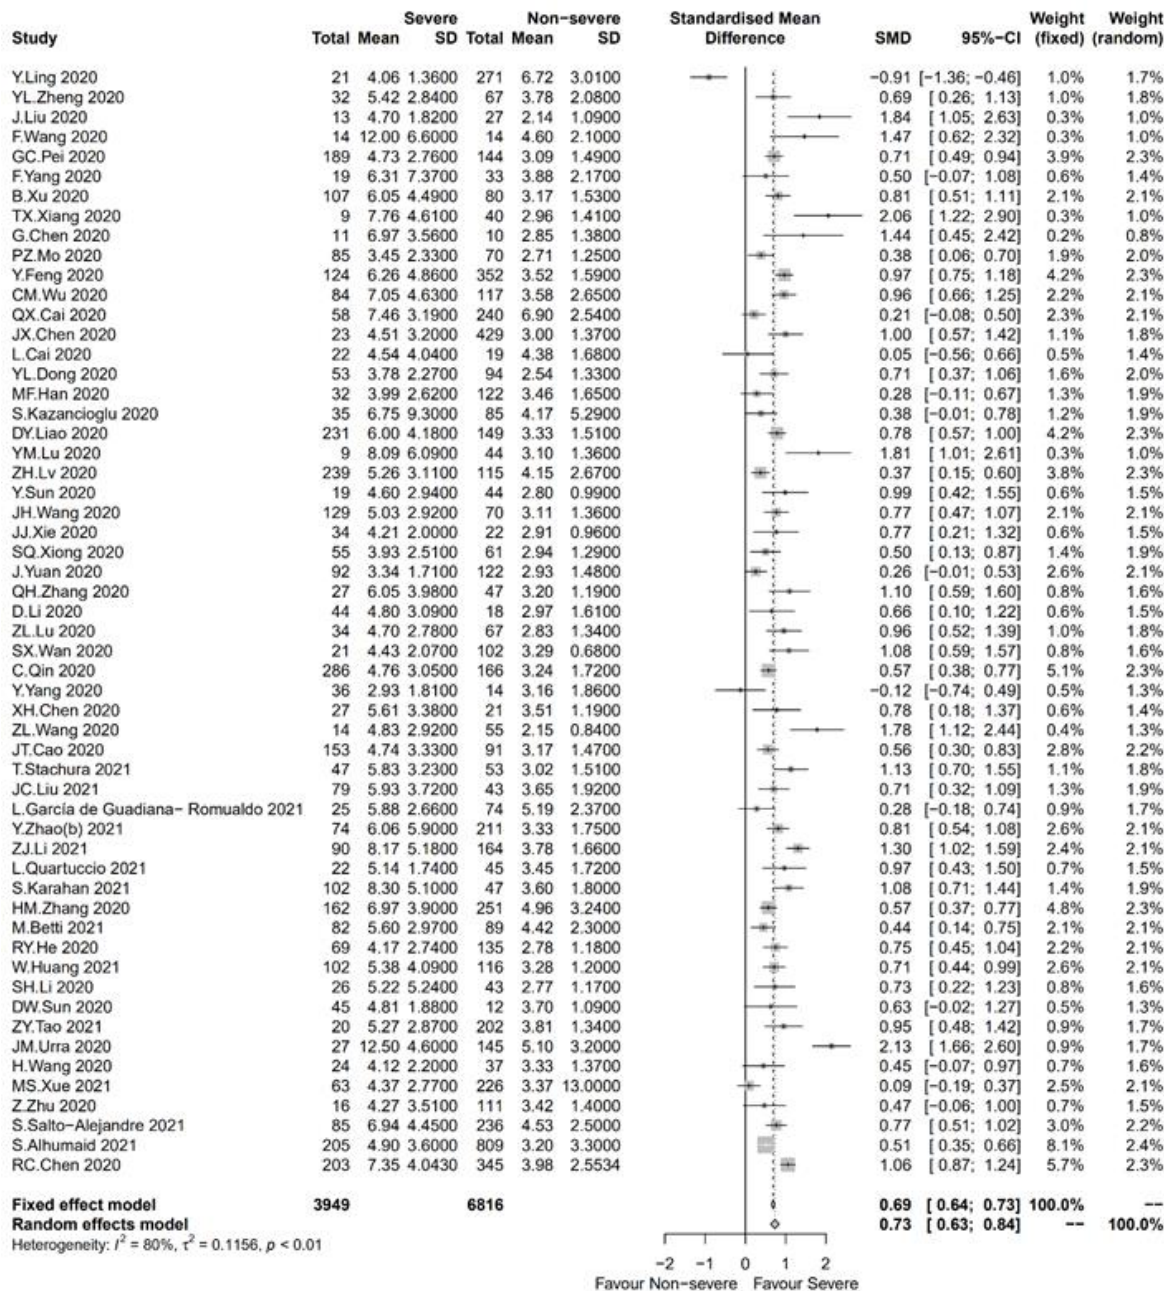

(4) Bas

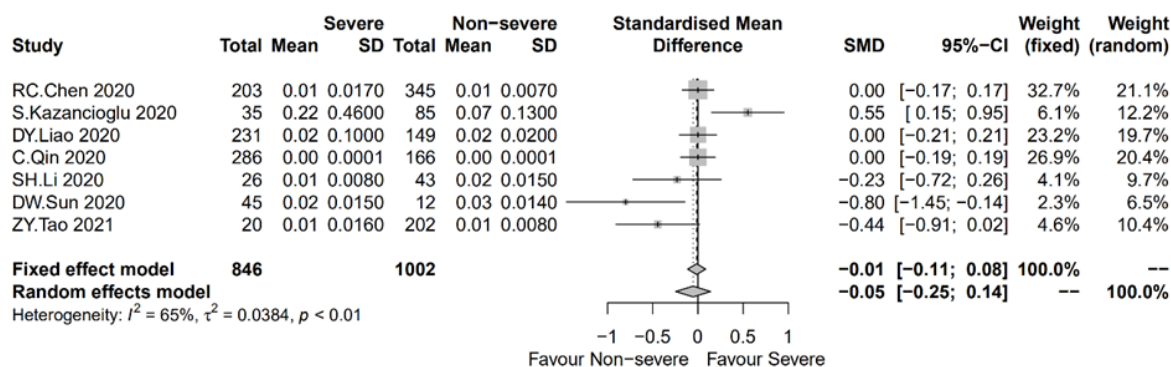

(5) Mono

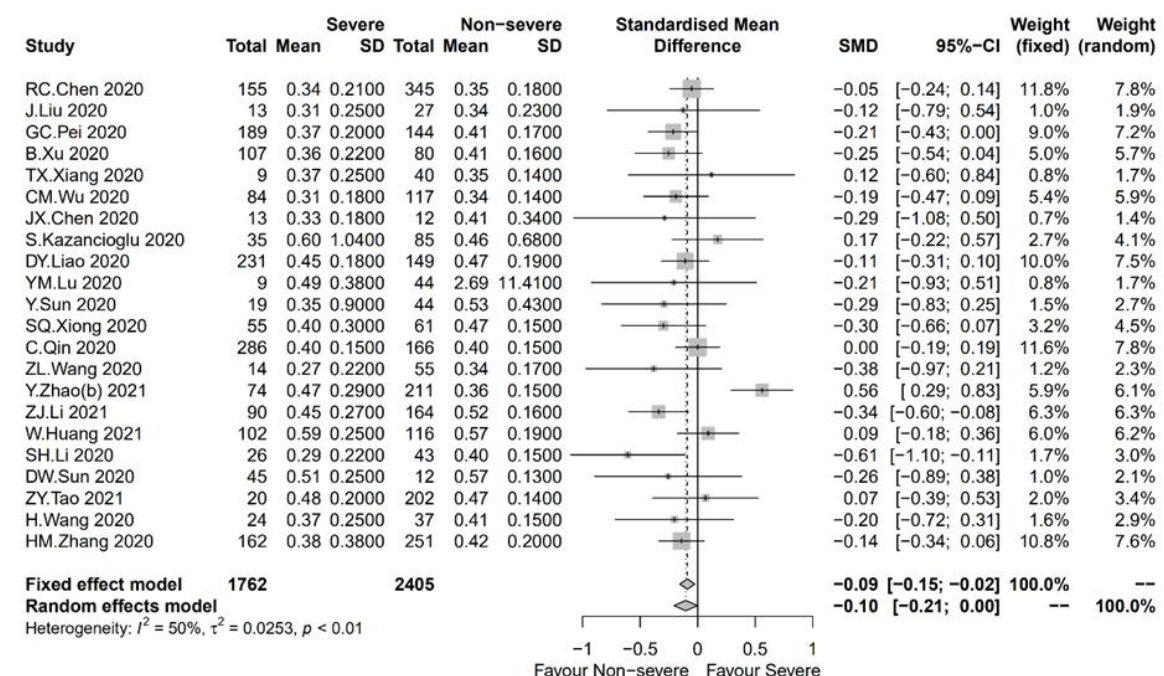

Figure E3 (A) (Continued)

(6) Lym

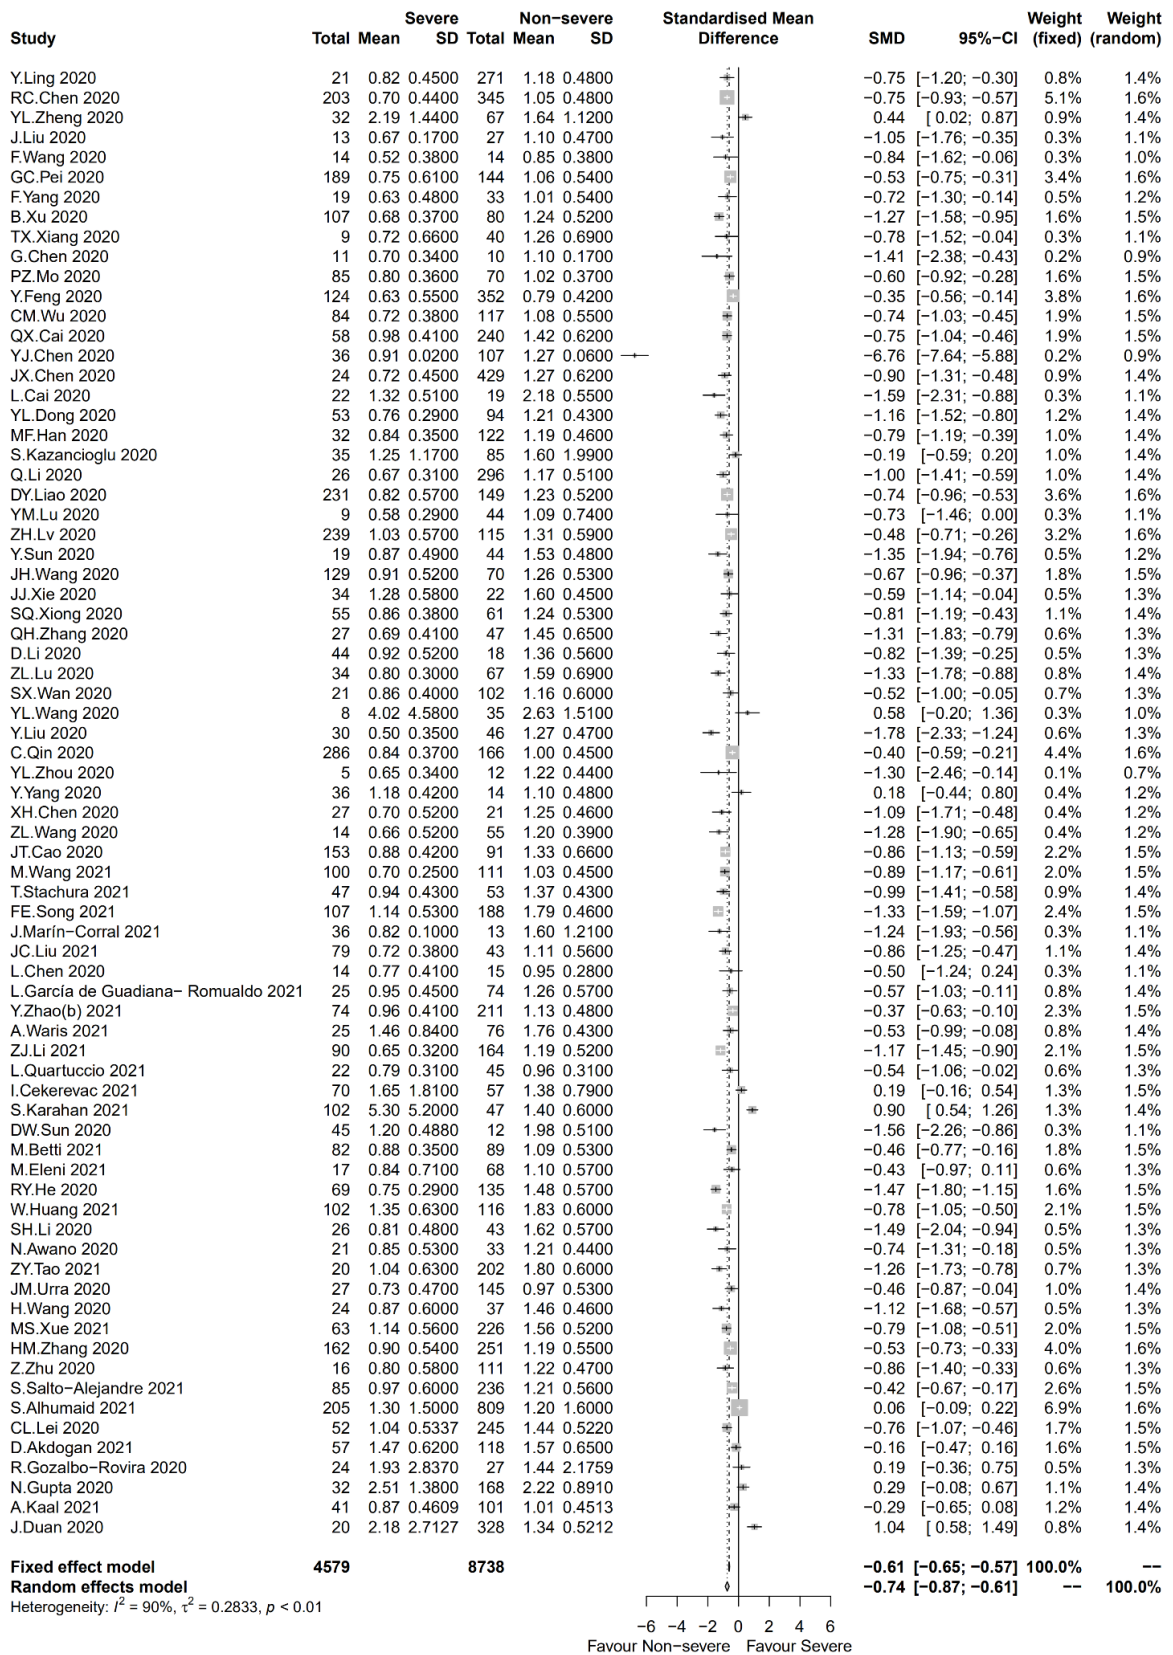

(7) PLR

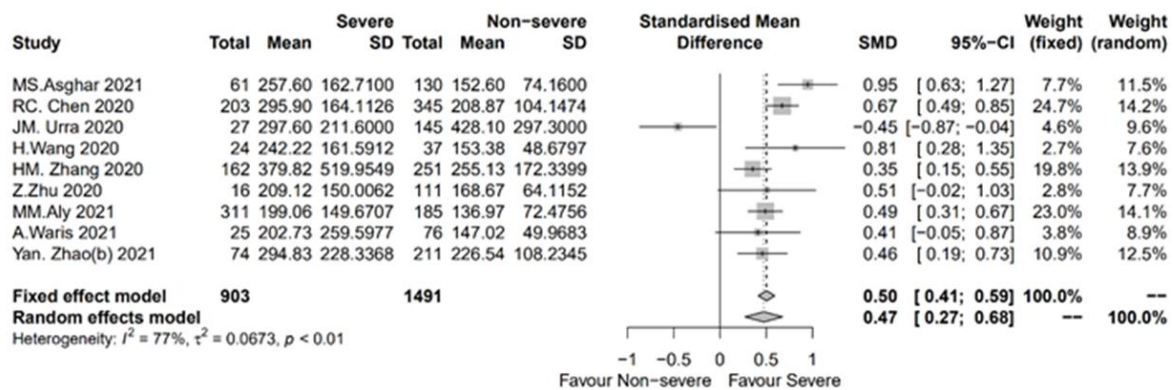

(8) LMR

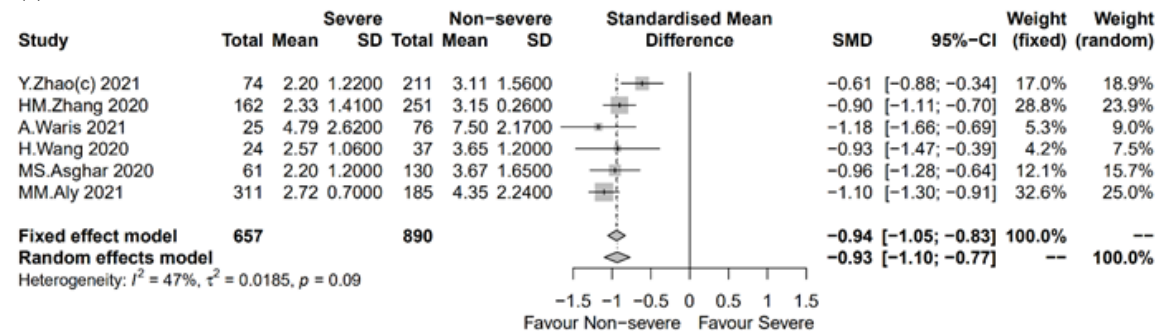

Figure E3 (A) (Continued)

(9) NLR

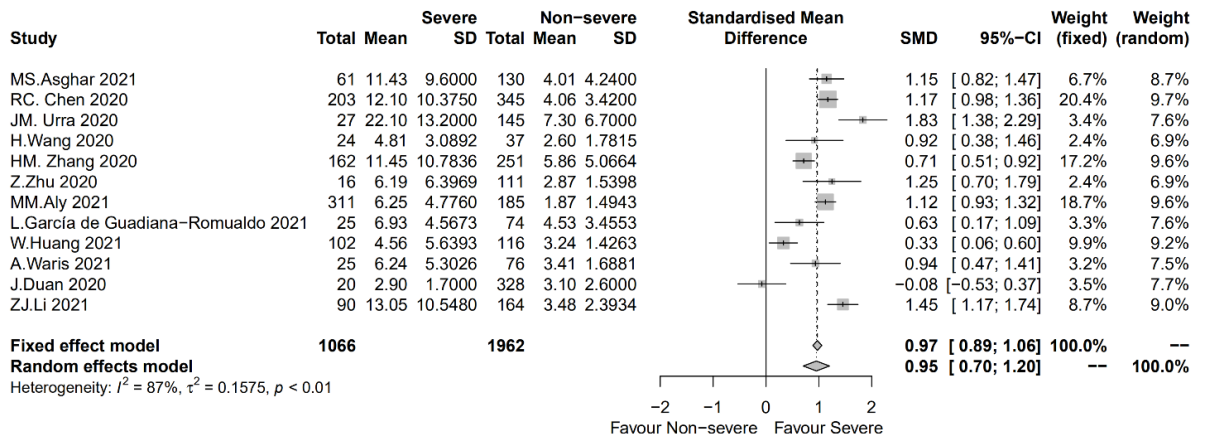

(10) HB

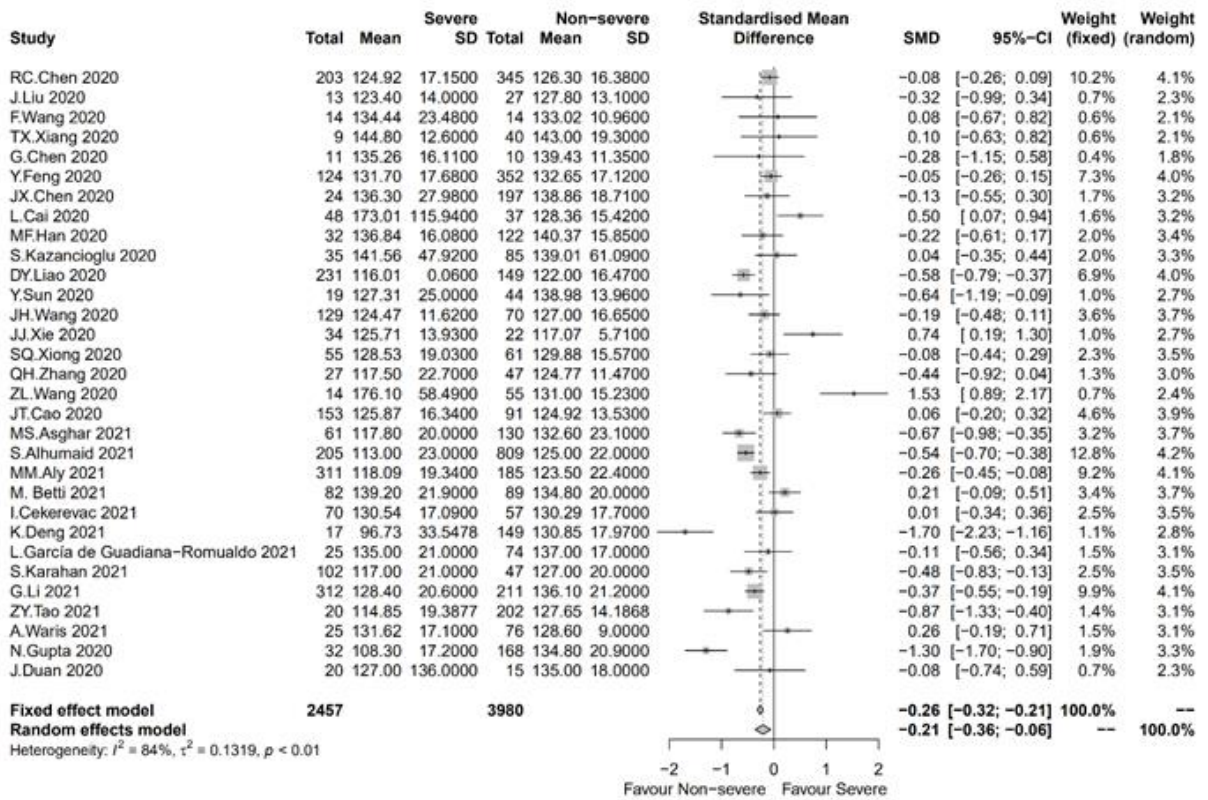

(11) PLT

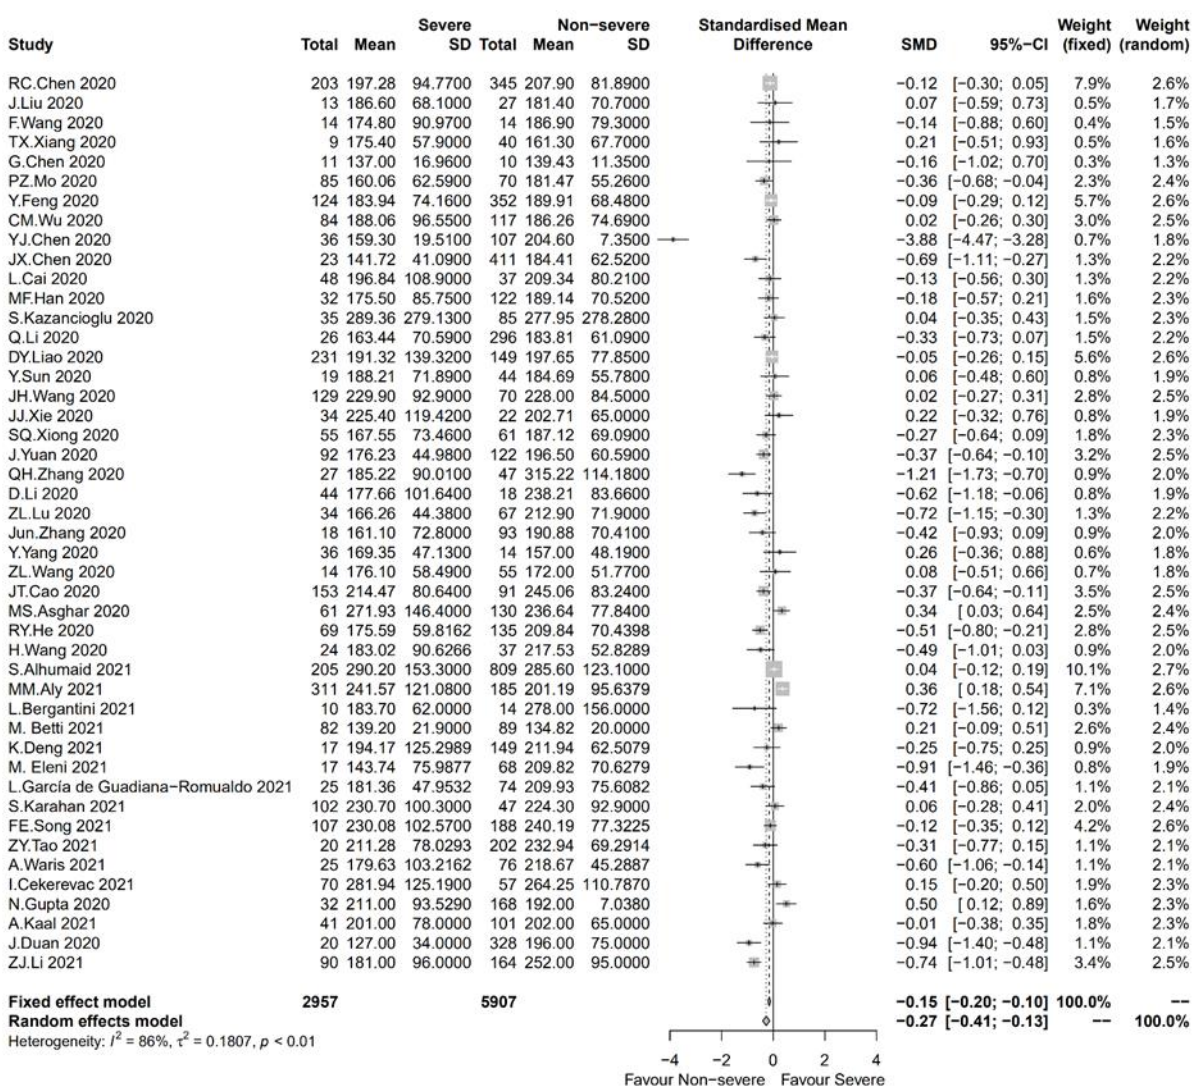

**Figure E3(B) Forest results of hematological parameters in non-survivors and survivors of COVID-19**

**(1) WBC**

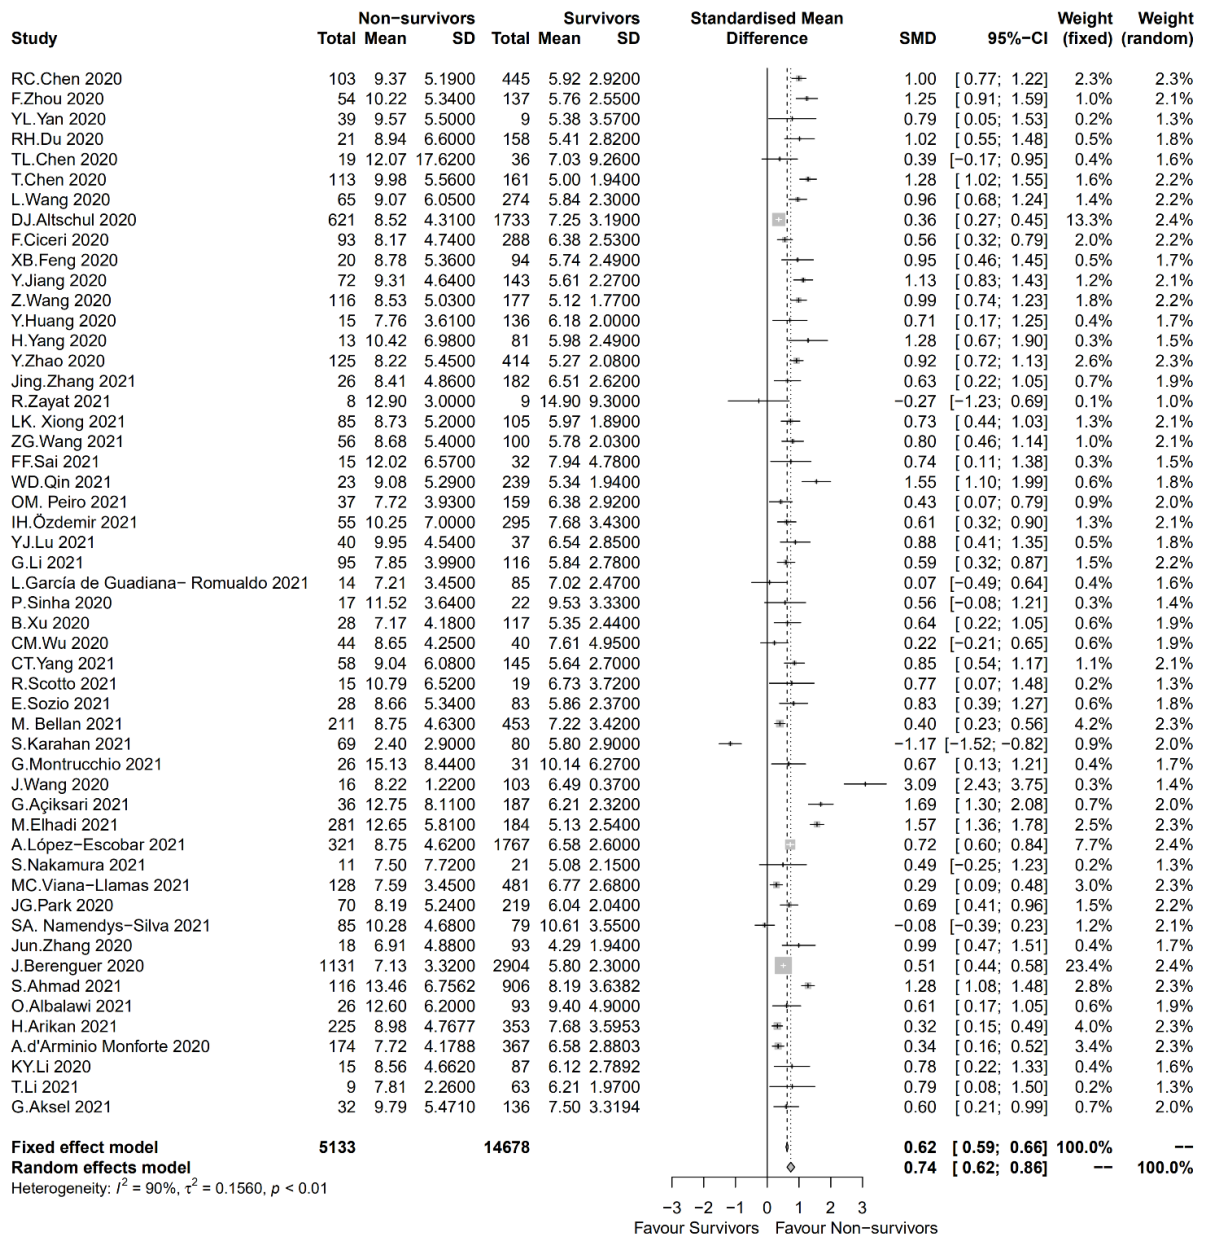

**(2) Neu**

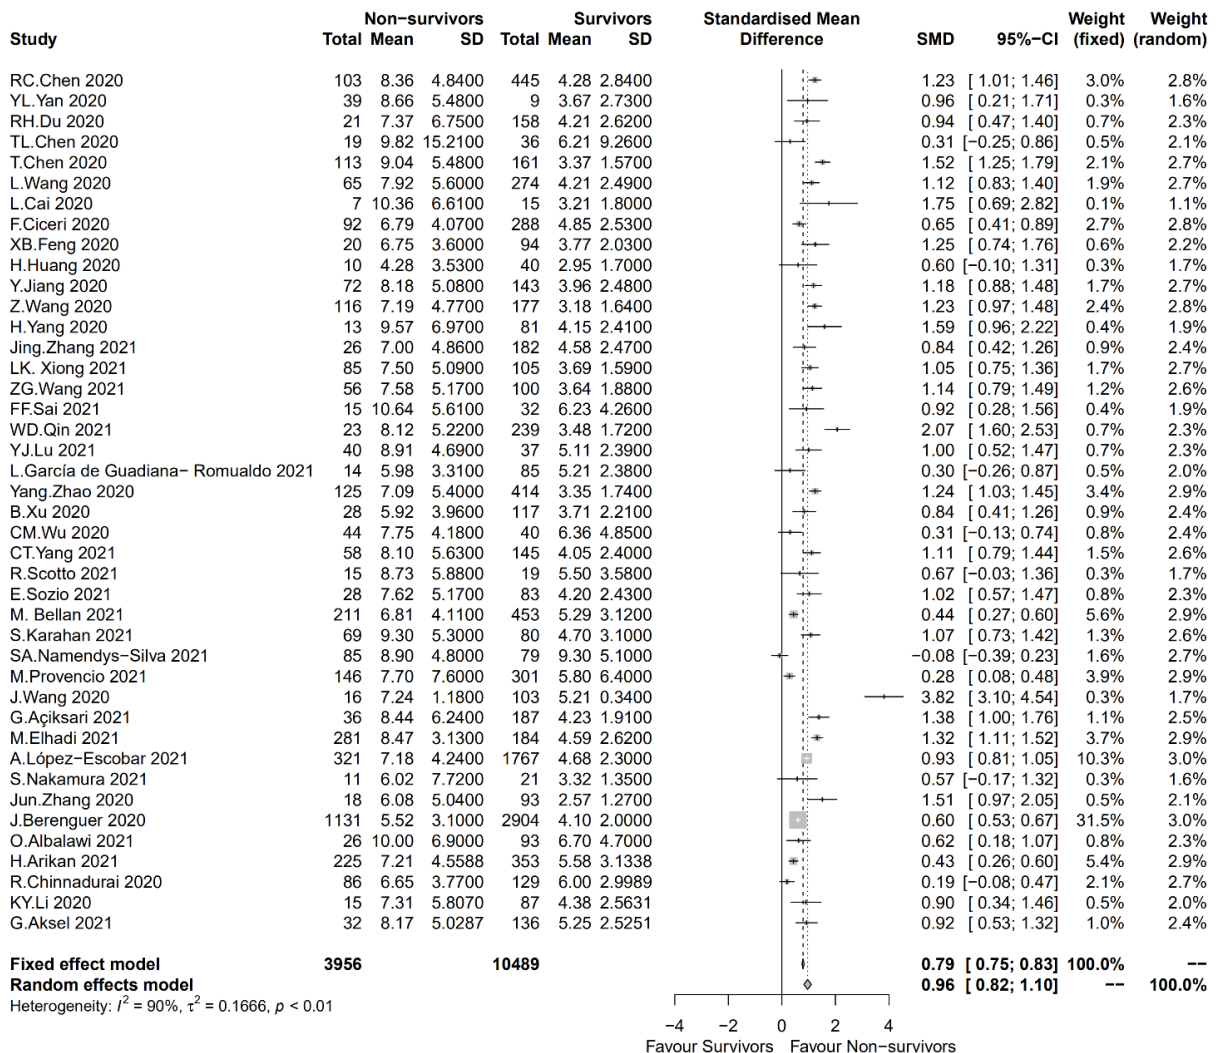

**Figure E3(B) (Continued)**

**(3) Lym**

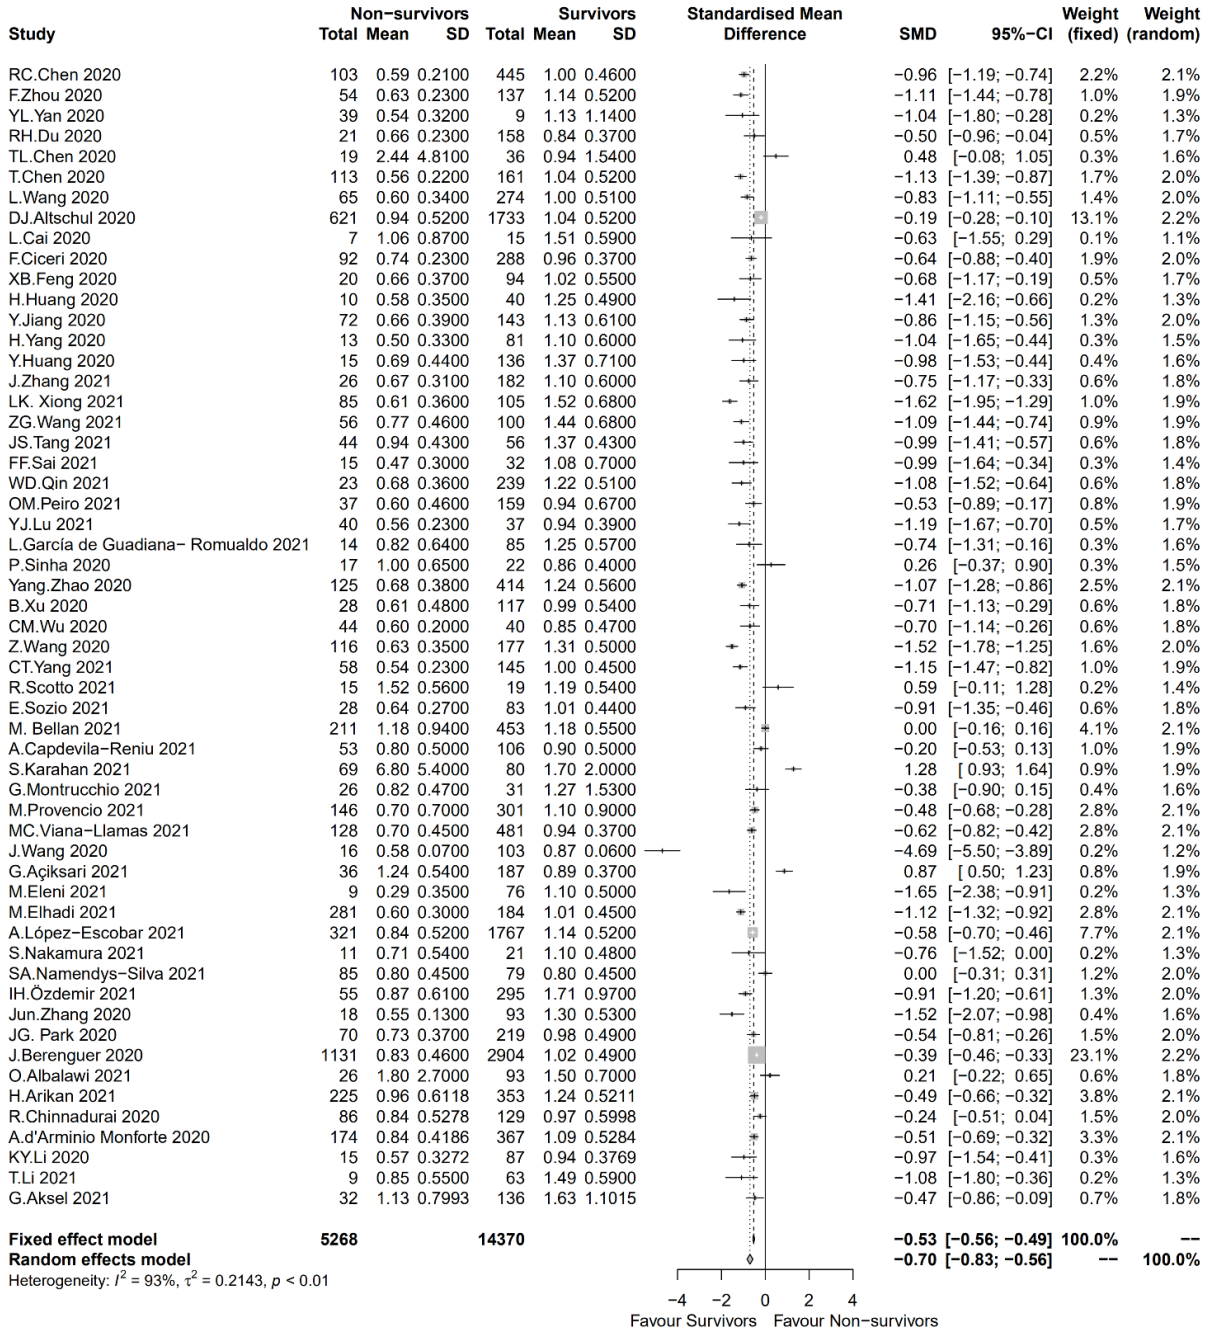

**(4) Mono**

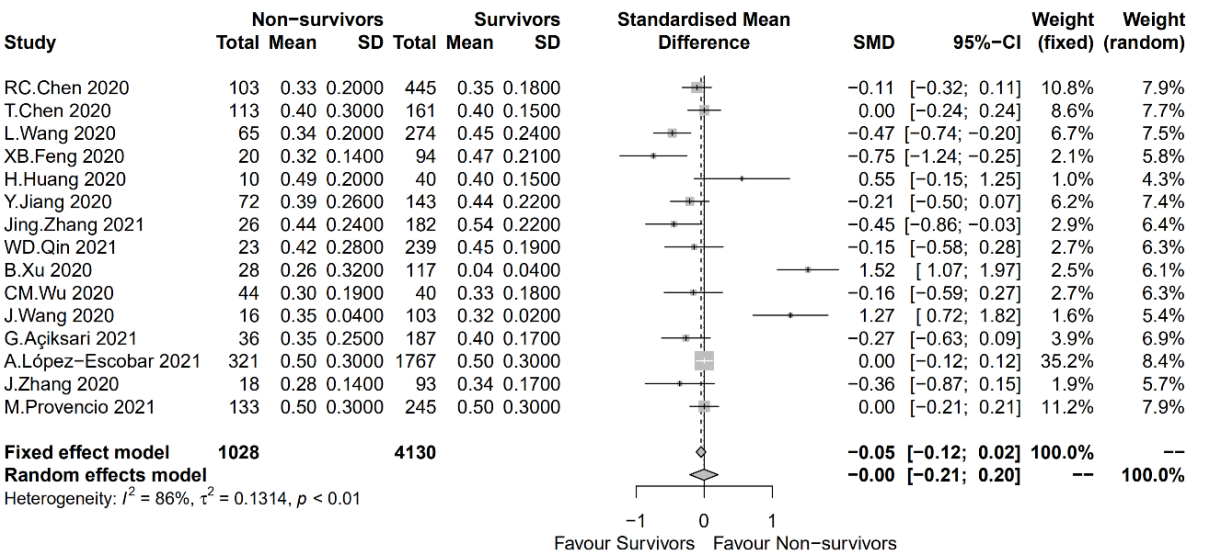

**(5) Eos**

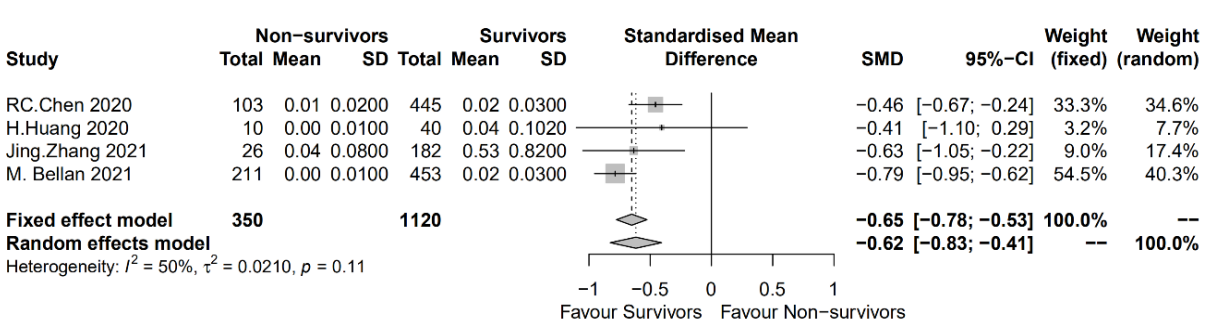

**Figure E3(B) (Continued)**

**(6) Bas**

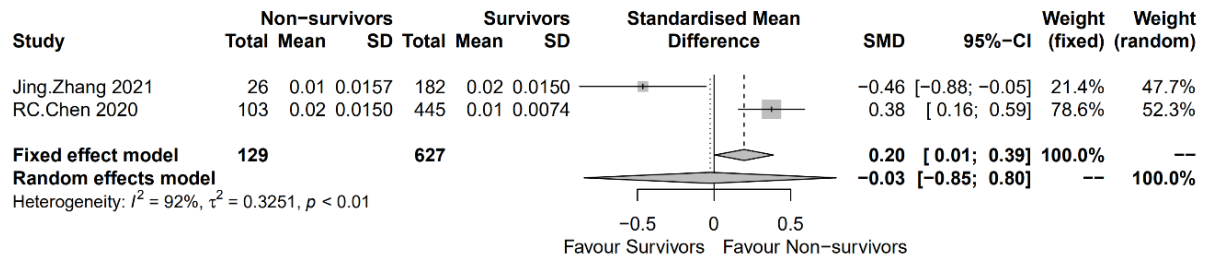

**(7) HB**

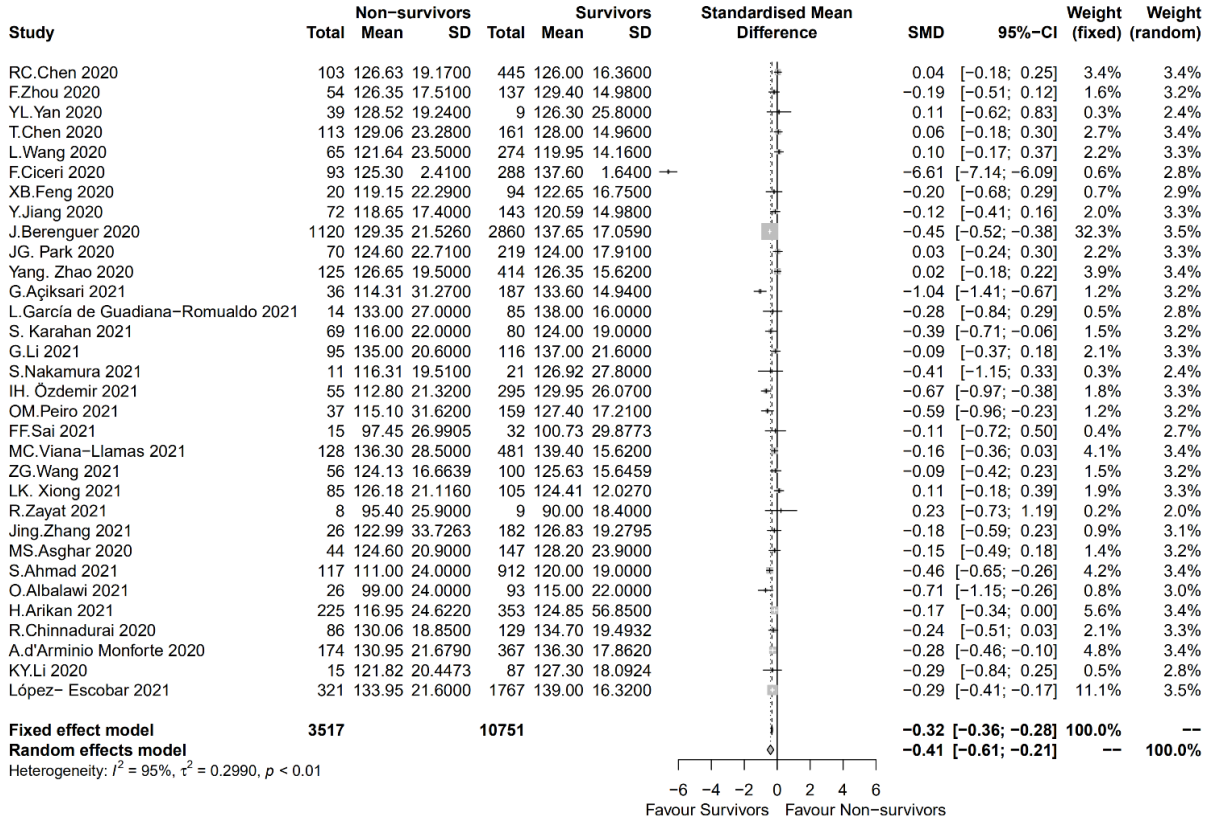

**(8) PLT**

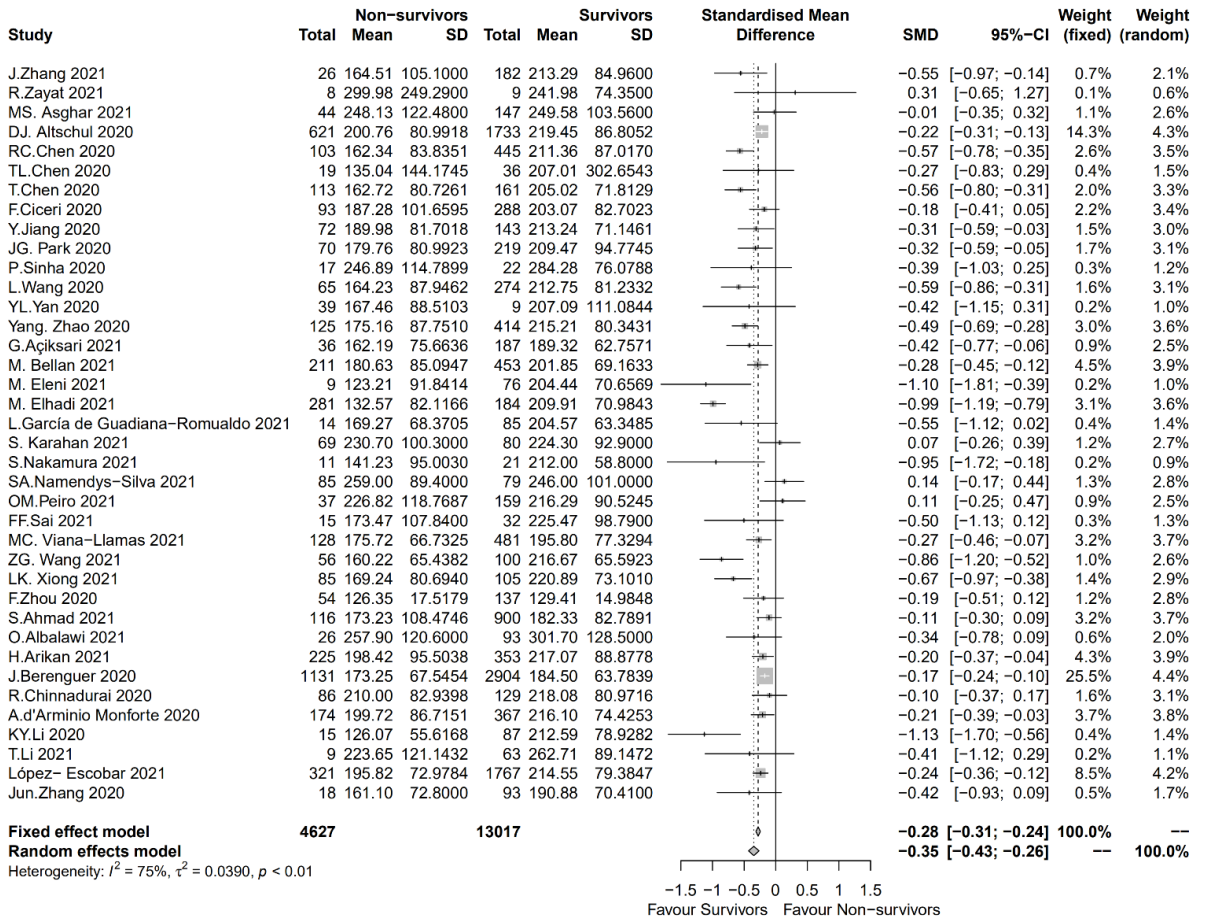

**Figure E3(B) (Continued)**

**(9) PLR**

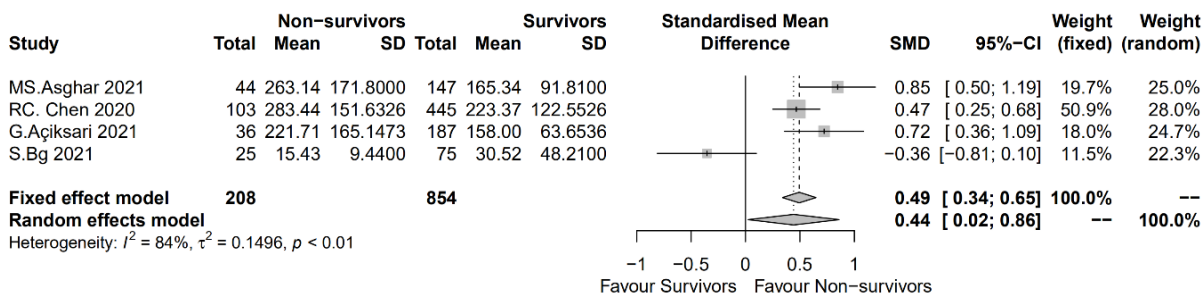

**(10) LMR**

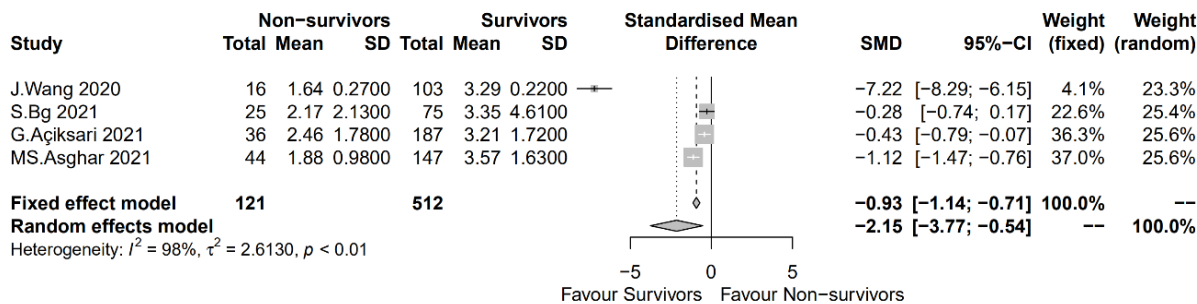

**(11) NLR**

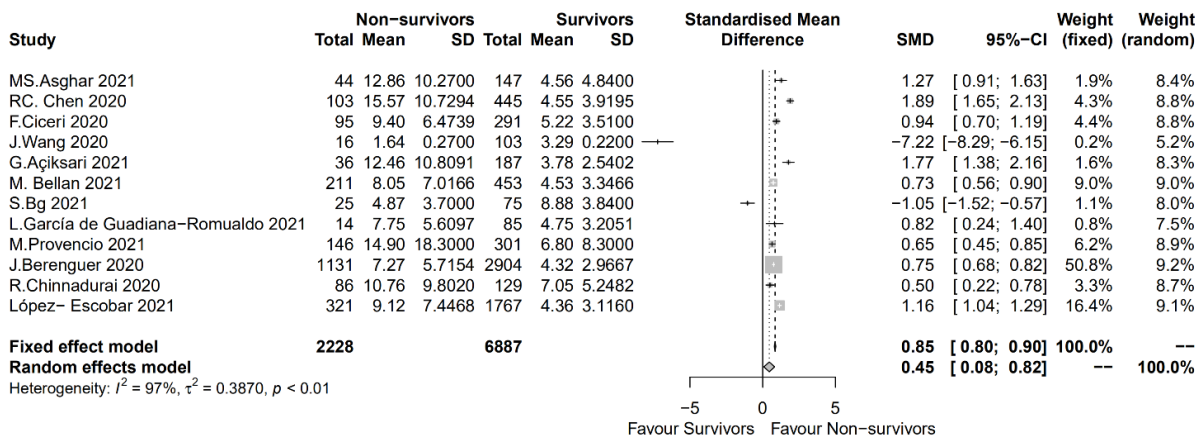

Supplement: 12016_2021_8908_MOESM3_ESM.pdf [file 12016_2021_8908_MOESM3_ESM.pdf]
