# Supplementary material
Source: PubMed Central journal article supplement (PMC8763427)

**Figure E6 (A) Forest plots of biochemical parameters in severe and non-severe patients of COVID-19**

**(1) CK**

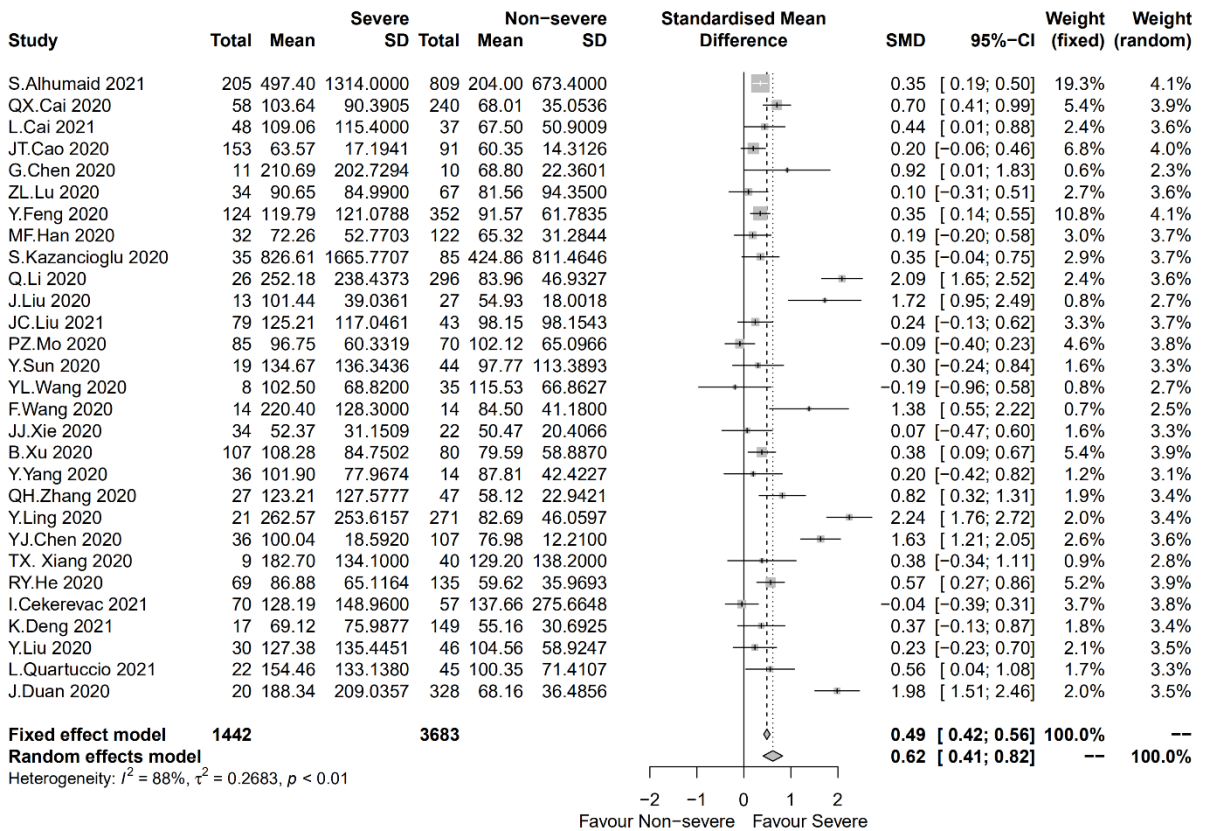

**(2) cTnI**

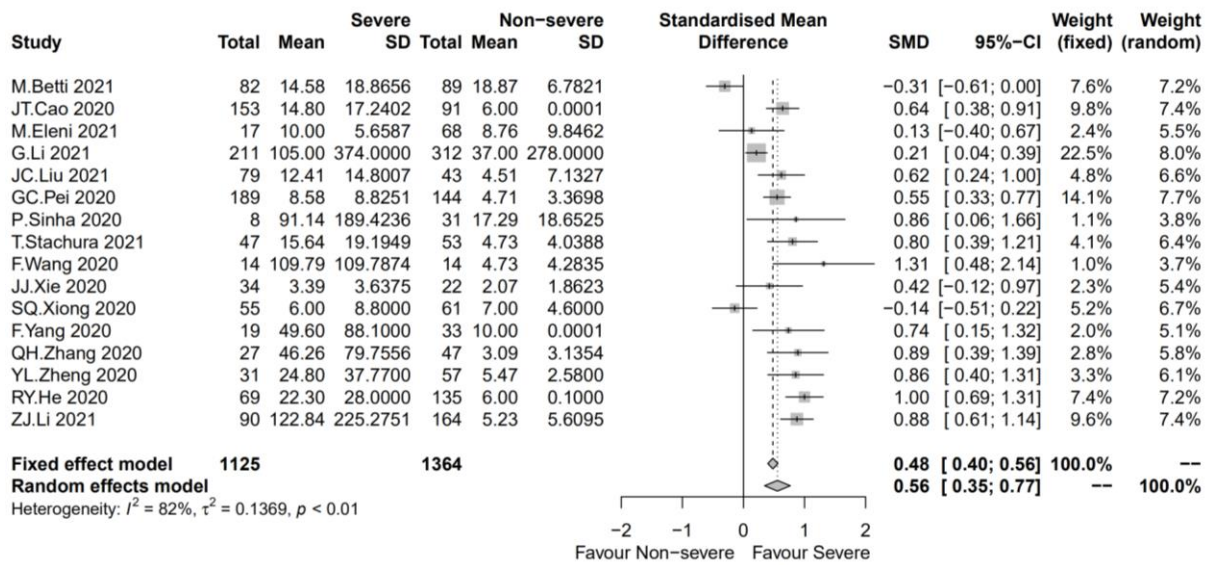

**(3) ALB**

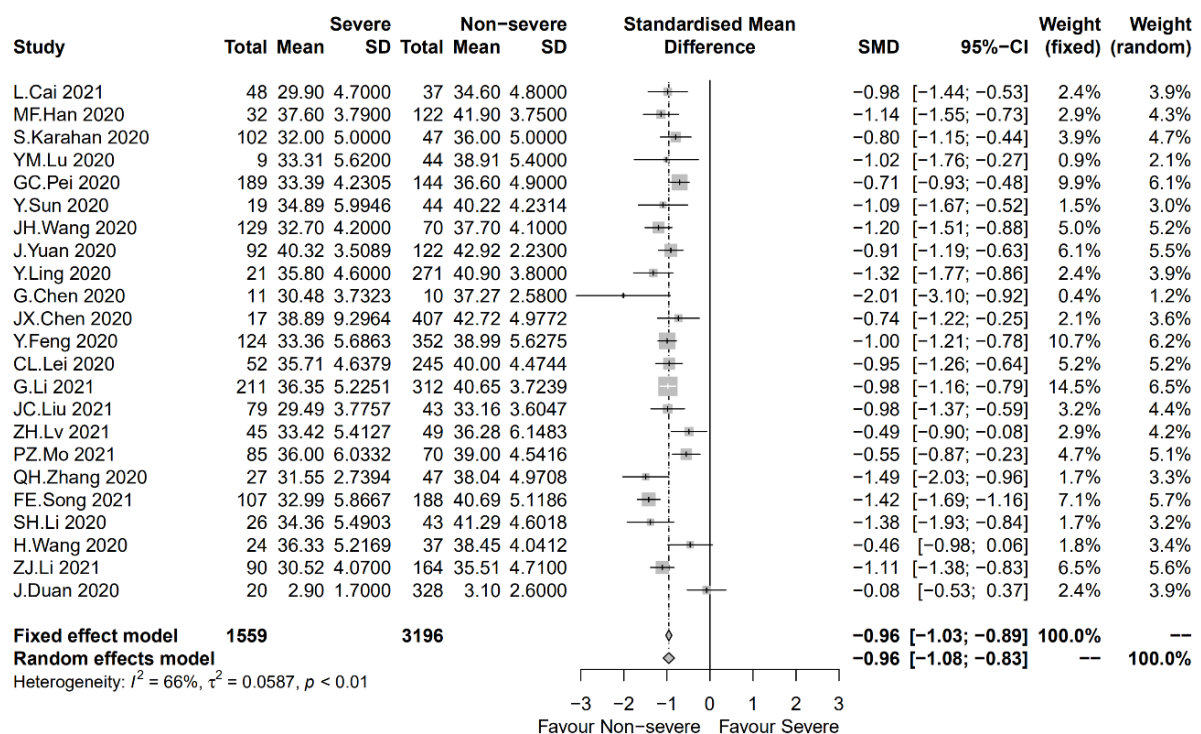

**Figure E6 (A) (Continued)**

**(4) AST**

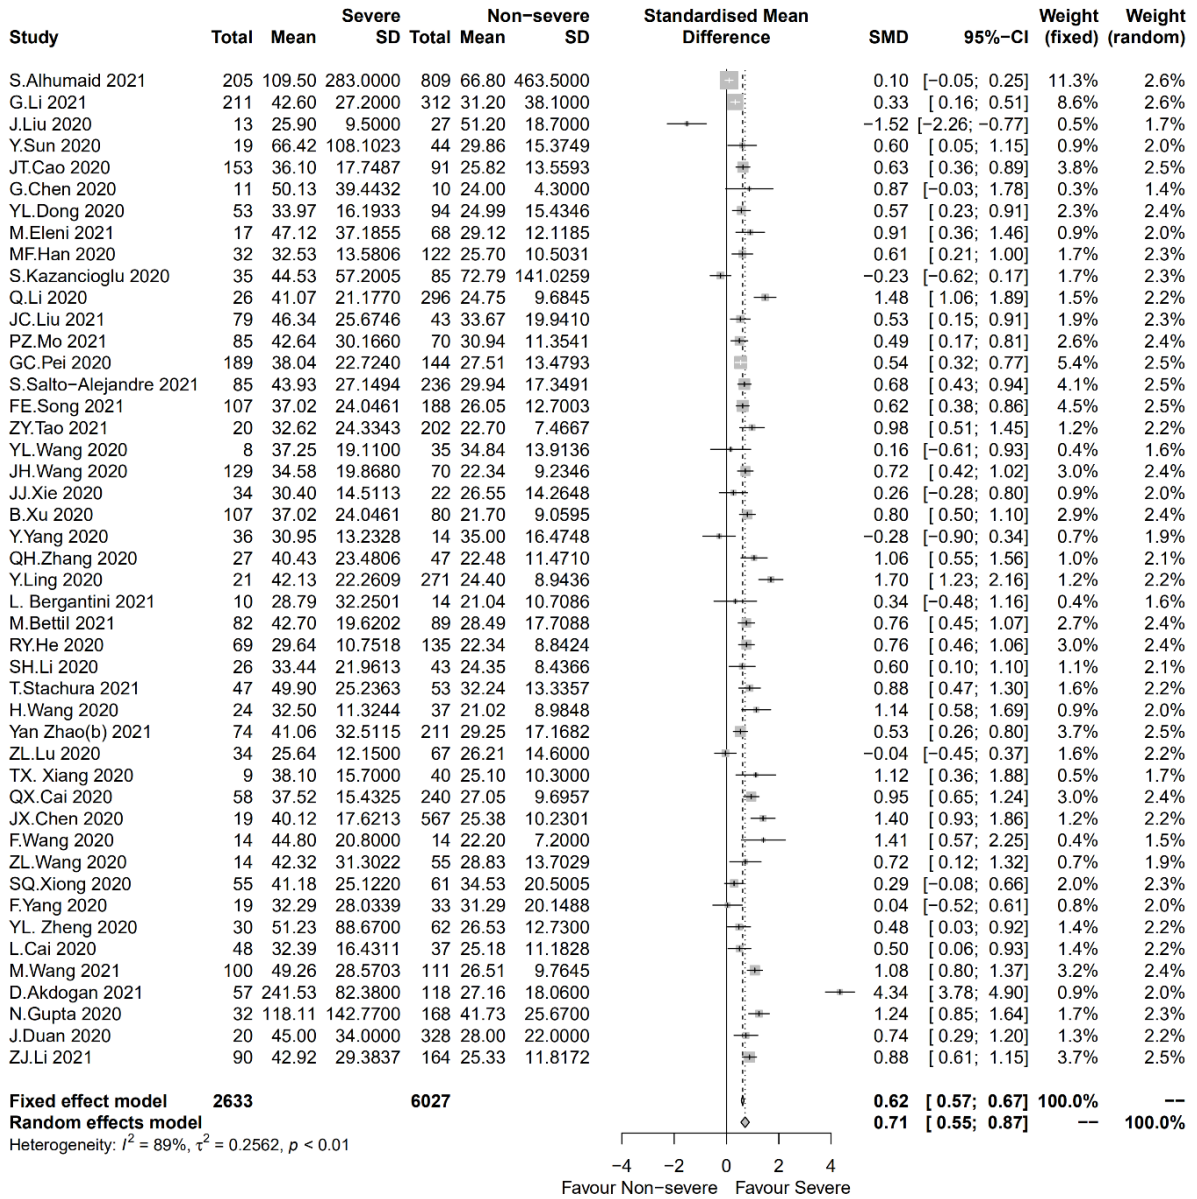

**(5) ALT**

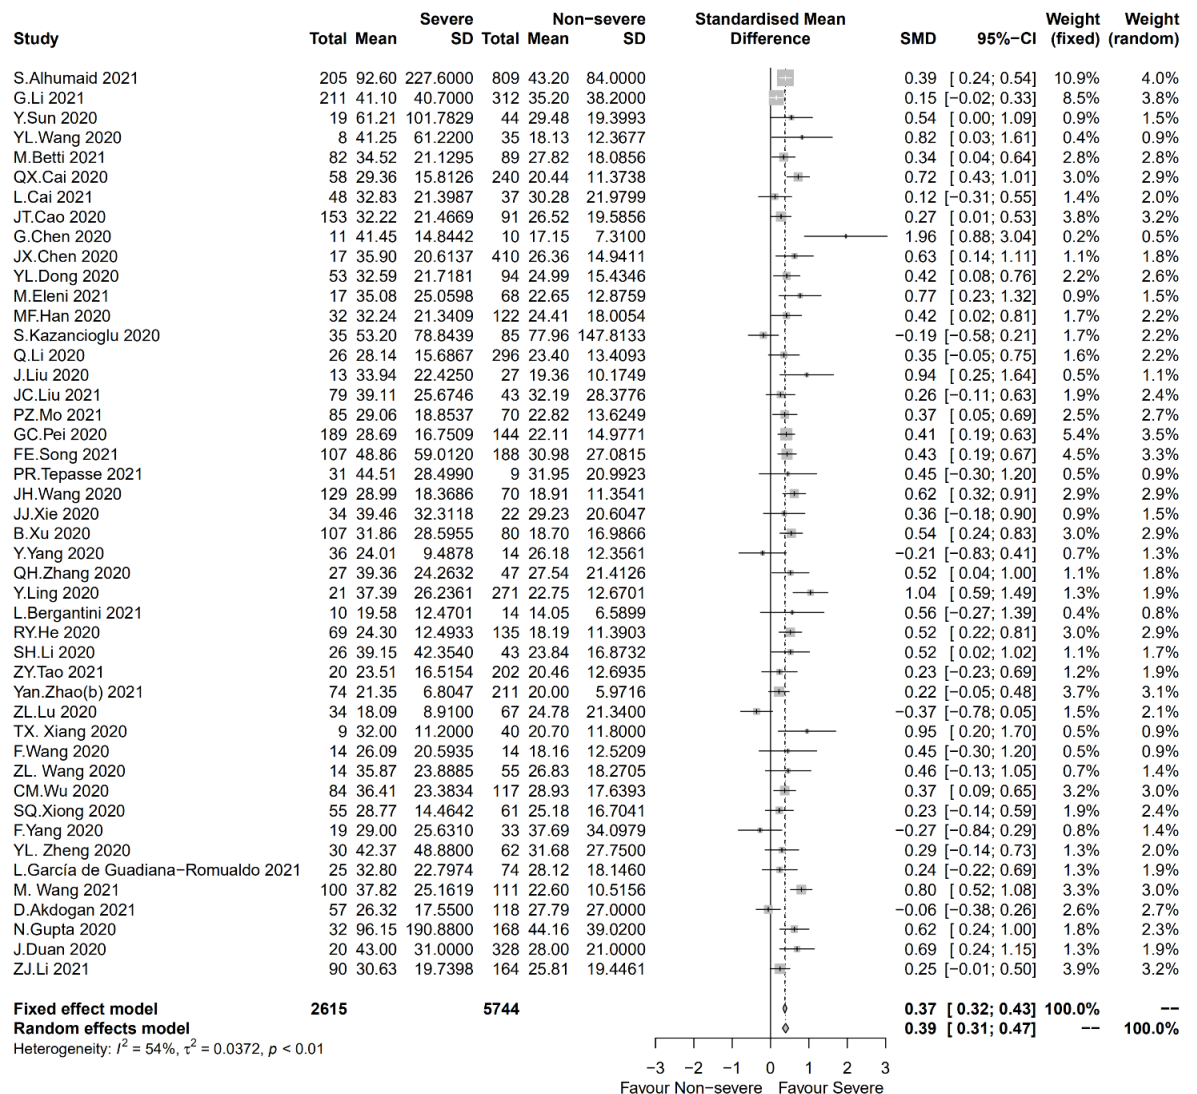

Figure E6 (A) (Continued)

(6) LDH

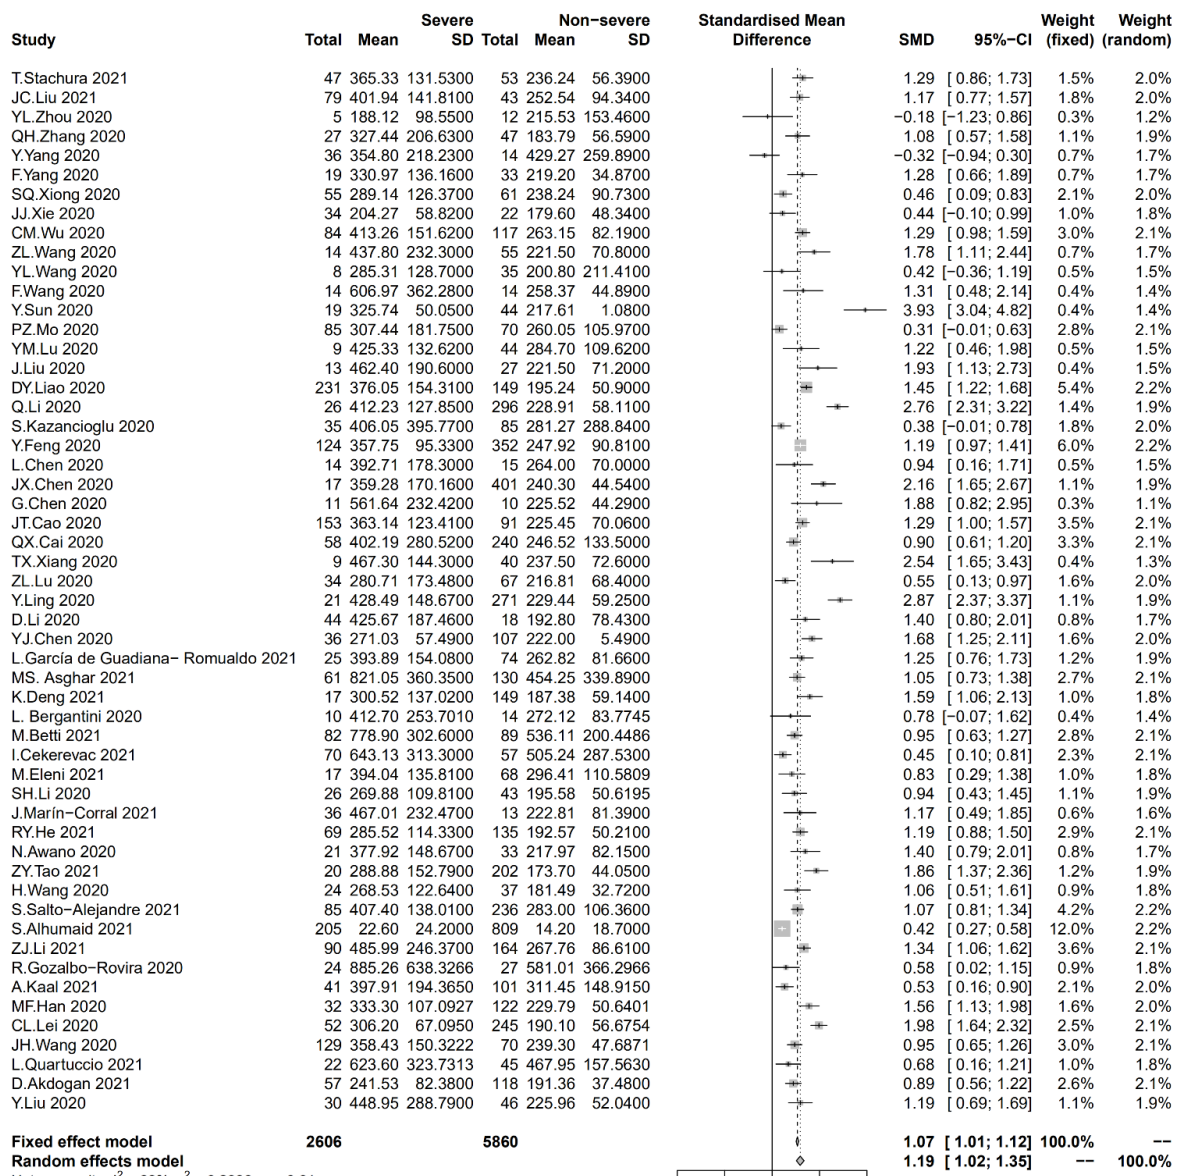

(7) TBIL

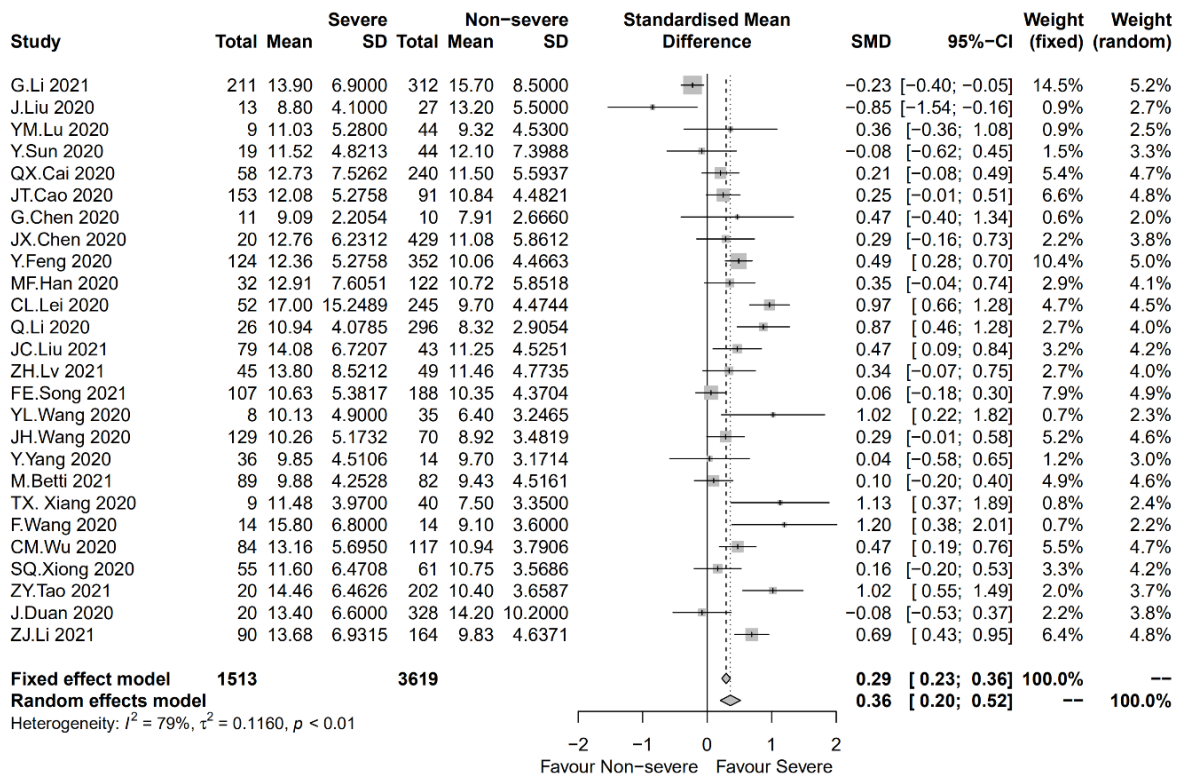

(8) MYO

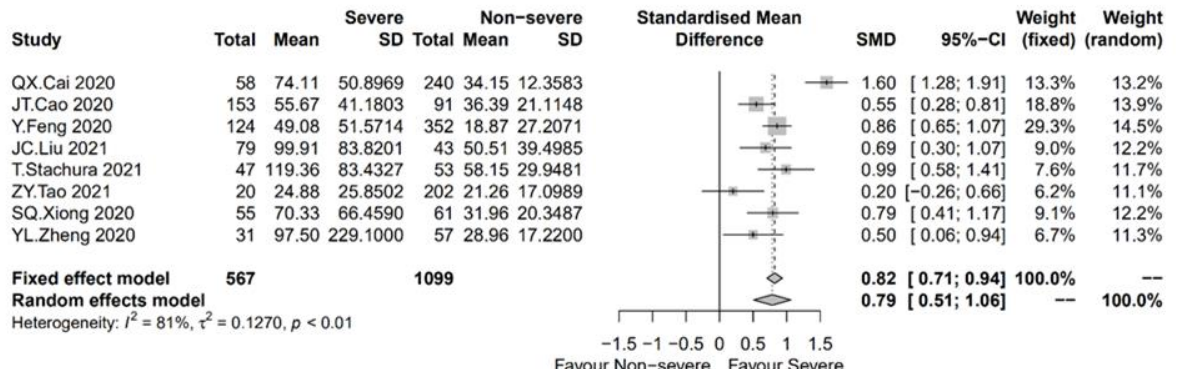

Figure E6 (A) (Continued)

(9) CRN

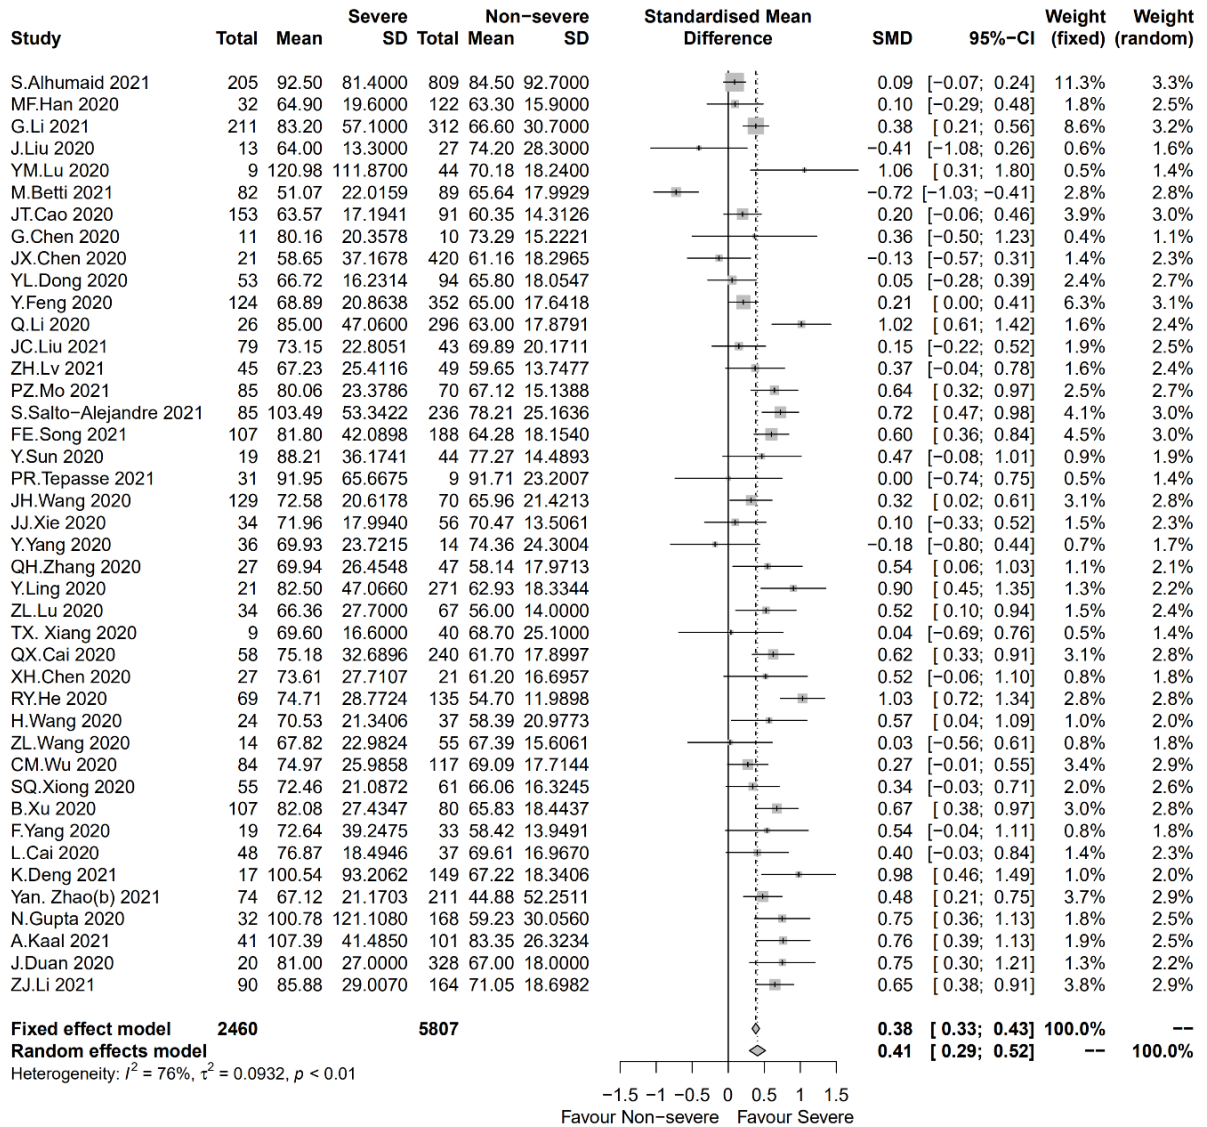

(10) BUN

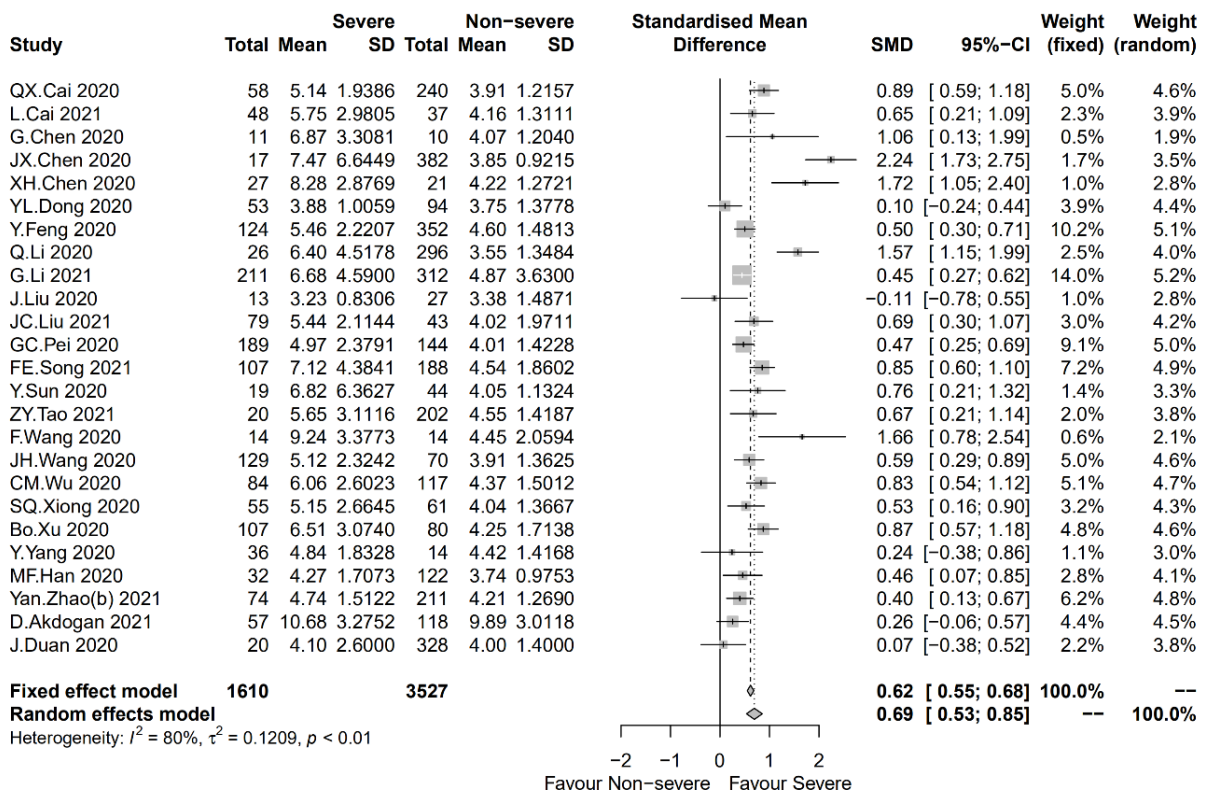

**Figure E6 (B) Forest plots of biochemical parameters in non-survivors and survivors of COVID-19**

**(1) CK**

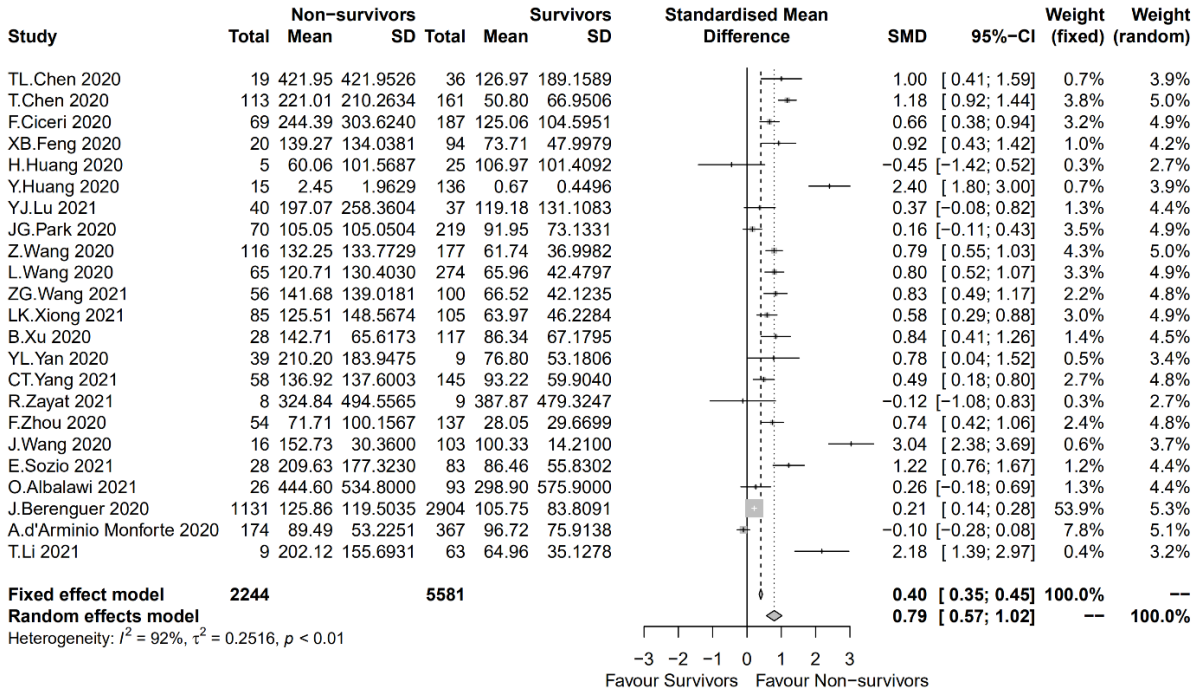

**(2) cTnI**

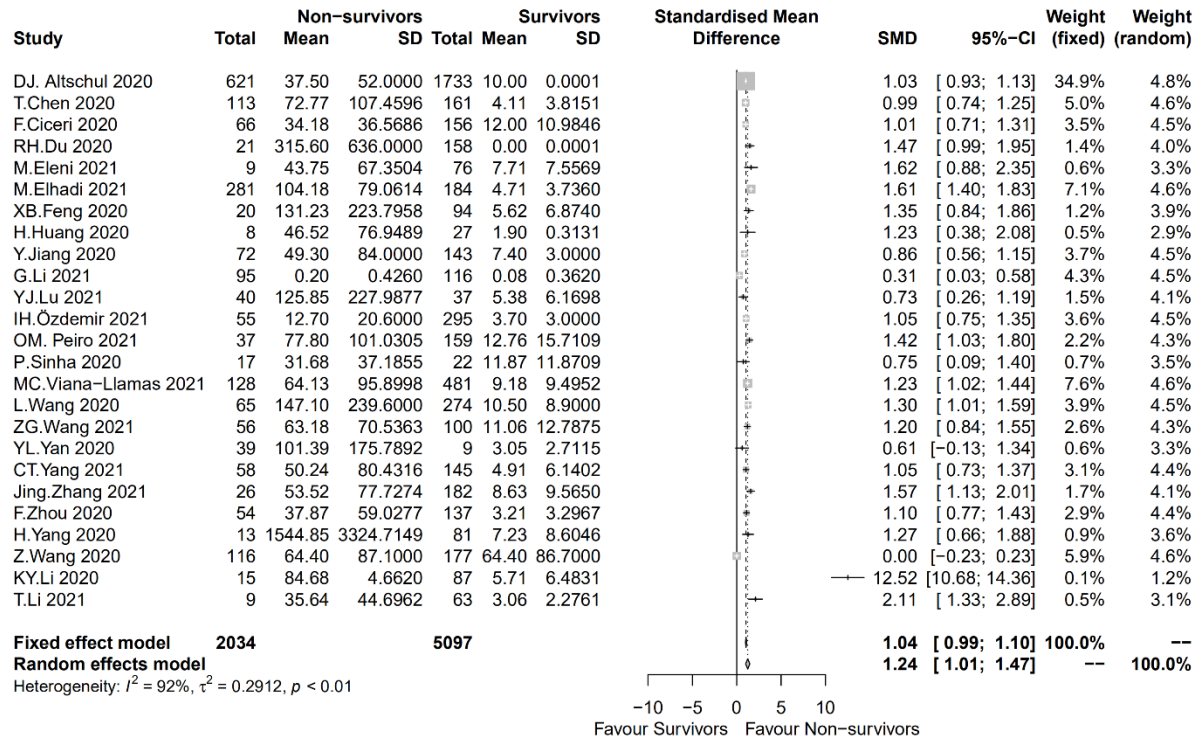

**(3) ALB**

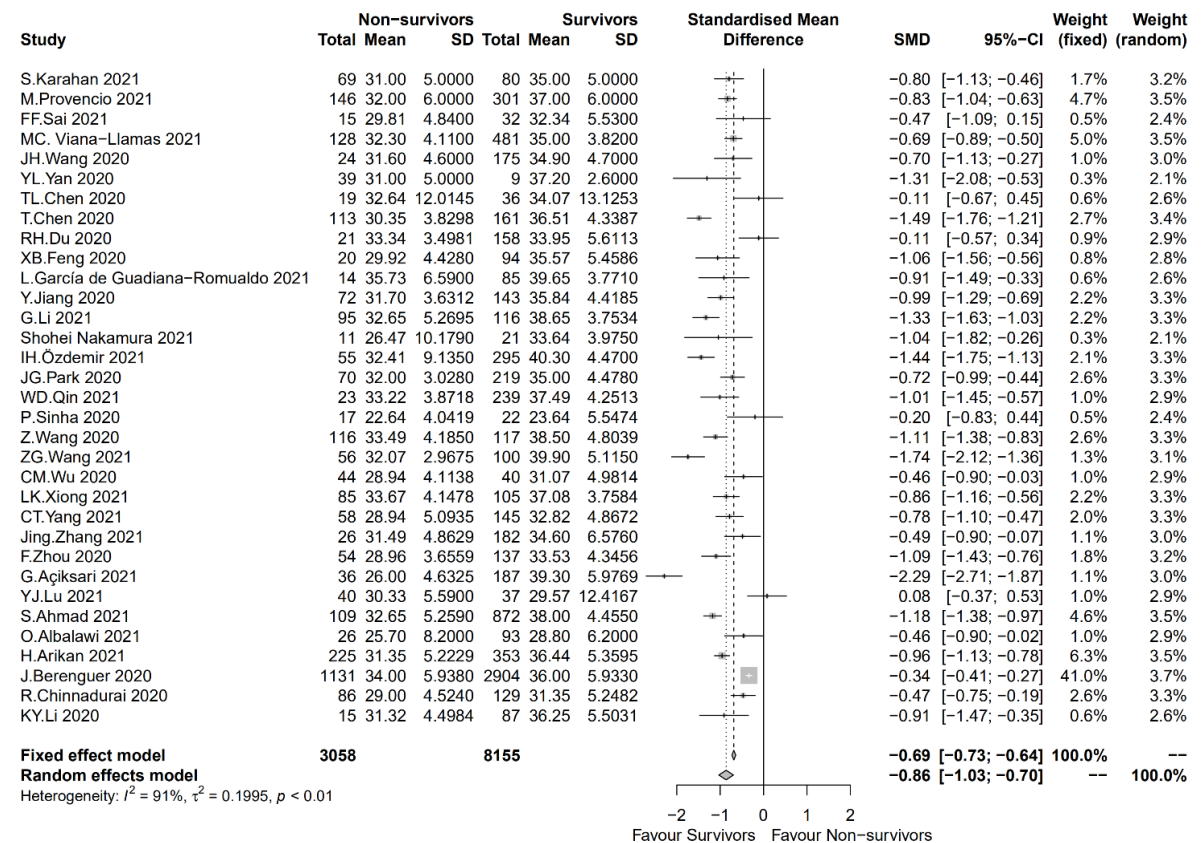

Figure E6 (B) (Continued)

(4) LDH

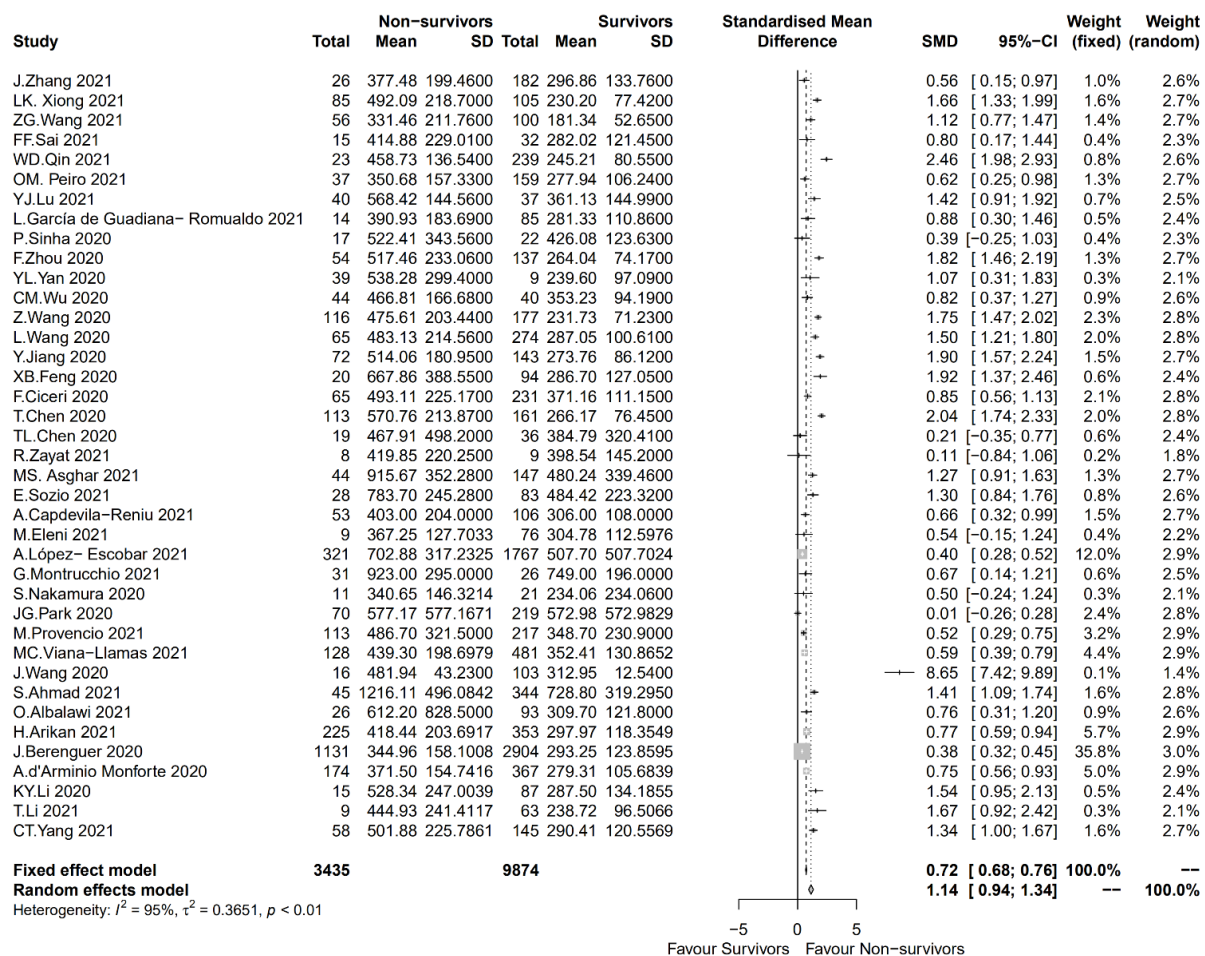

(5) AST

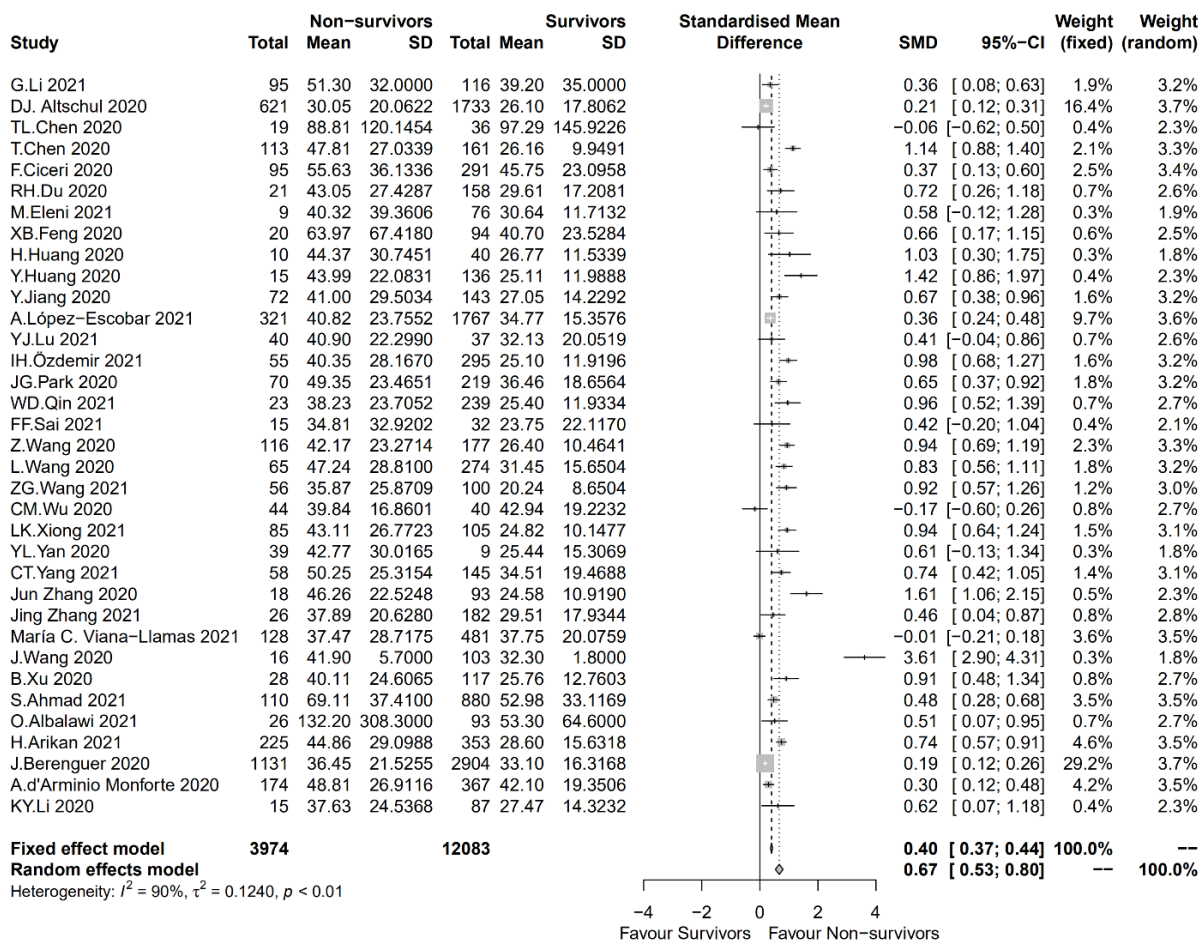

(6) MYO

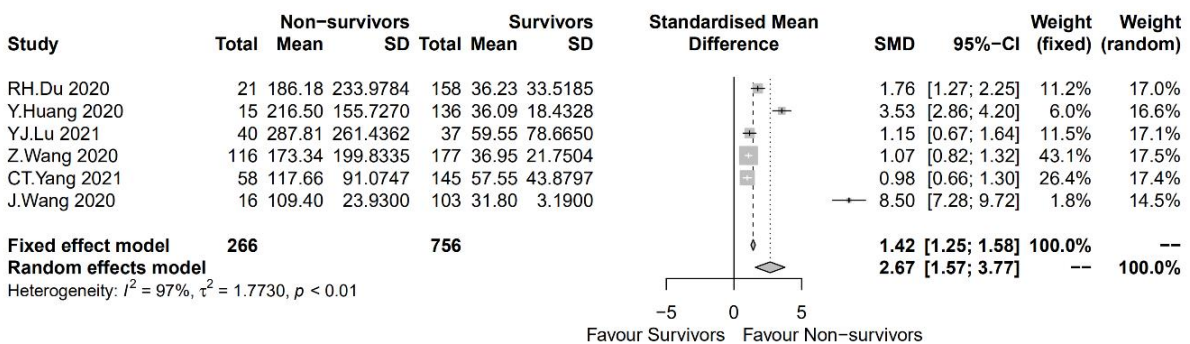

Figure E6 (B) (Continued)

(7) ALT

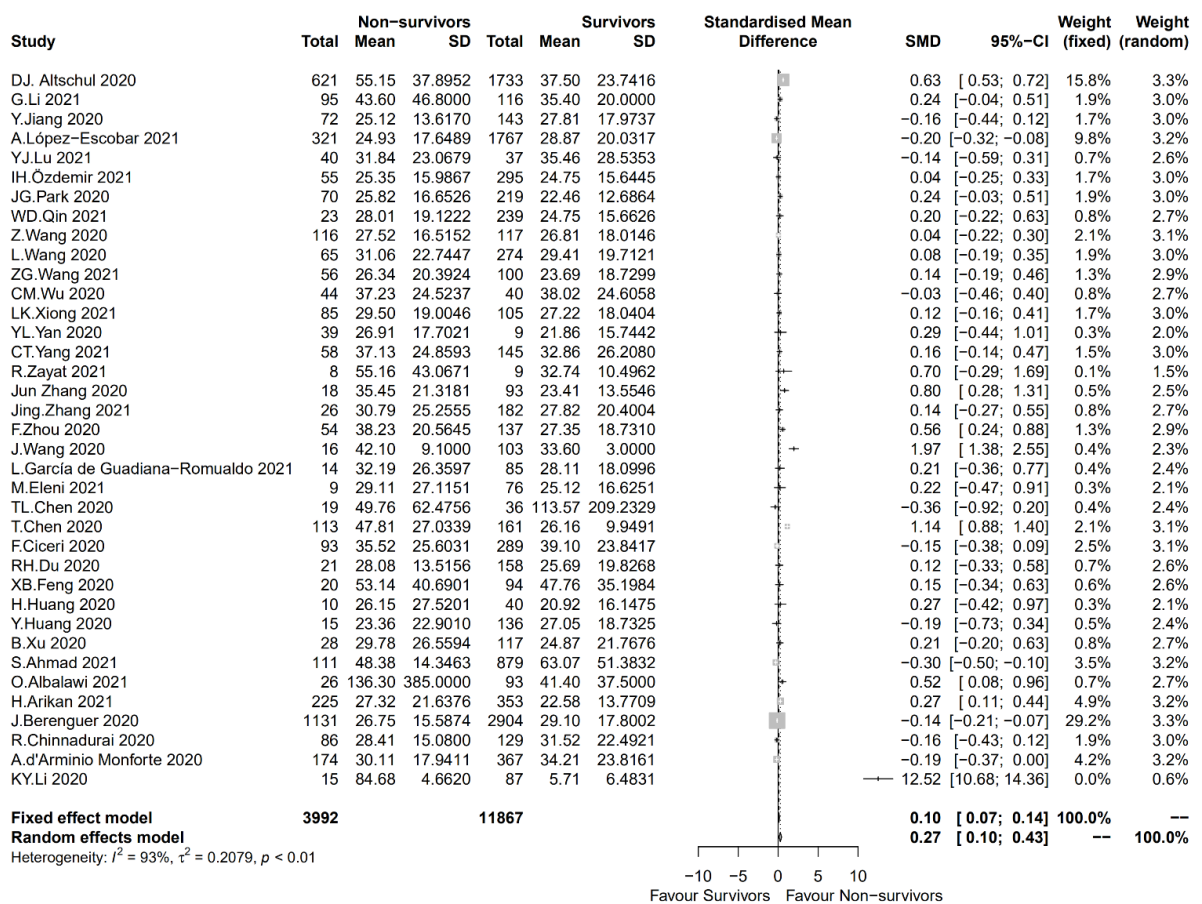

(8) TBIL

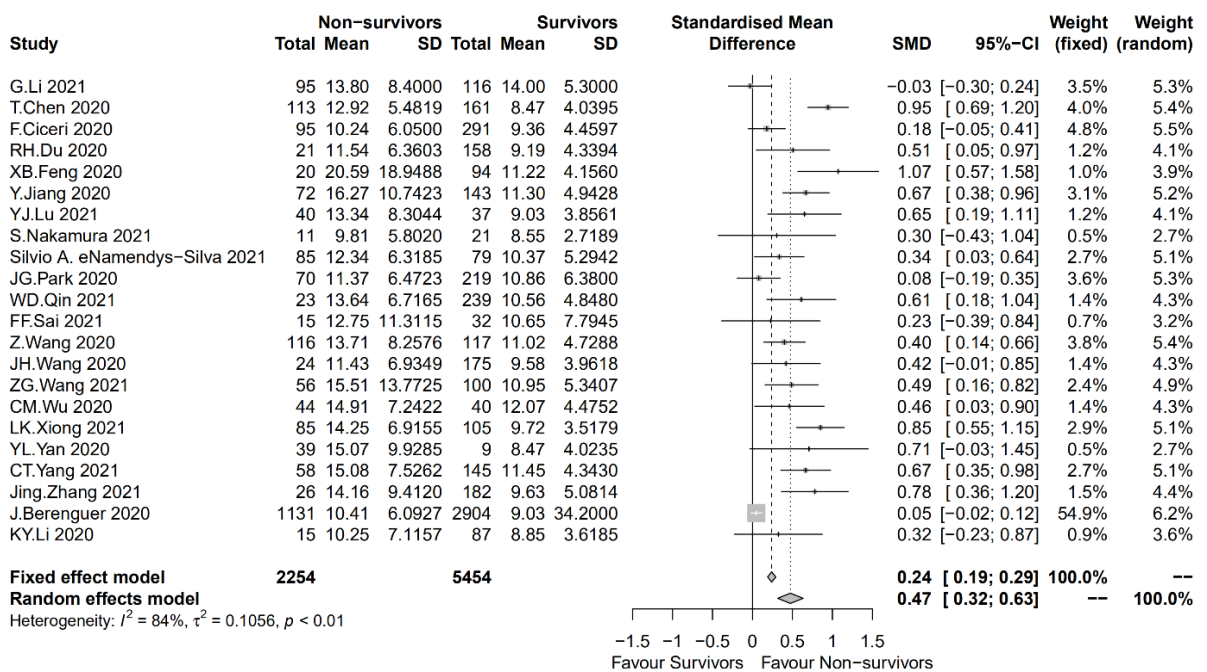

Figure E6 (B) (Continued)

(9) CRN

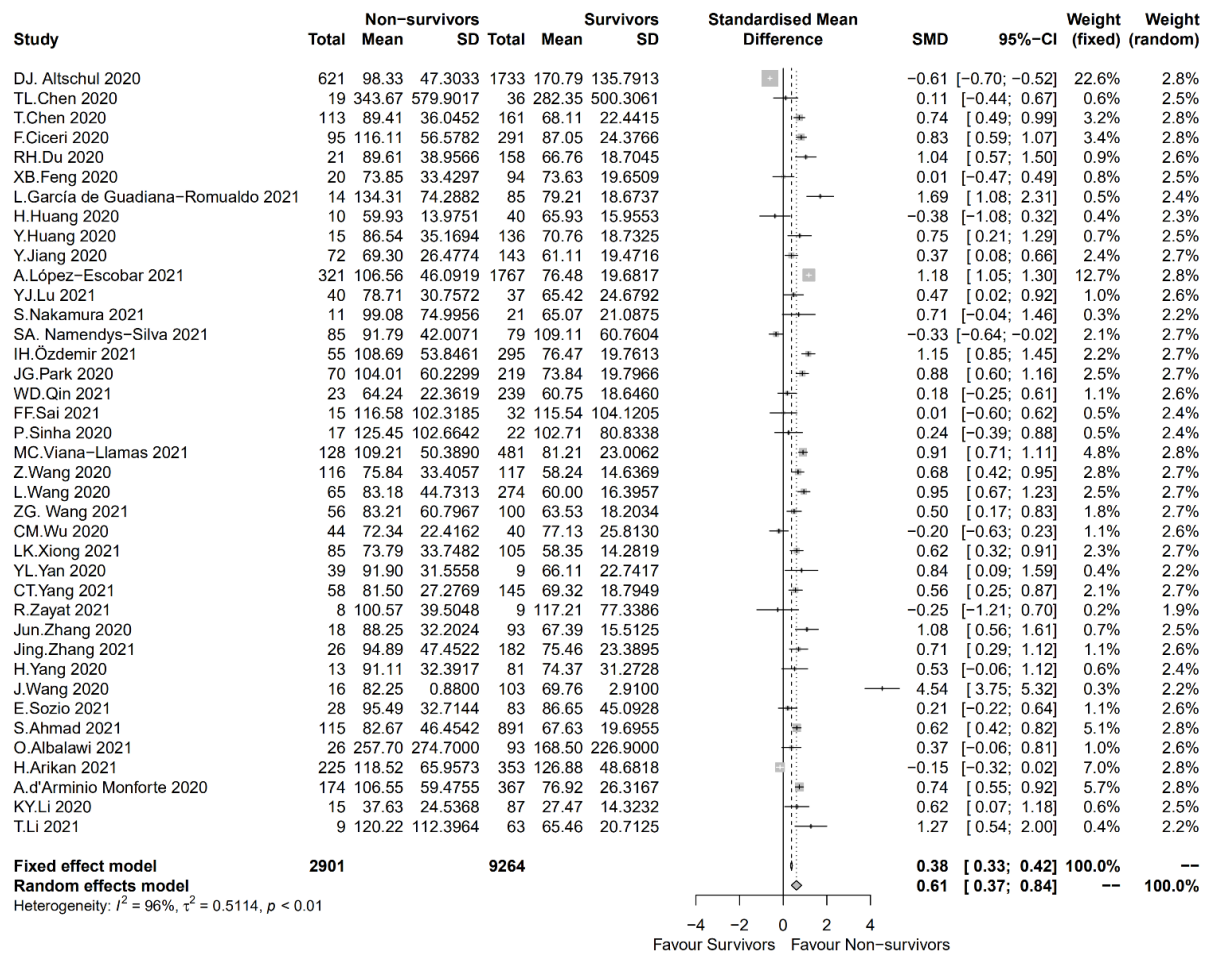

(10) BUN

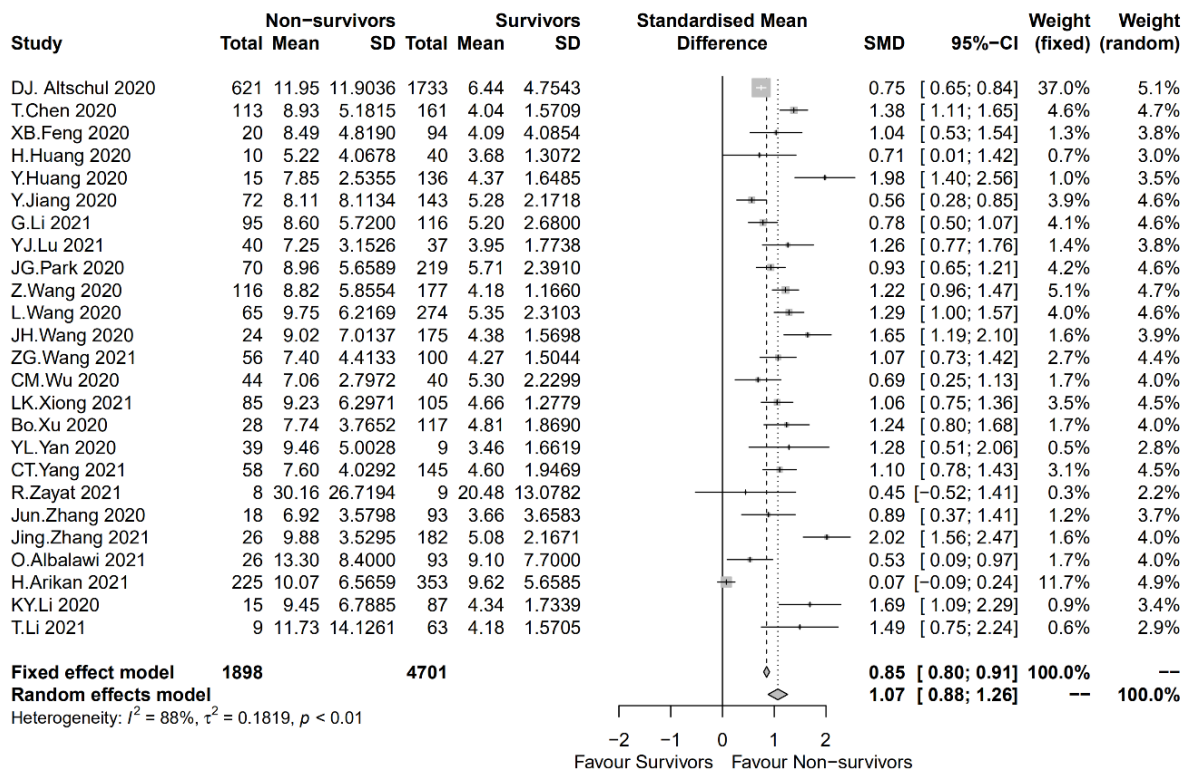

Supplement: 12016_2021_8908_MOESM6_ESM.pdf [file 12016_2021_8908_MOESM6_ESM.pdf]
