# Supplementary material
Source: PubMed Central journal article supplement (PMC8763427)

# Figure E9 (A) Sensitivity analysis of immunological parameters in severe and non-severe patients of COVID-19

## (1) IL-1 $\beta$

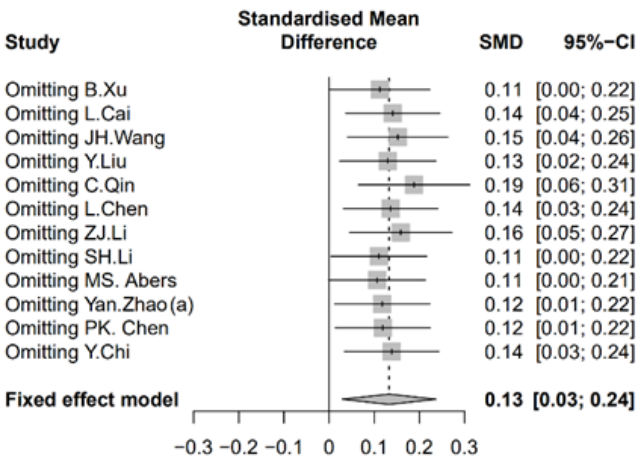

## (2) IL-2

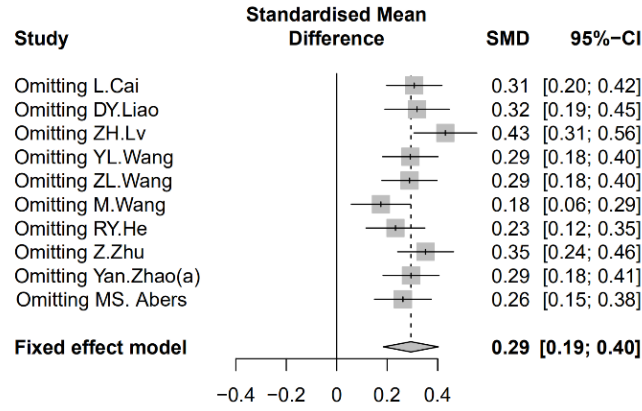

## (3) IL-4

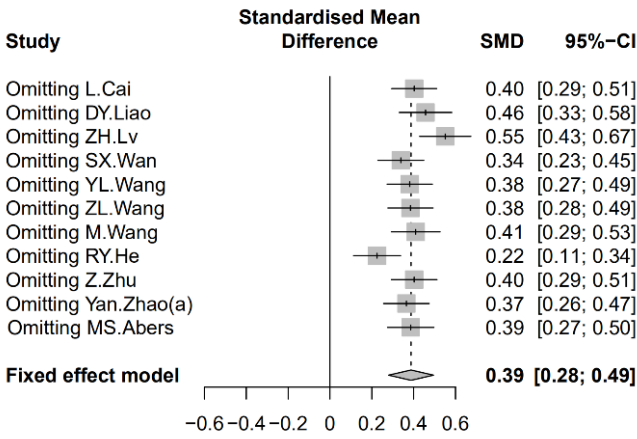

## (4) IL-8

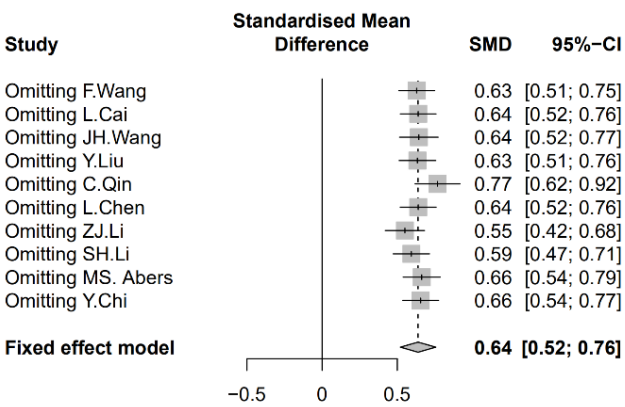

## (5) IL-18

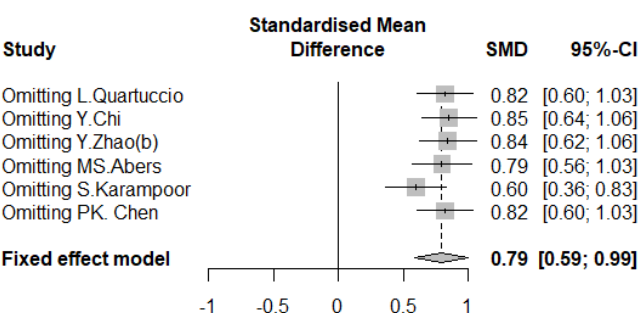

## (6) IL-1Ra

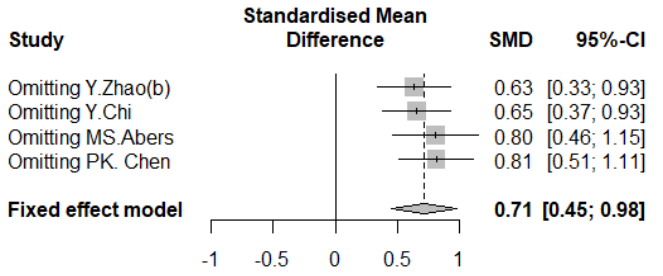

## (7) IL-2R

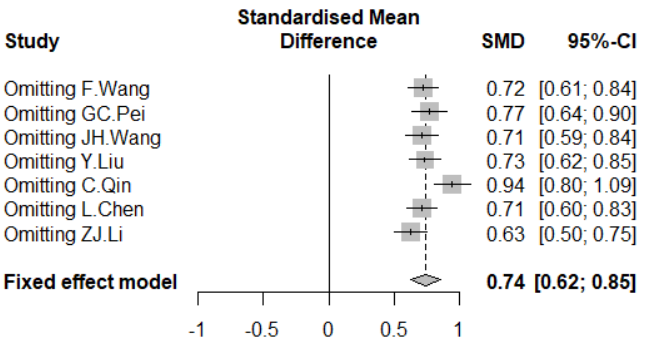

## (8) IL-6

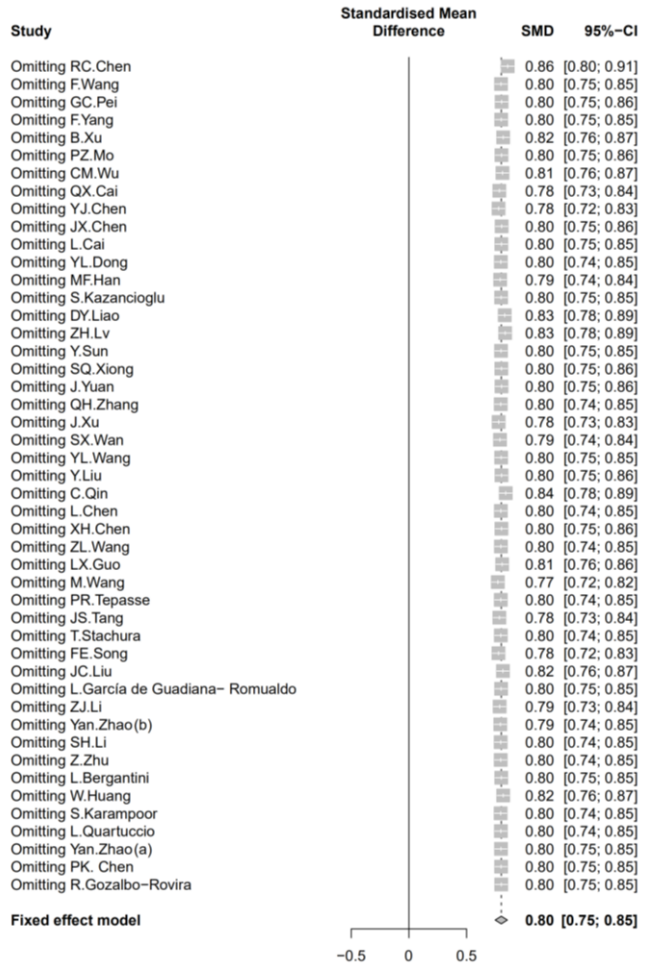

## (9) IFN- $\gamma$

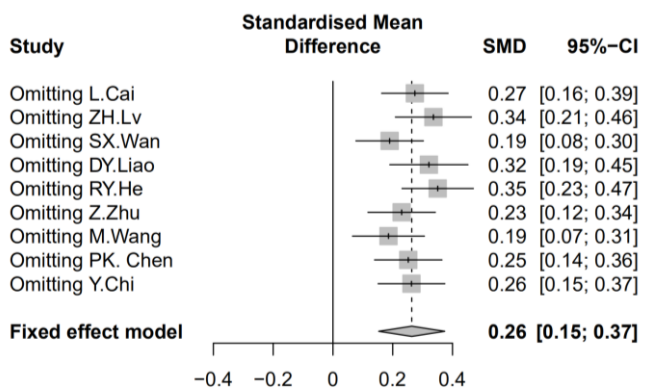

# Figure E9 (A) (Continued)

## (10) TNF- $\alpha$

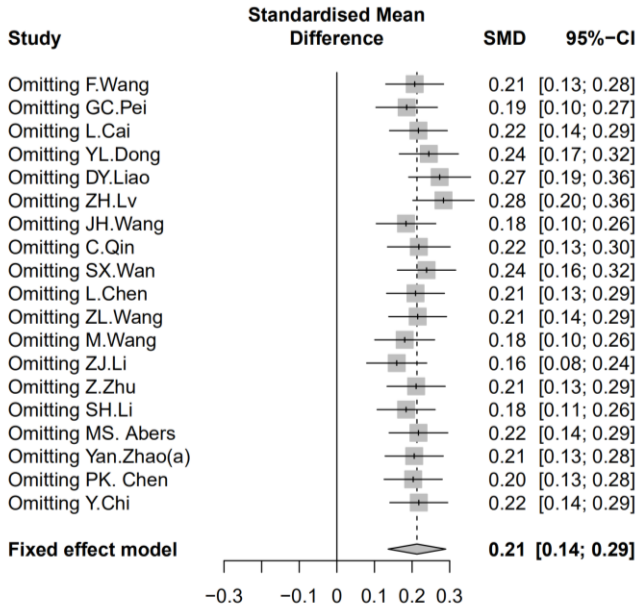

## (11) IL-10

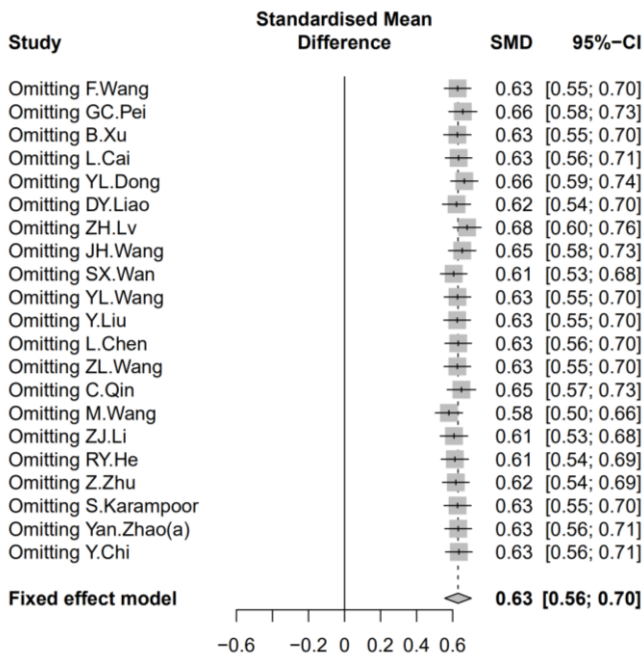

## (12) CD3+T(ab)

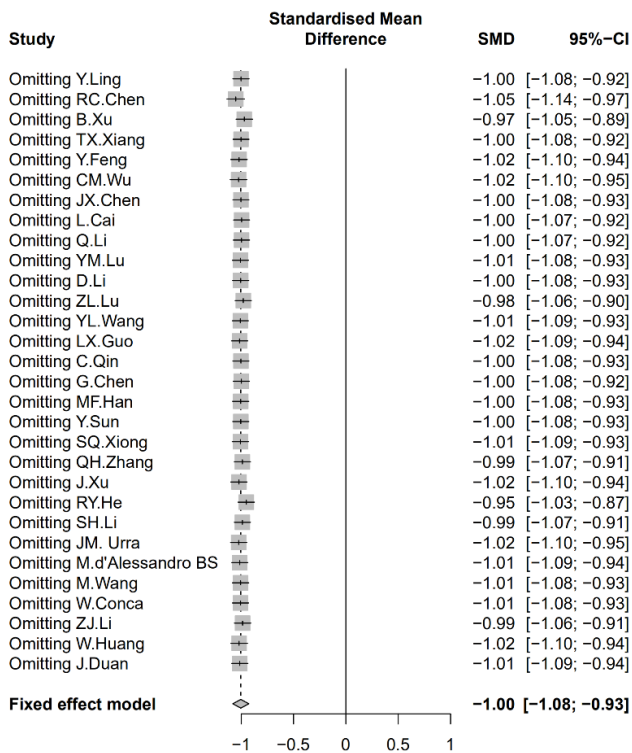

## (13) CD3+T(%)

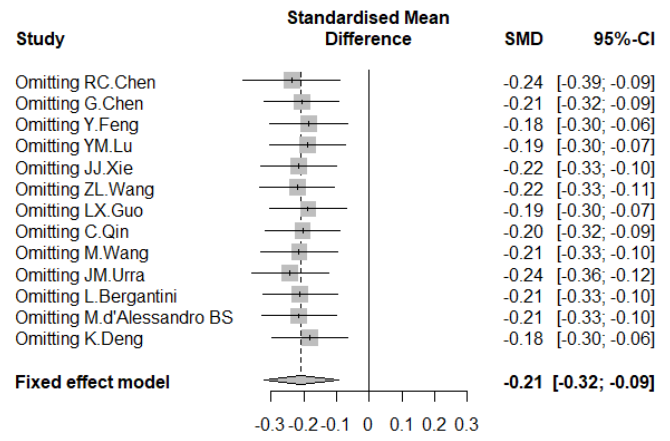

## (14) CD4+T(ab)

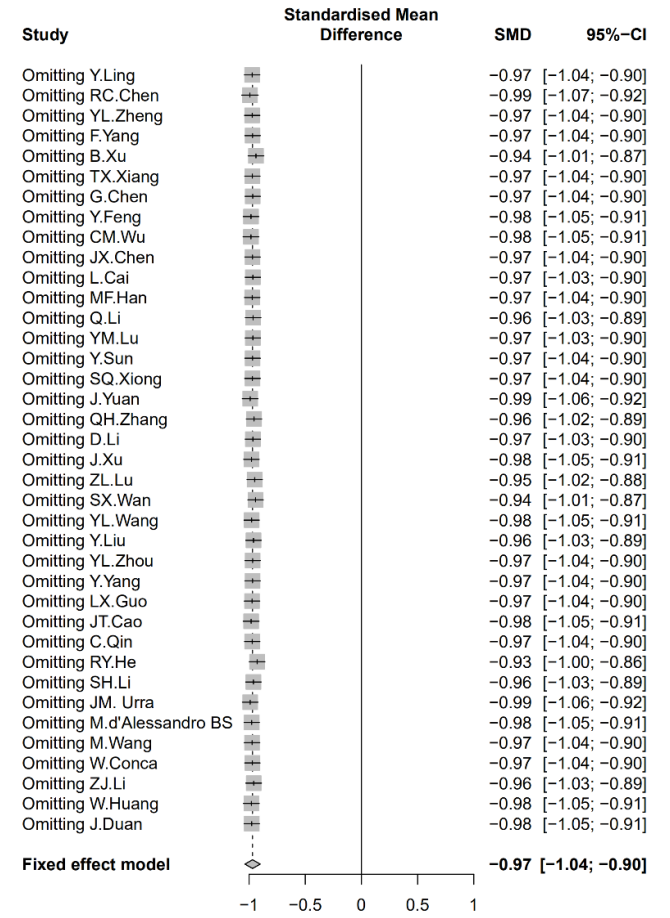

## (15) CD4+T(%)

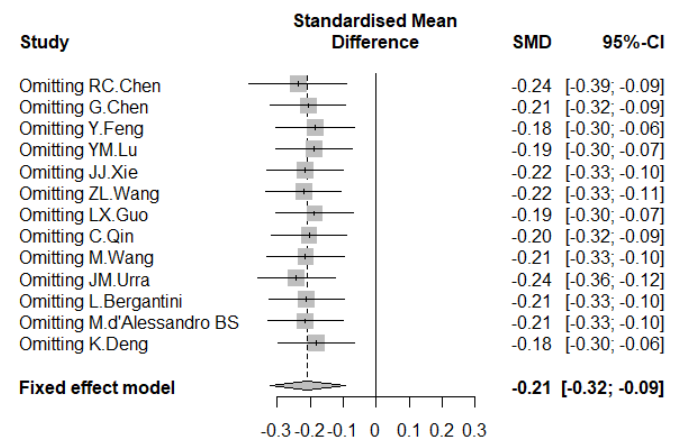

## (16) CD8+T(%)

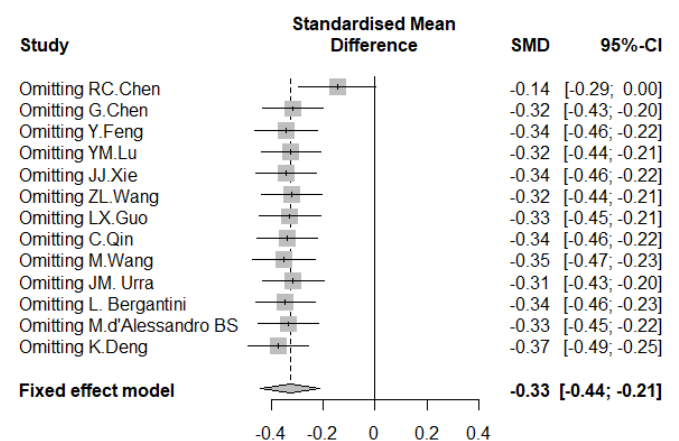

# Figure E9 (A) (Continued)

## (17) CD8+T(ab)

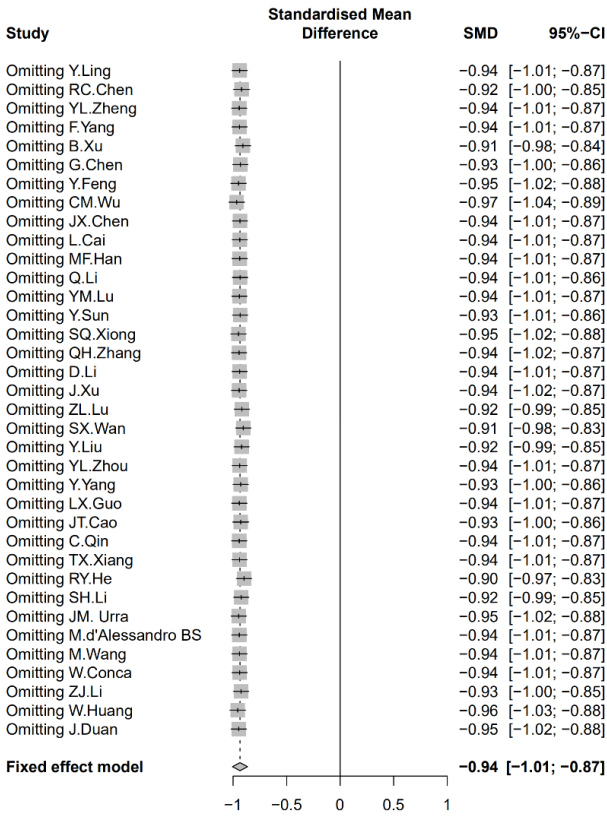

## (18) CD4+T/CD8+T ratio

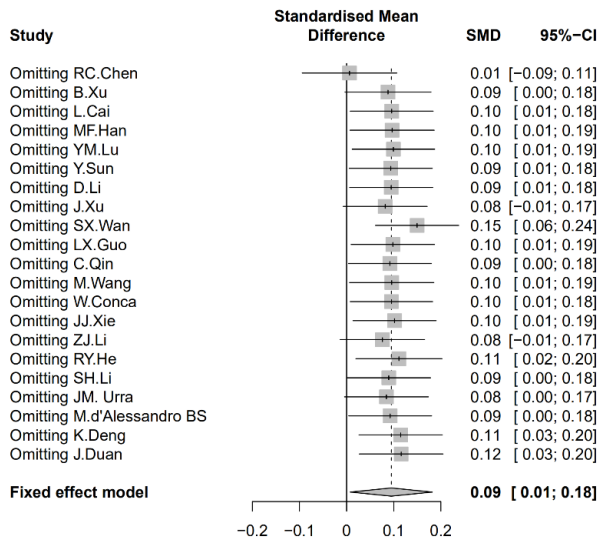

## (19) B cell(ab)

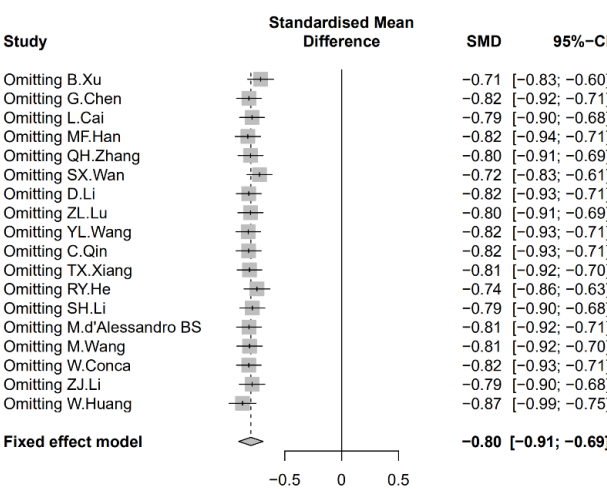

## (20) IgG

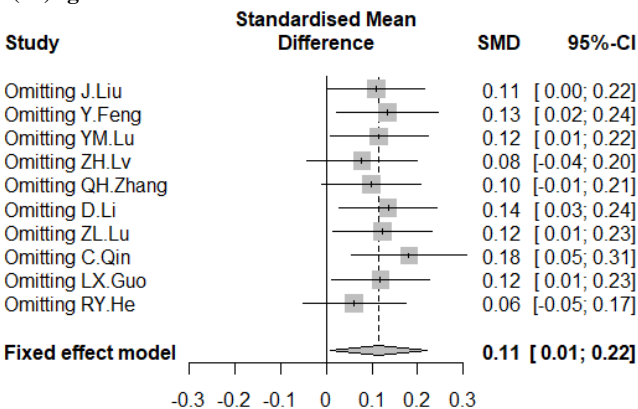

## (21) NK cell(ab)

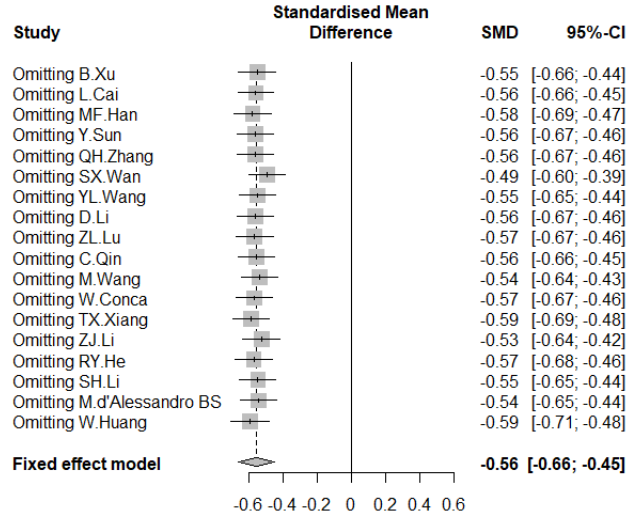

## (22) C3

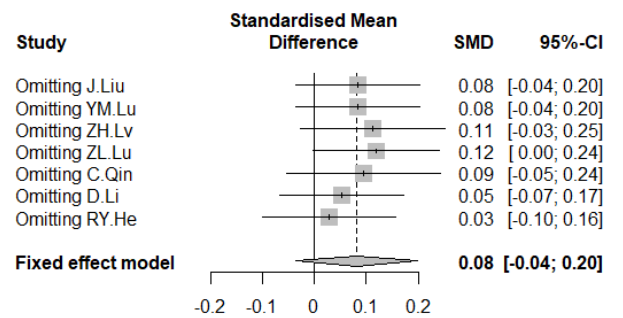

## (23) C4

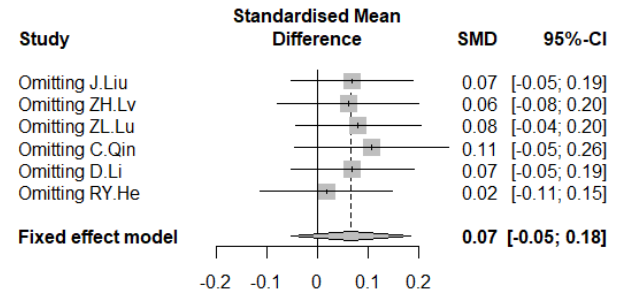

## (24) IgA

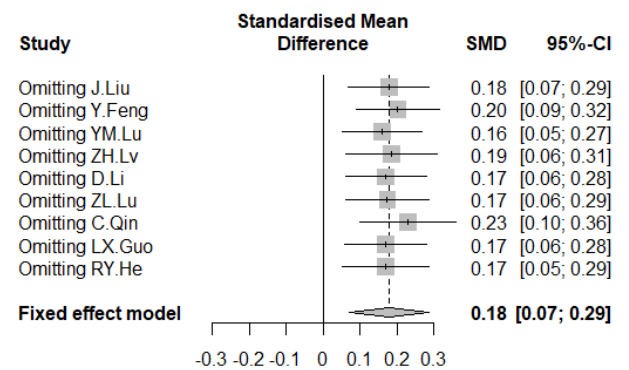

## (25) IgM

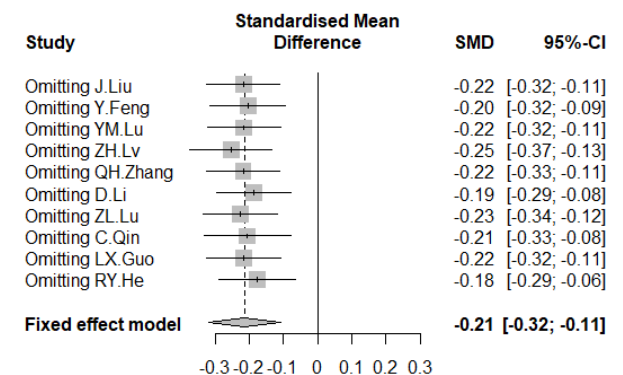

## (26) IgE

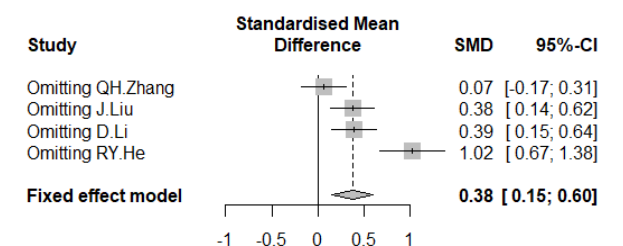

**Figure E9 (B) Sensitivity analysis of immunological parameters non-survivors and survivors of COVID-19**

**(1) CD3+T(ab)**

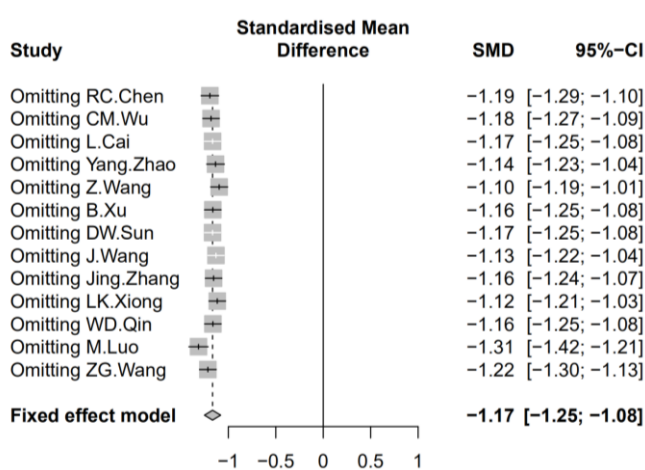

**(2) CD3+T(%)**

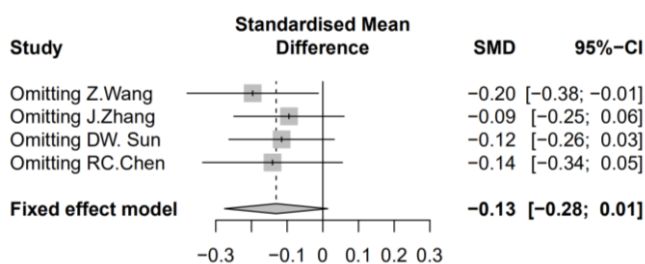

**(3) CD4+T(ab)**

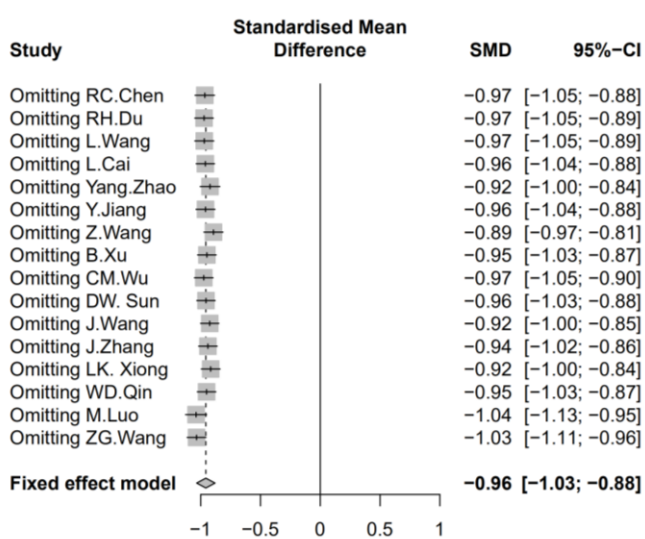

**(4) CD4+T(%)**

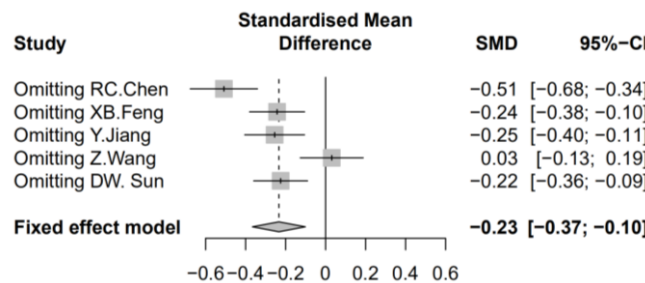

**(5) CD8+T(ab)**

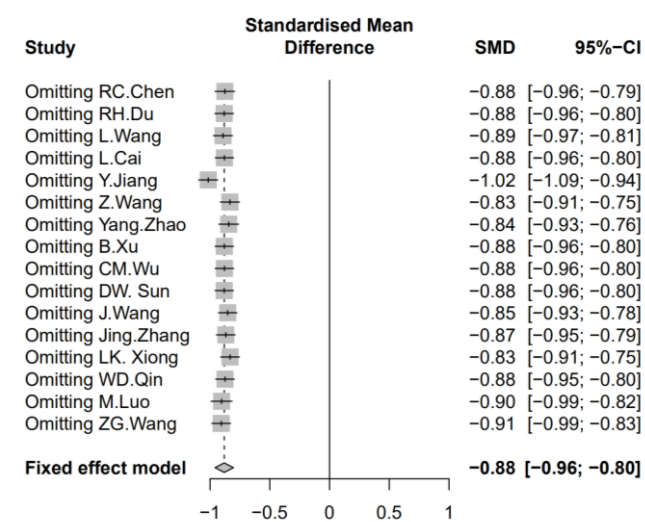

**(6) CD8+T(%)**

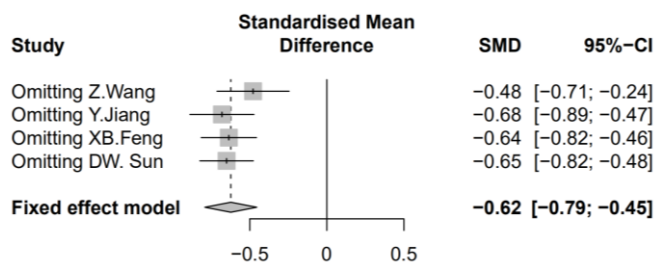

**(7) CD4+T/CD8+T ratio**

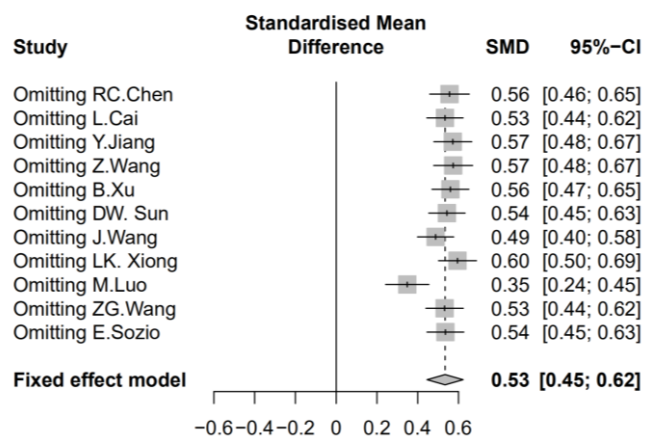

**(8) B cell(ab)**

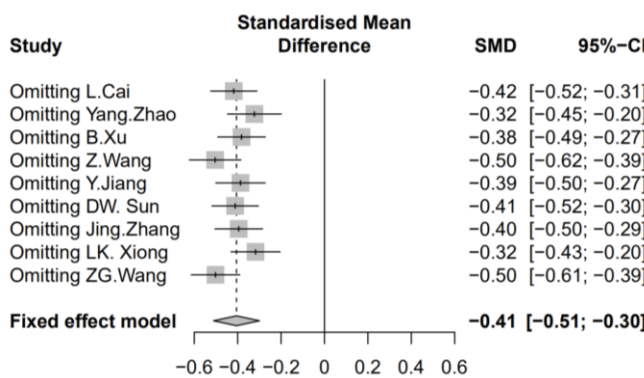

**(9) NK cell(ab)**

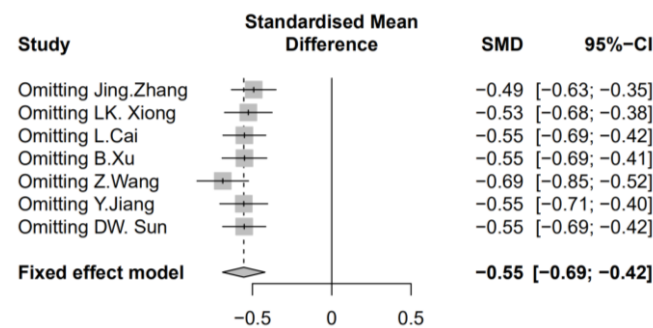

**(10) IL-1β**

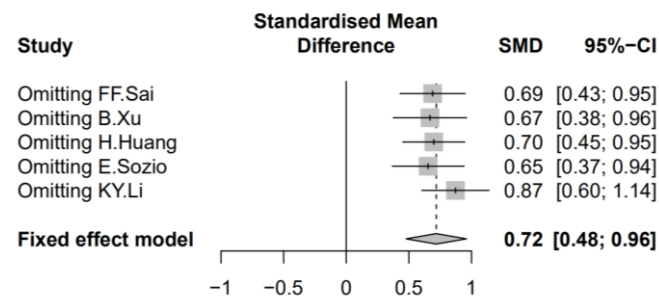

**(11) IL-2**

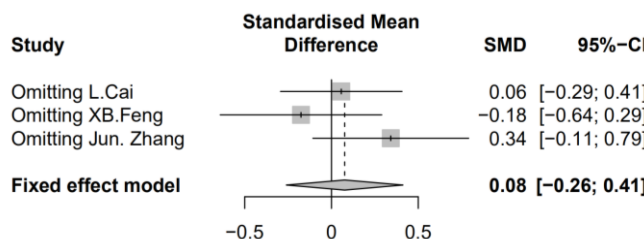

(12) IL-2R

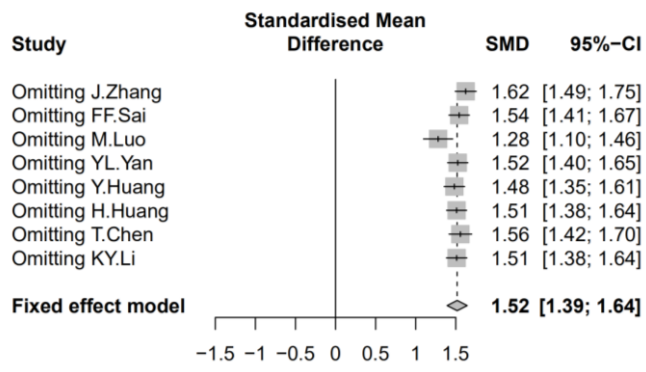

(18) IL-8

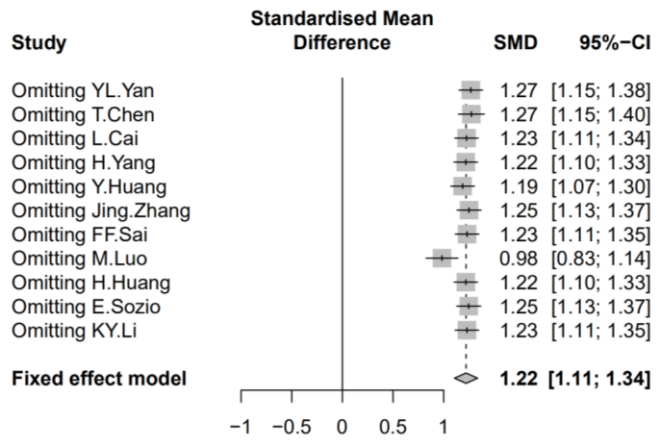

(13) IL-4

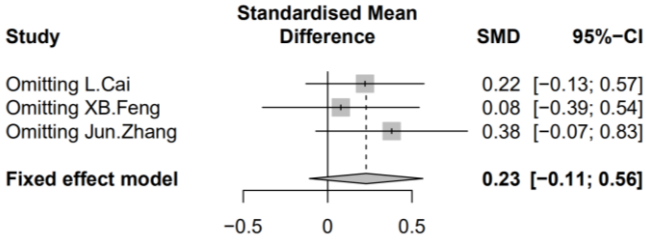

(19) IL-10

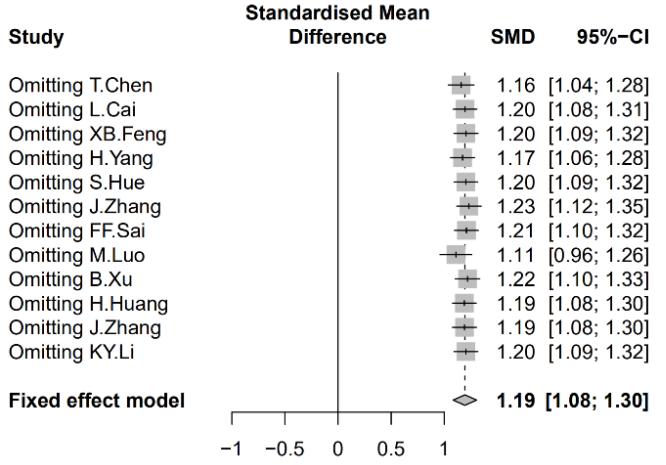

(14) IL-6

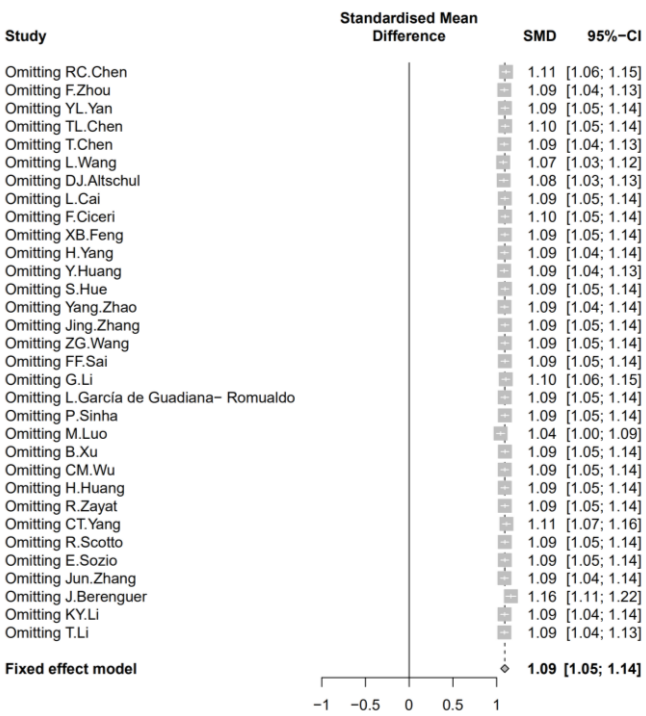

(20) TNF-α

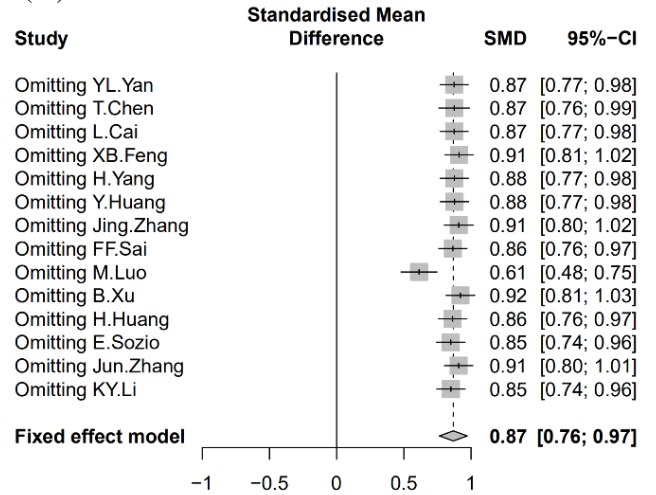

(15) IFN-γ

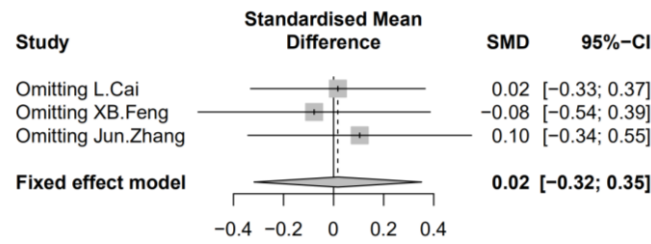

(21) IgA

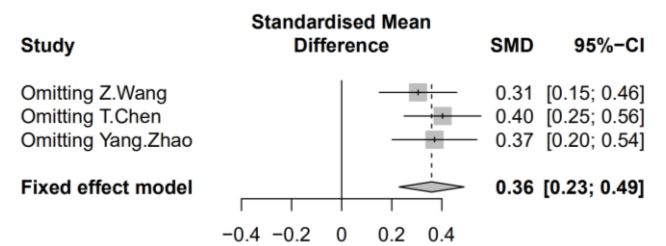

(16) IgM

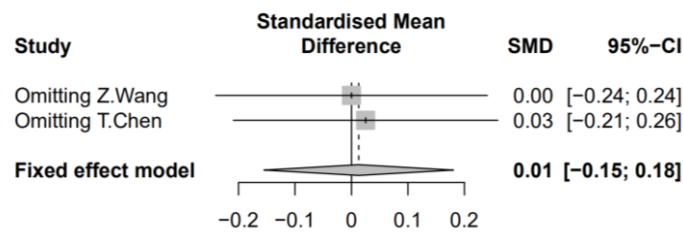

(22) IgG

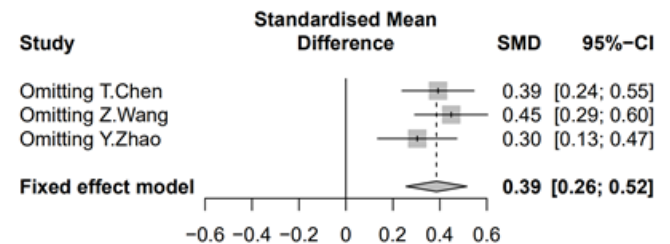

(17) C3

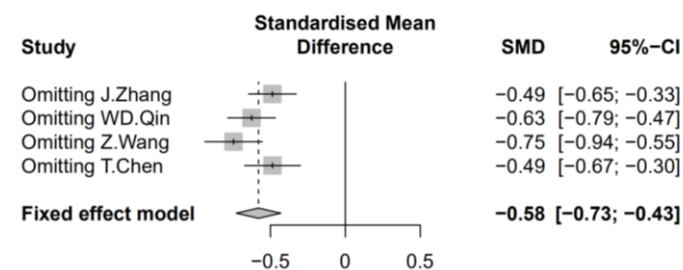

(23) C4

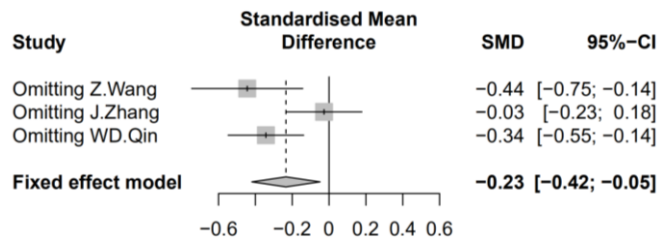

Supplement: 12016_2021_8908_MOESM9_ESM.pdf [file 12016_2021_8908_MOESM9_ESM.pdf]
