# Supplementary material
Source: PubMed Central journal article supplement (PMC8763427)

**Figure E10 (A) Sensitivity analysis of hematological parameters in severe and non-severe patients of COVID-19**

**(1) WBC**

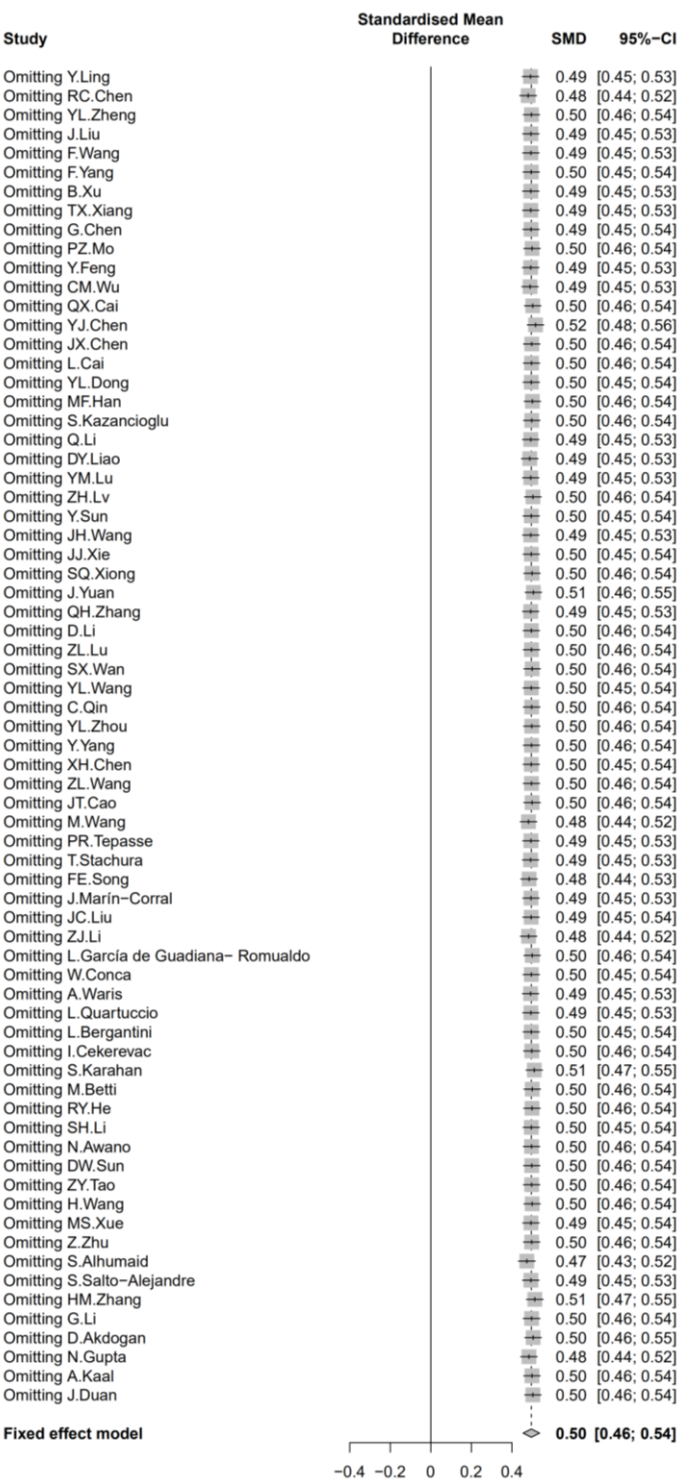

**(2) Mono**

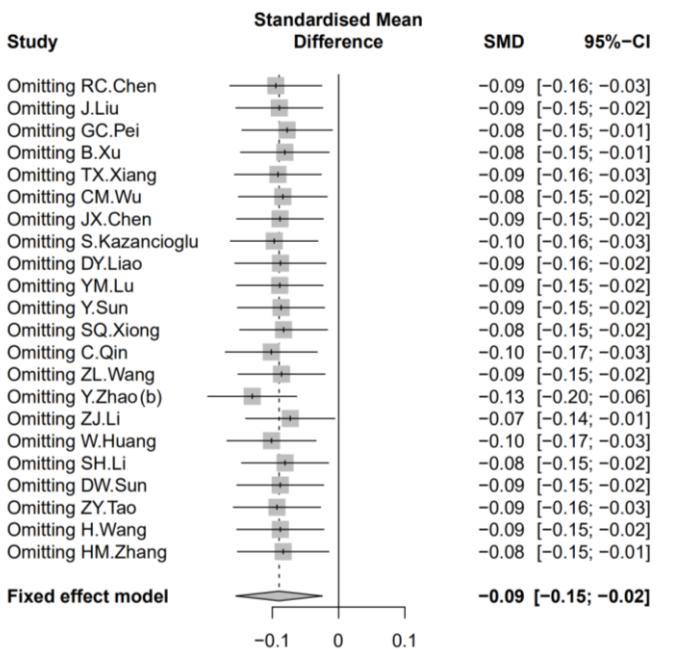

**(3) Neu**

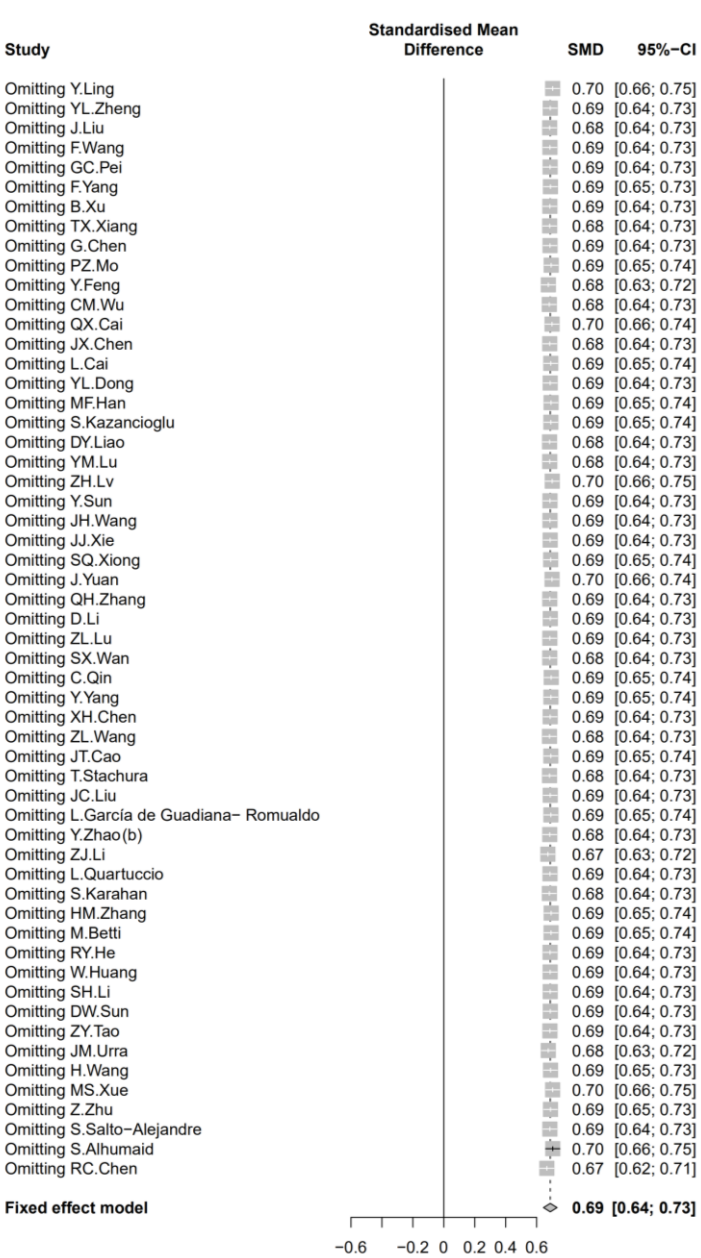

**(4) Eos**

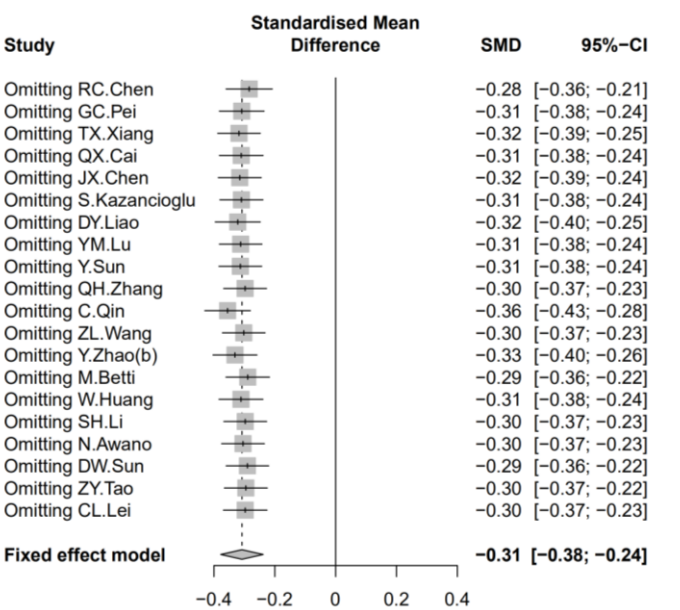

Figure E10 (A) Continued

(5) Lym

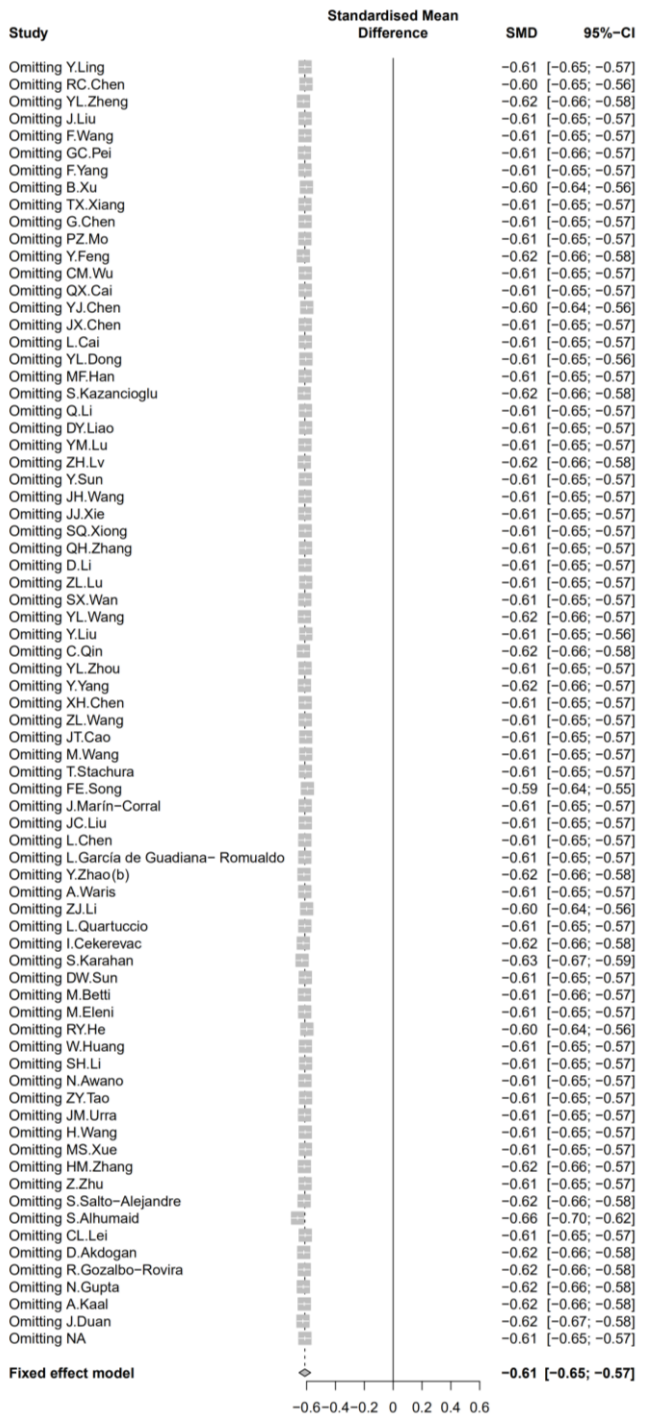

(6) Bas

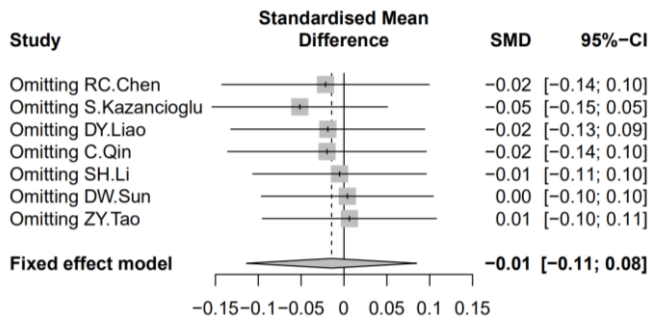

(7) PLR

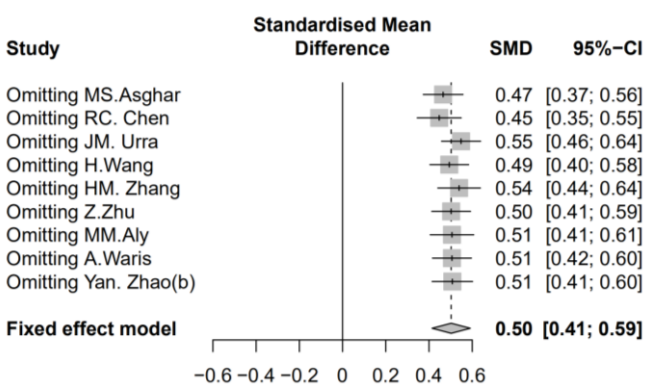

(8) PLT

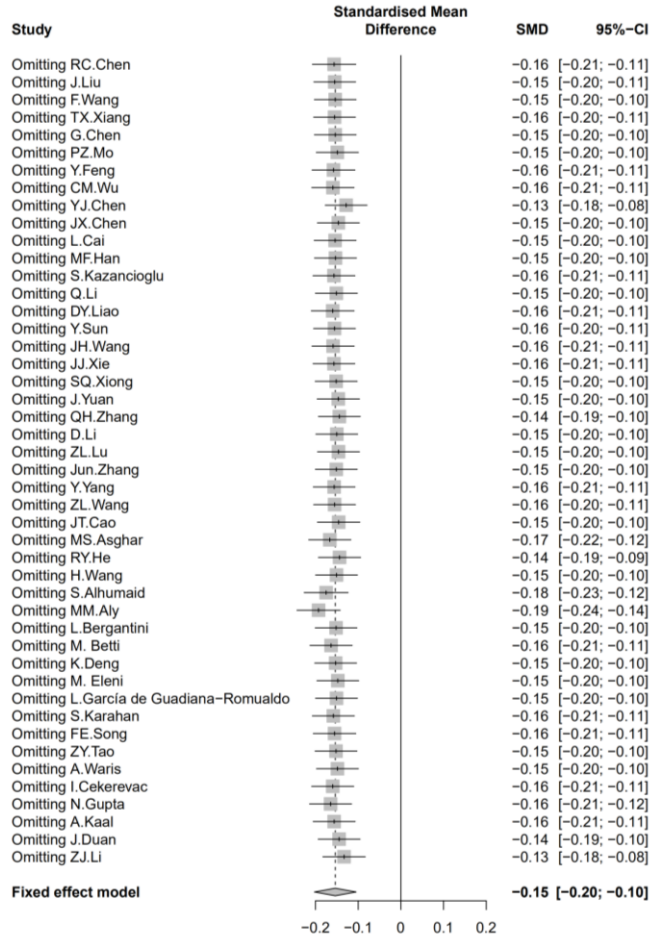

(9) HB

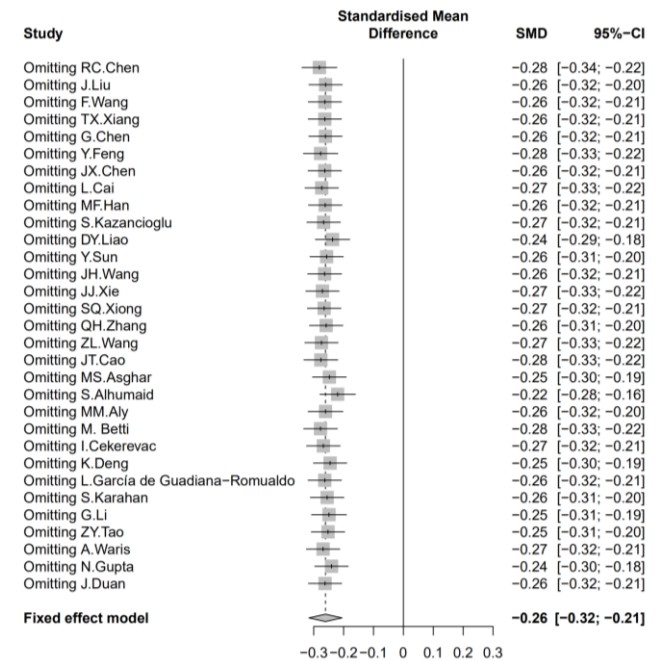

(10) NLR

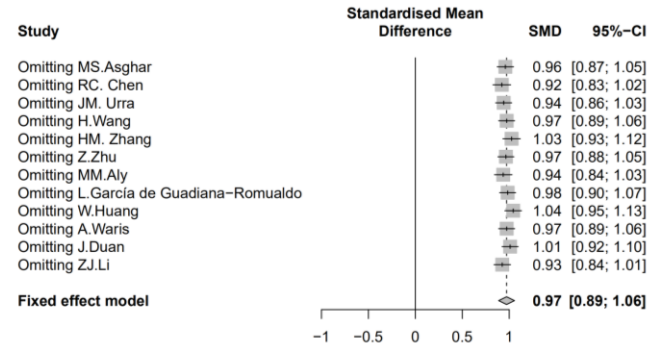

(11) LMR

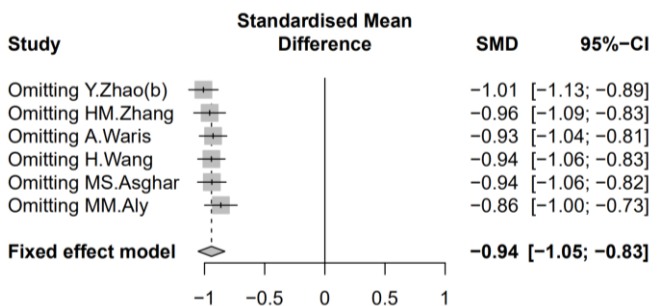

**Figure E10 (B) Sensitivity analysis of hematological parameters non-survivors and survivors of COVID-19**

**(1) WBC**

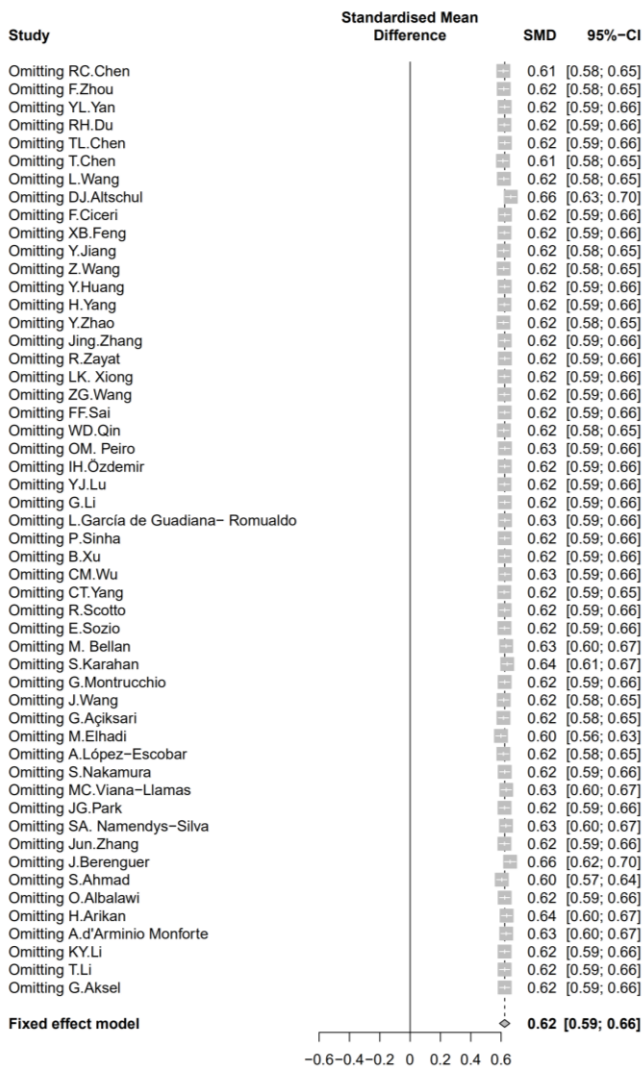

**(4) Lym**

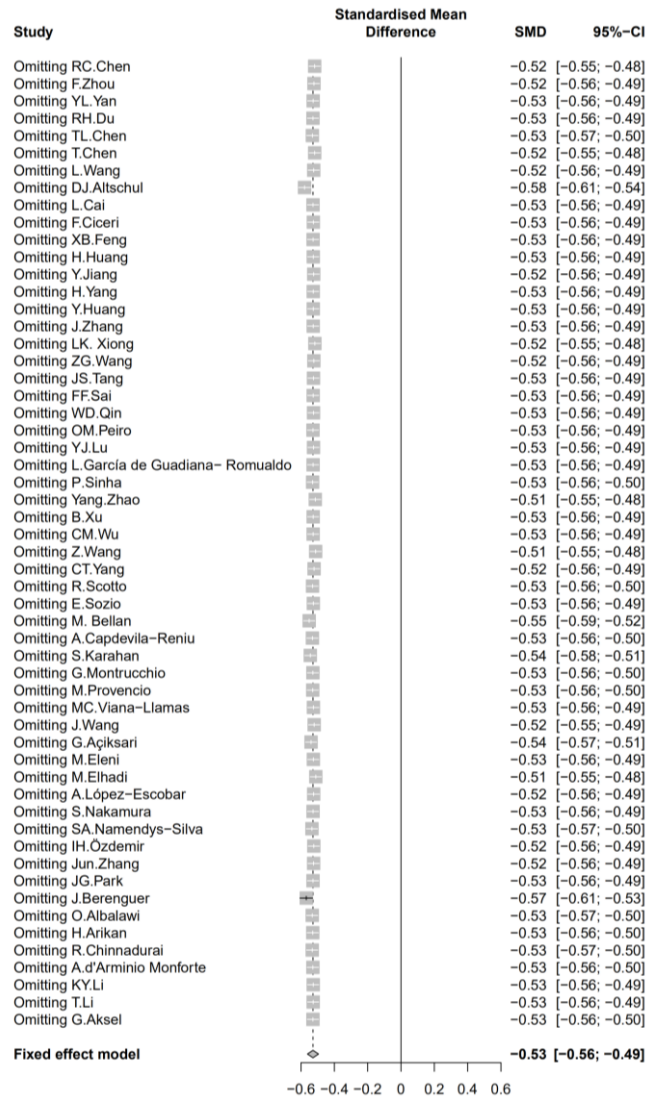

**(2) Neu**

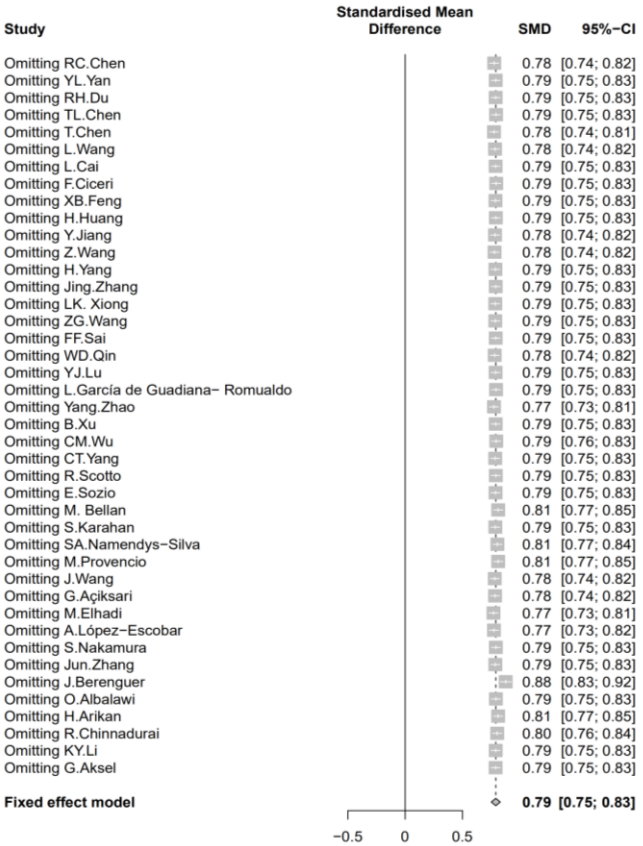

**(5) Mono**

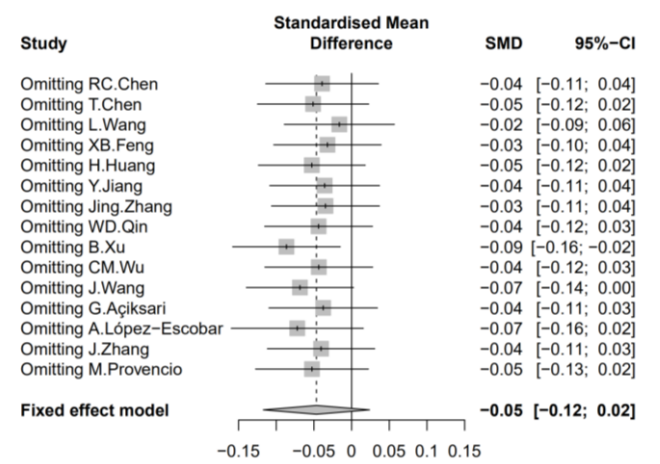

**(6) Bas**

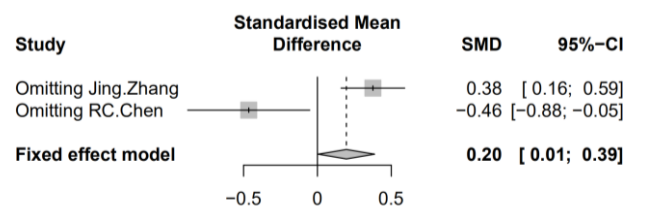

**(7) LMR**

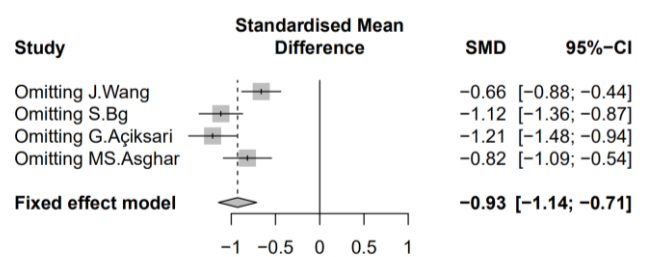

**(3) Eos**

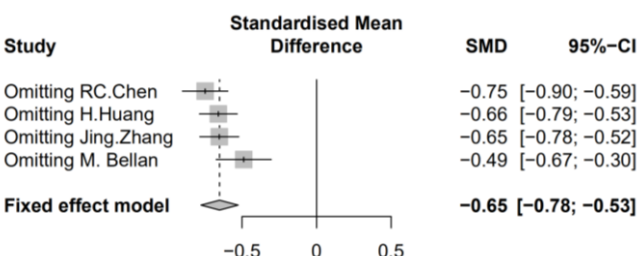

# Figure E10 (B) Continued

## (8) NLR

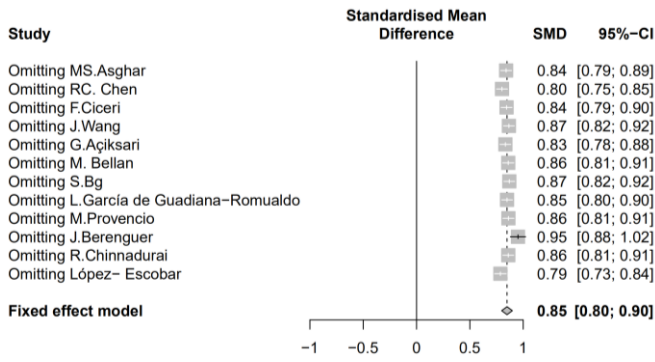

## (9) PLR

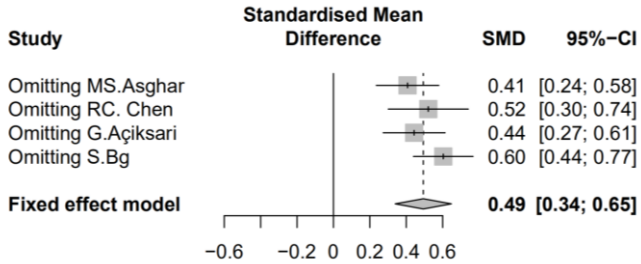

## (10) PLT

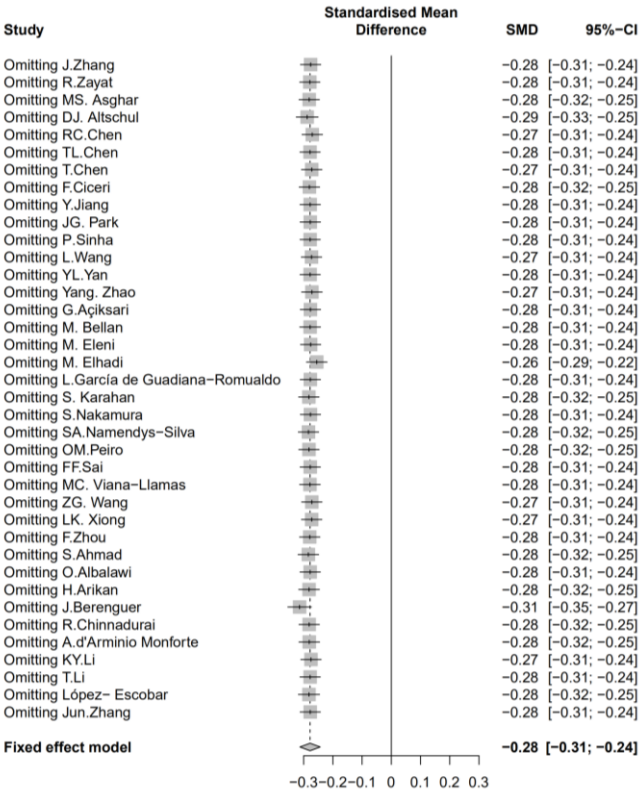

## (11) HB

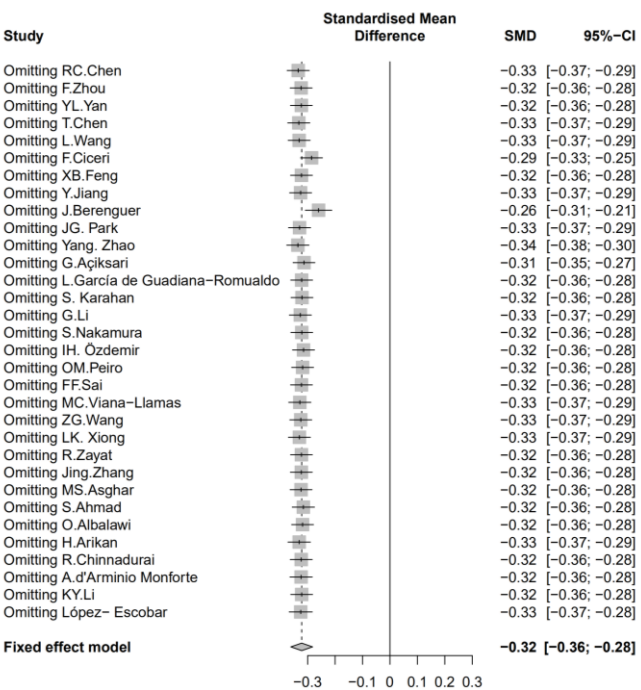

Supplement: 12016_2021_8908_MOESM10_ESM.pdf [file 12016_2021_8908_MOESM10_ESM.pdf]
