# Supplementary material
Source: PubMed Central journal article supplement (PMC8763427)

**Figure E13 (A) Sensitivity analysis of biochemical parameters in severe and non-severe patients of COVID-19**

**(1) CK**

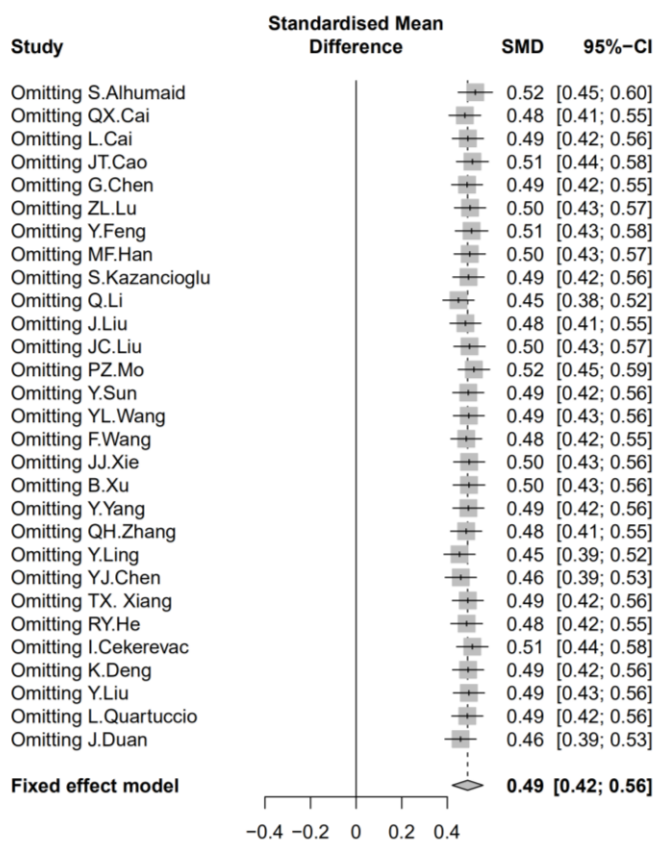

**(2) AST**

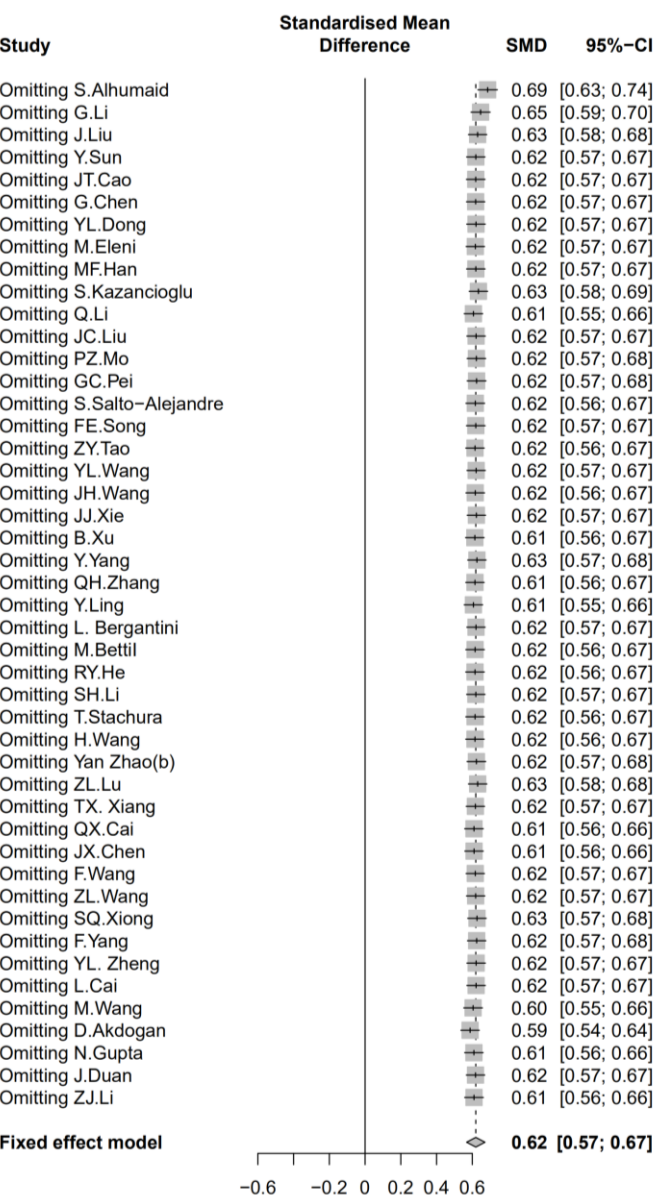

**(3) LDH**

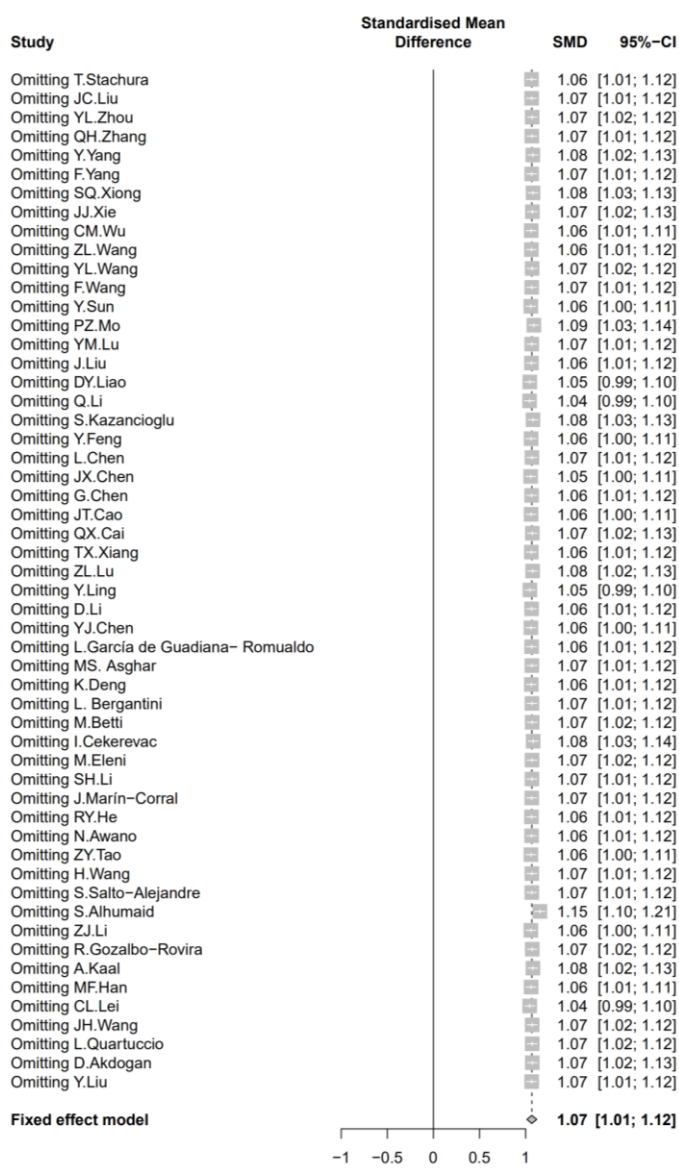

**(4) ALT**

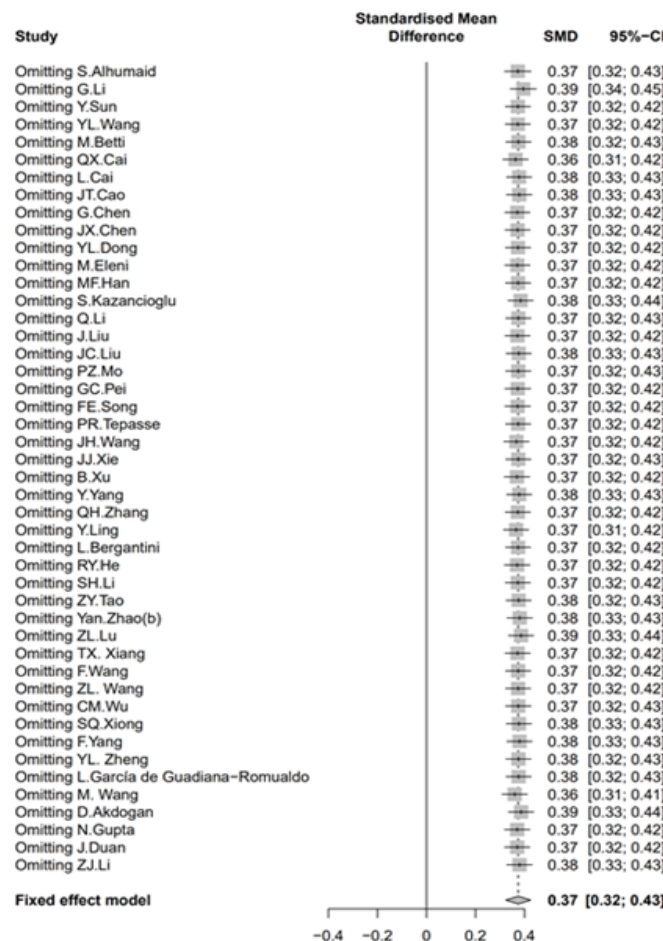

Figure E13 (A) (Continued)

(5) TBIL

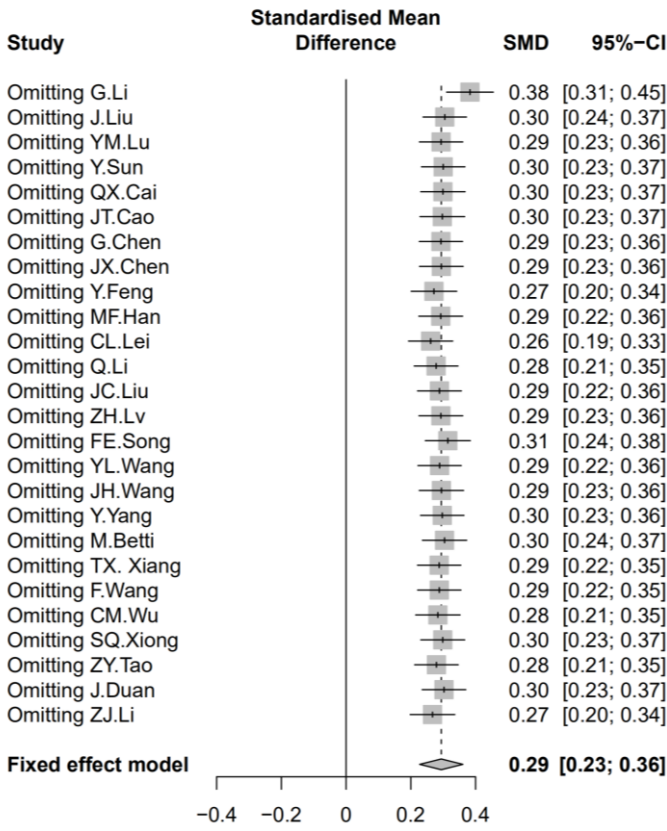

(6) CRN

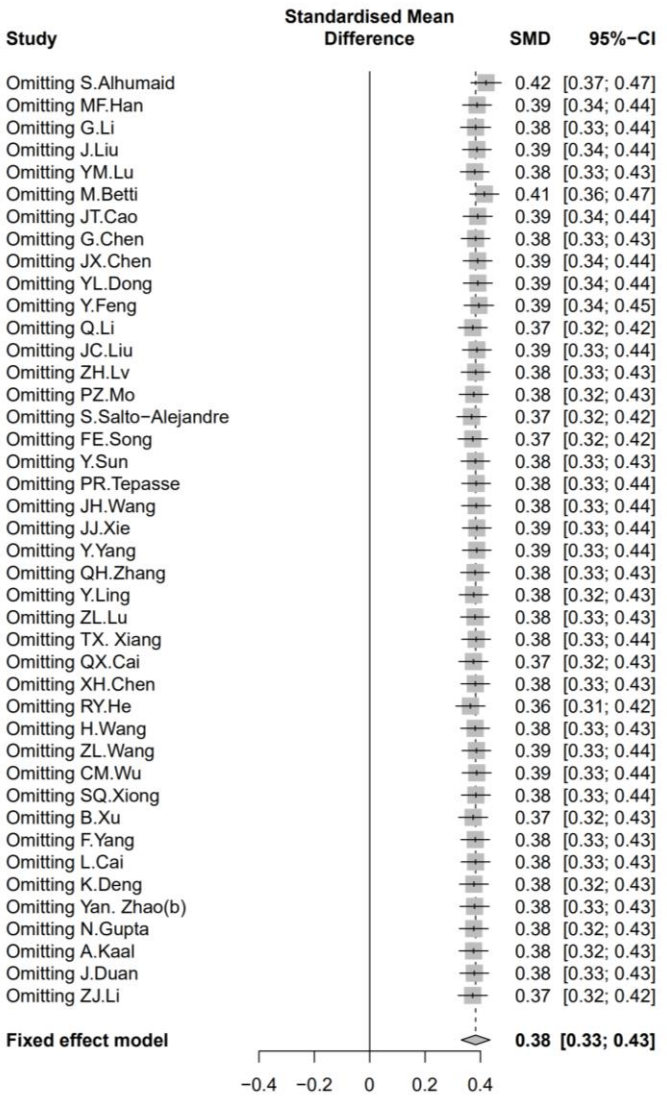

(7) MYO

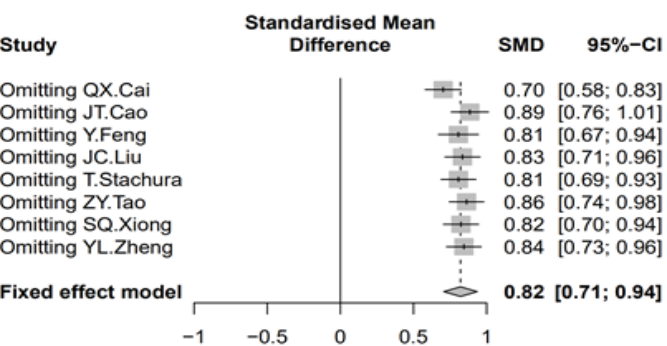

(8) BUN

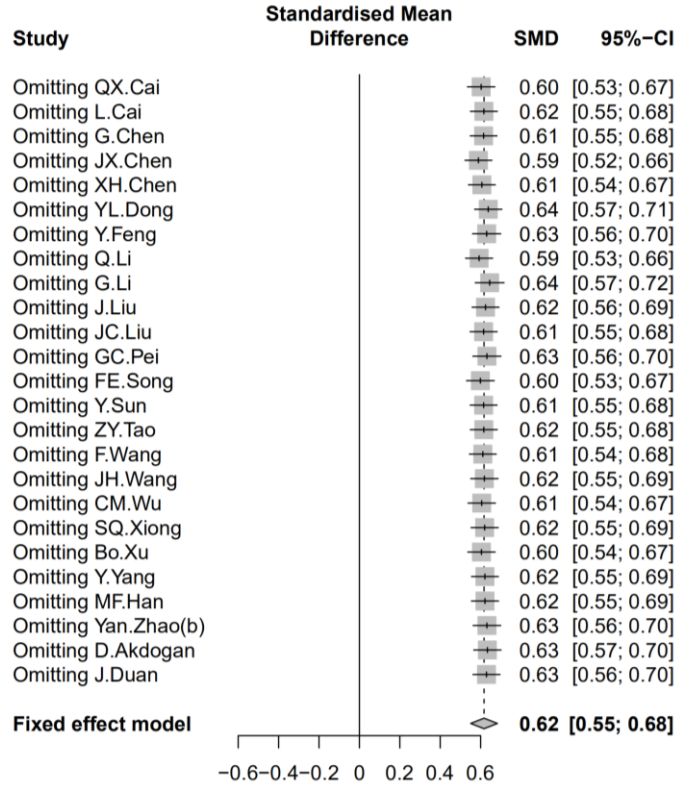

(9) ALB

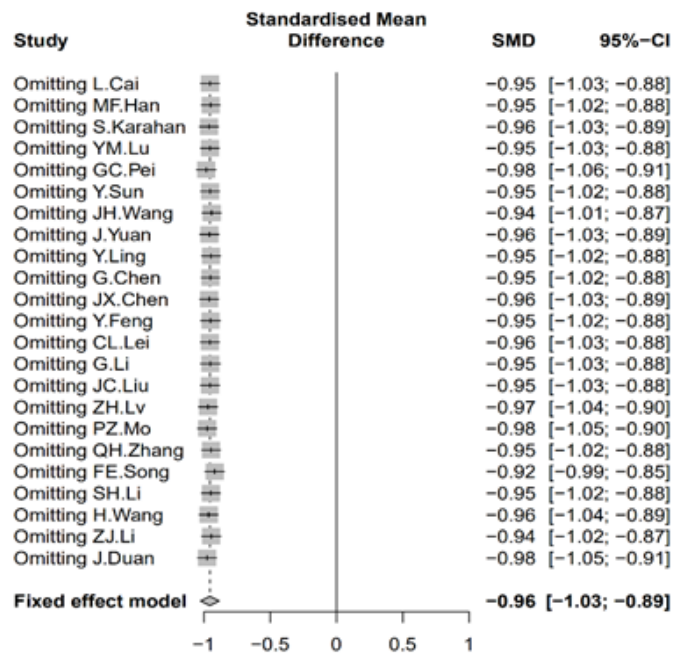

(10) cTnI

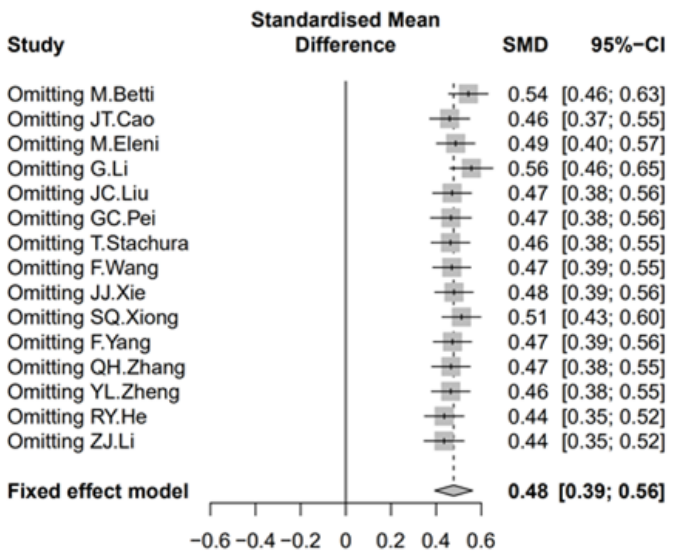

**Figure E13 (B) Sensitivity analysis of biochemical parameters in non-survivors and survivors of COVID-19**

**(1) CK**

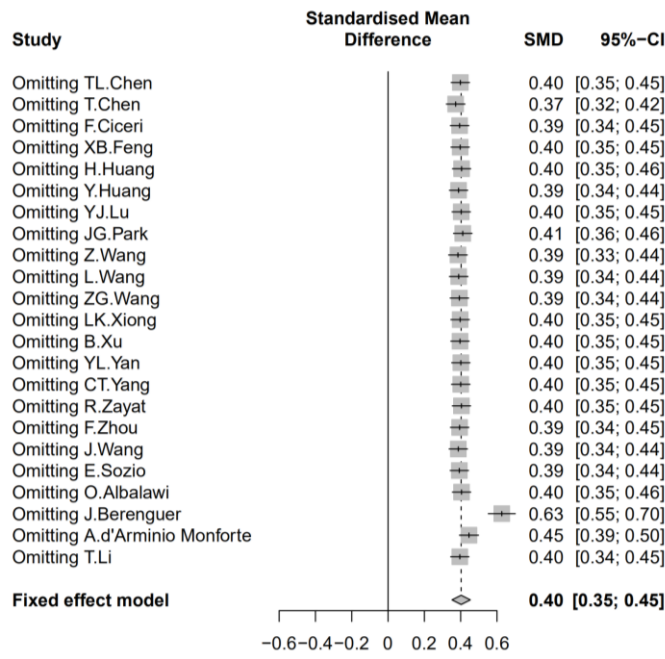

**(2) cTnI**

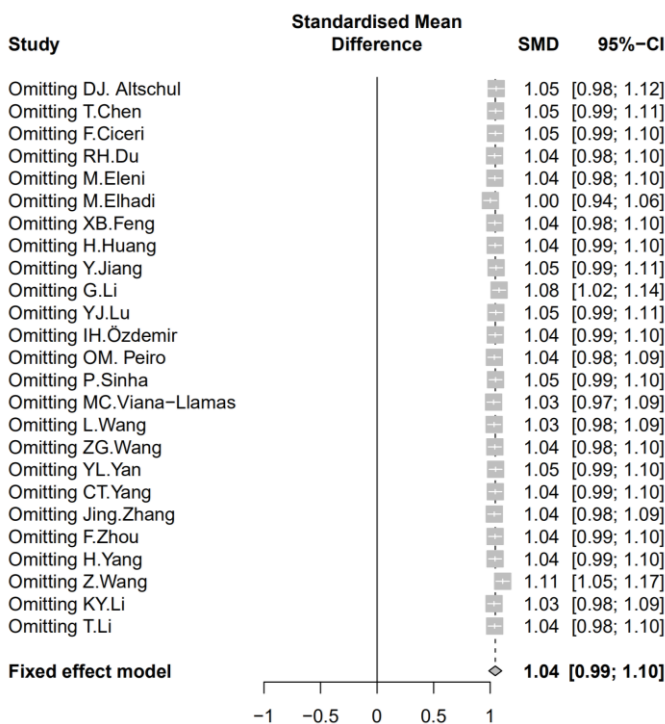

**(3) LDH**

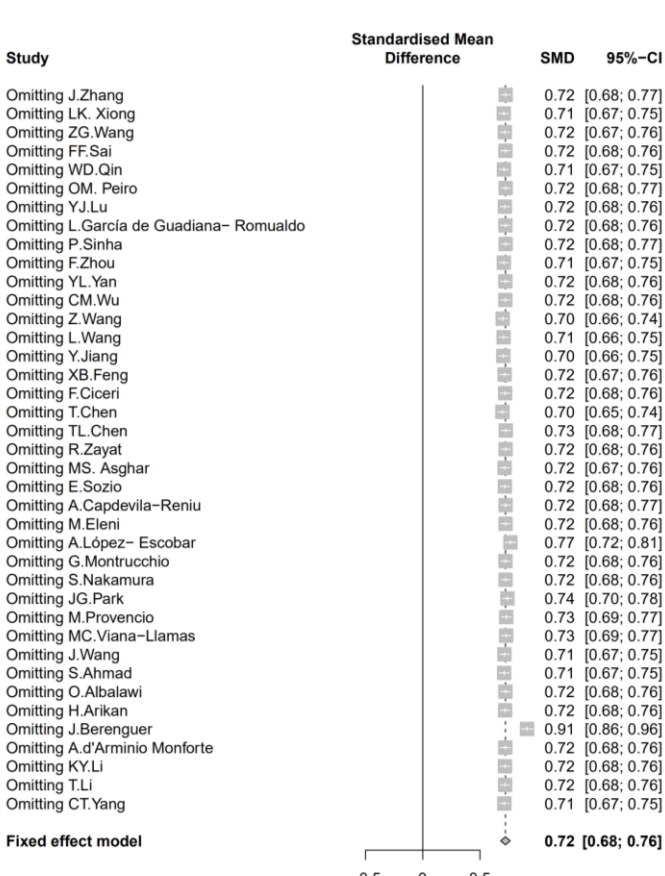

**(4) ALT**

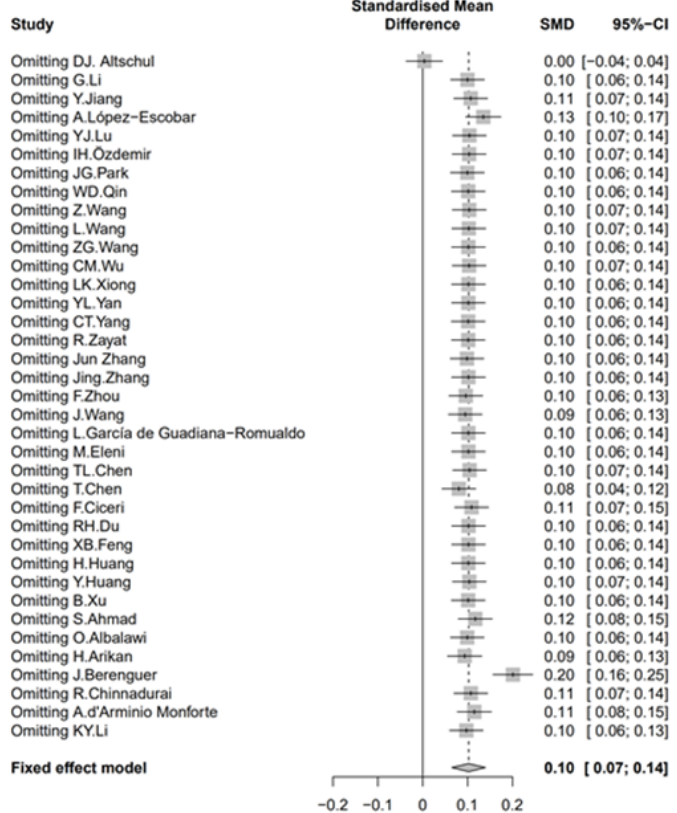

**(5) AST**

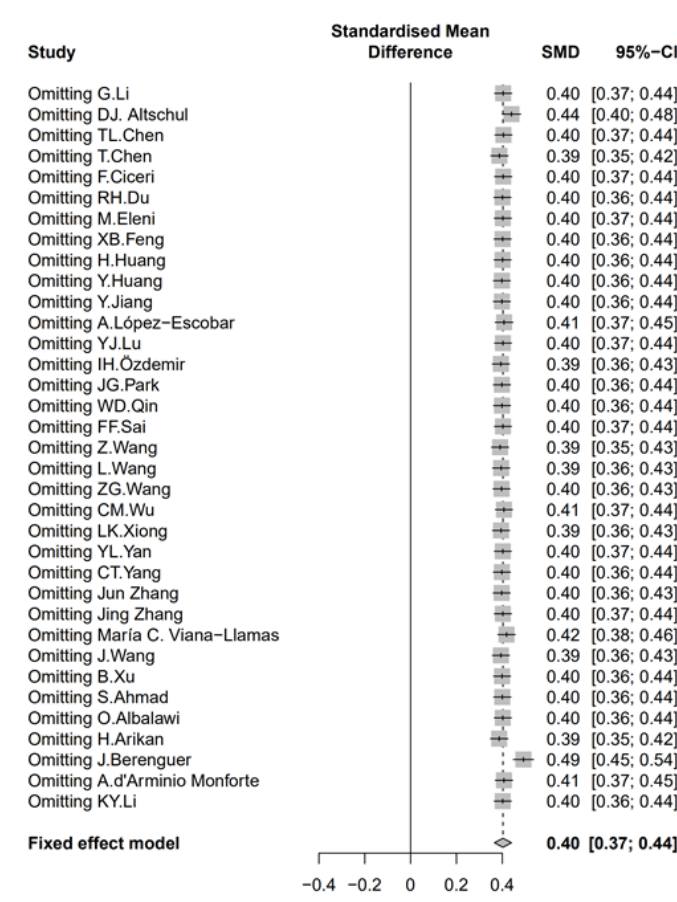

**(6) MYO**

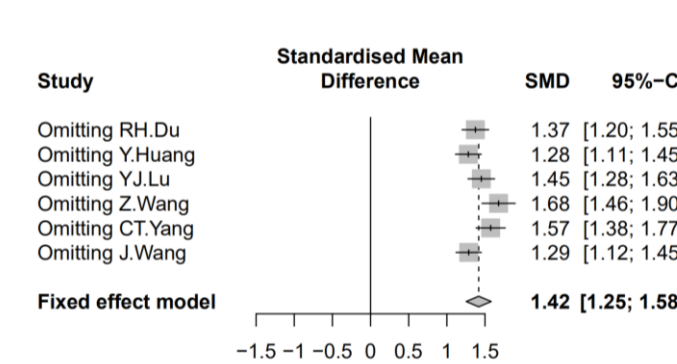

Figure E13 (B) (Continued)

(7) TBIL

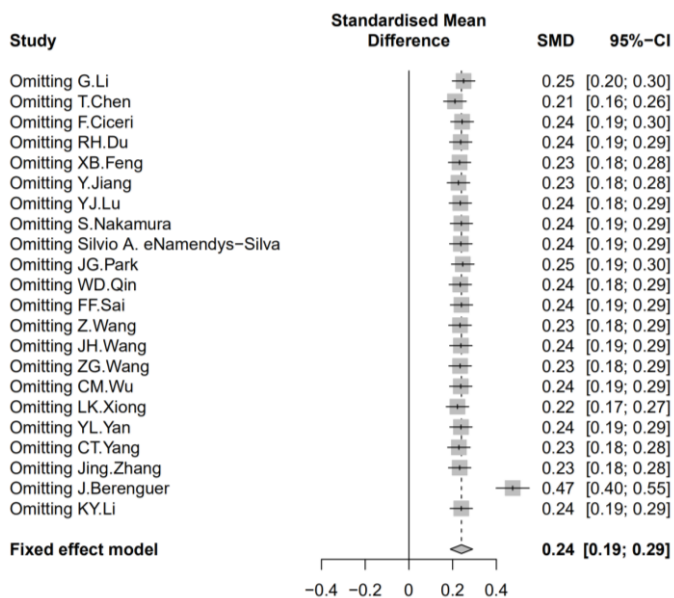

(10) BUN

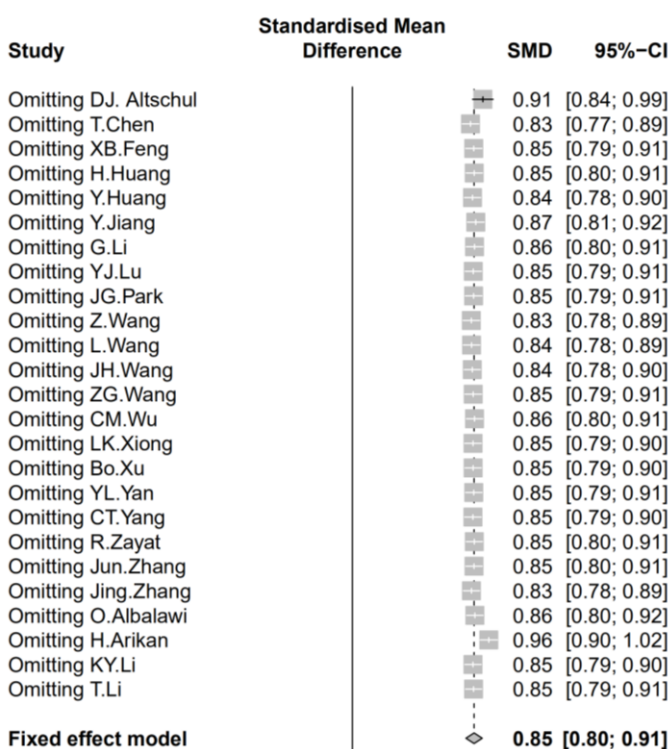

(8) ALB

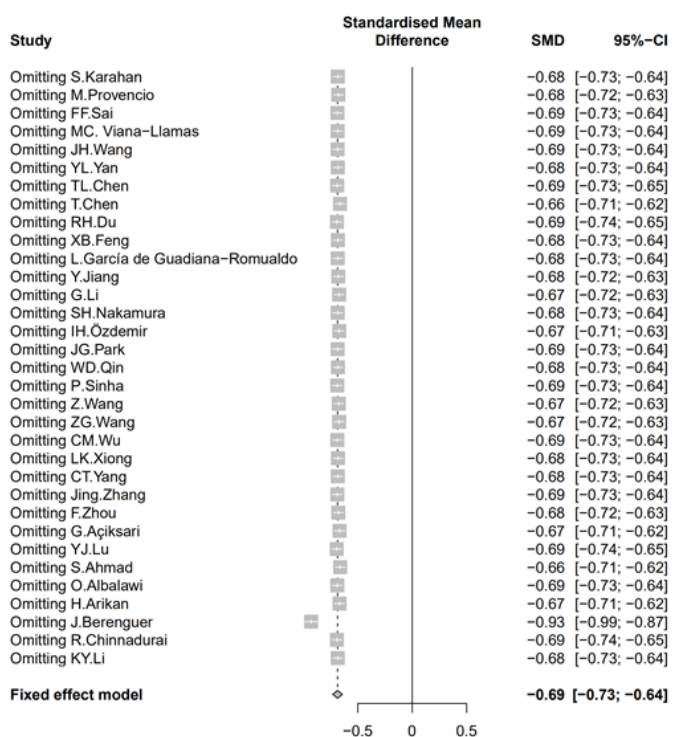

(9) CRN

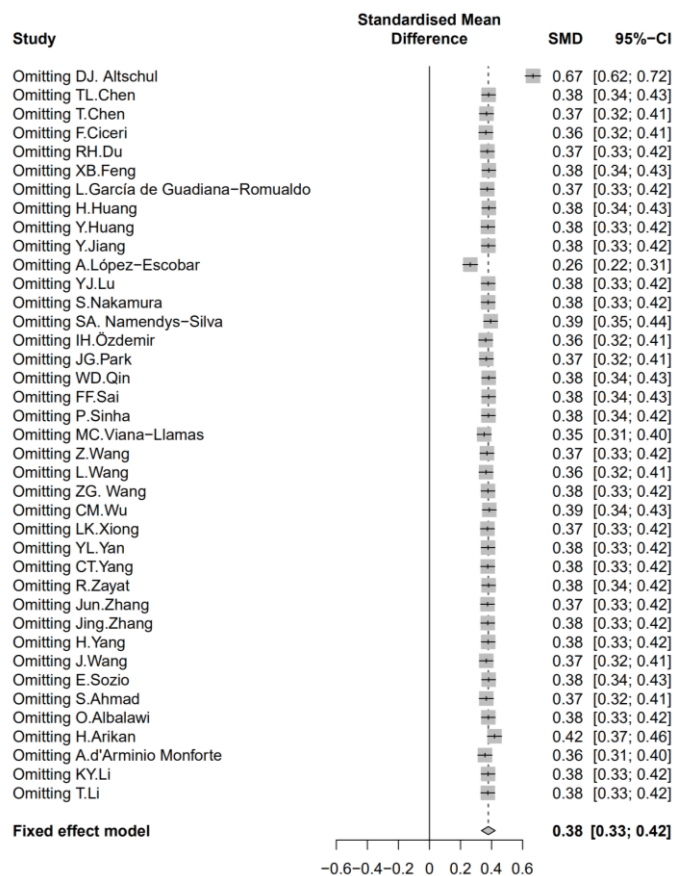

Supplement: 12016_2021_8908_MOESM13_ESM.pdf [file 12016_2021_8908_MOESM13_ESM.pdf]
