# Supplementary material
Source: PubMed Central journal article supplement (PMC8763427)

**Figure E4 (A) Forest plots of coagulation parameters in severe and non-severe patients of COVID-19**

**(1) PT**

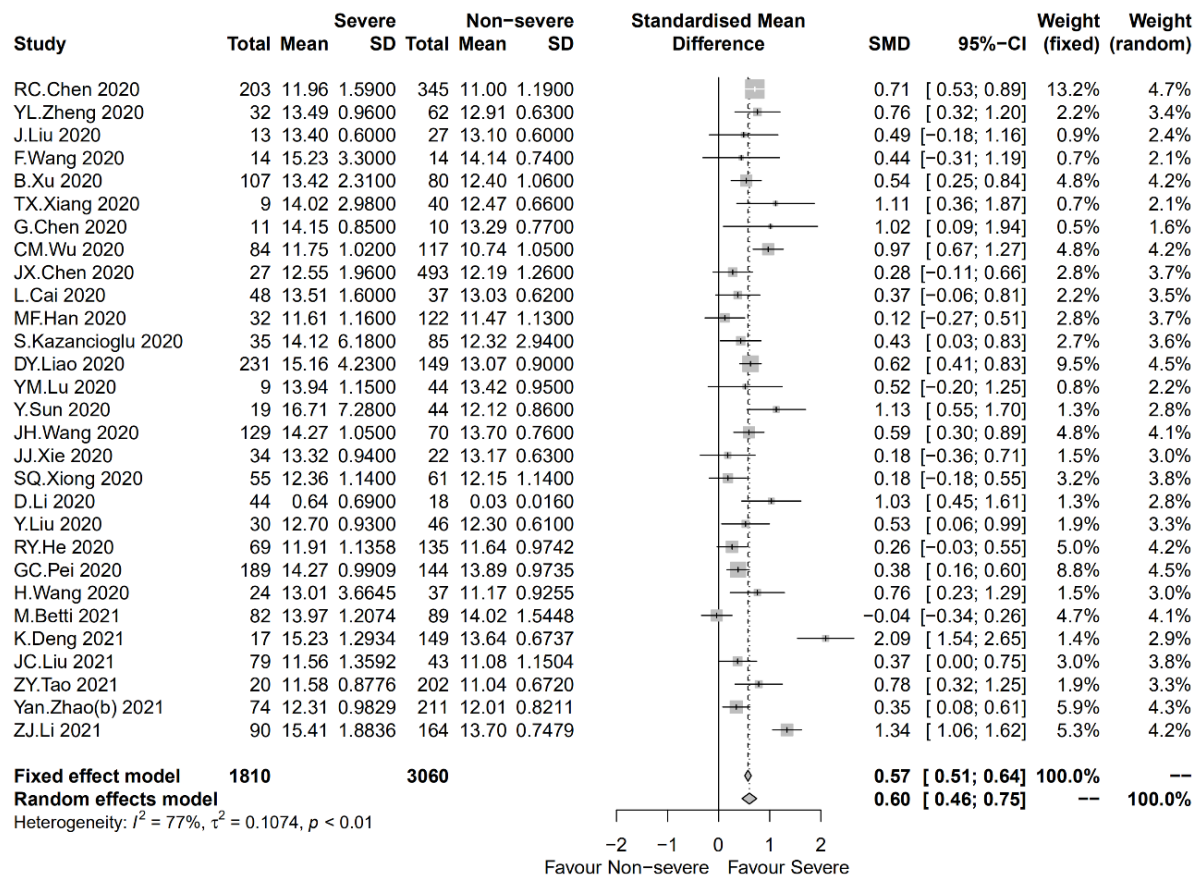

**(2) APTT**

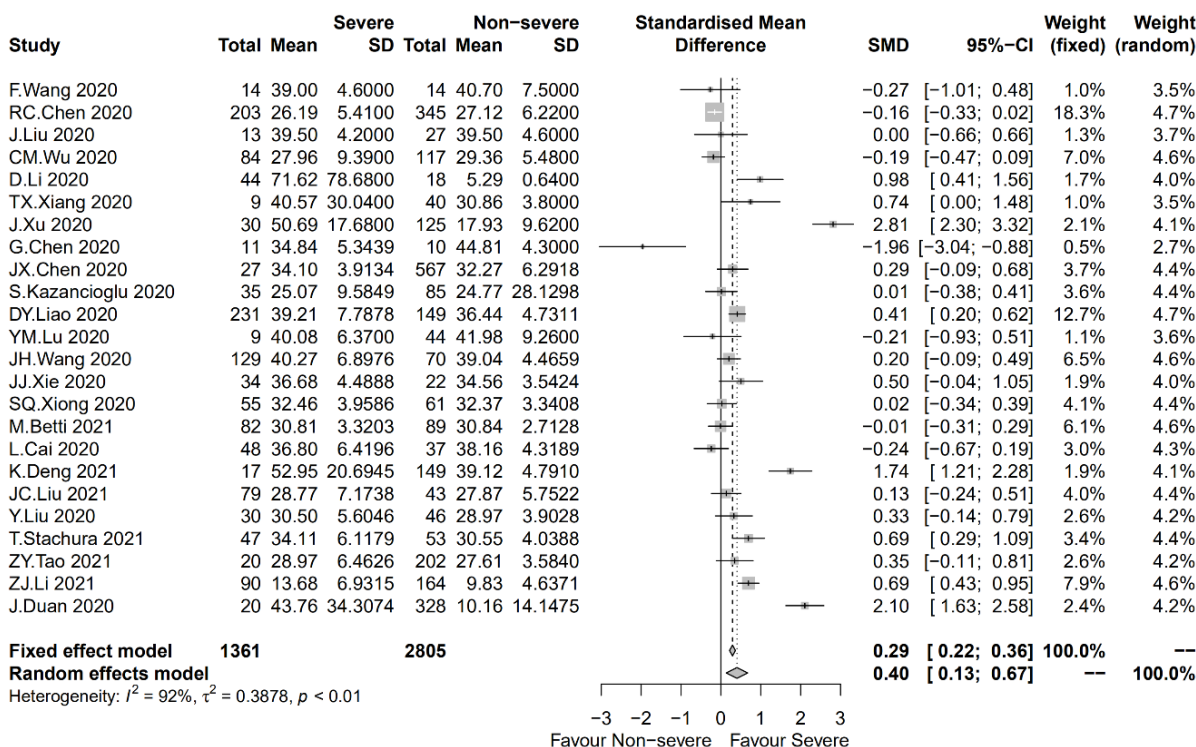

**(3) FIB**

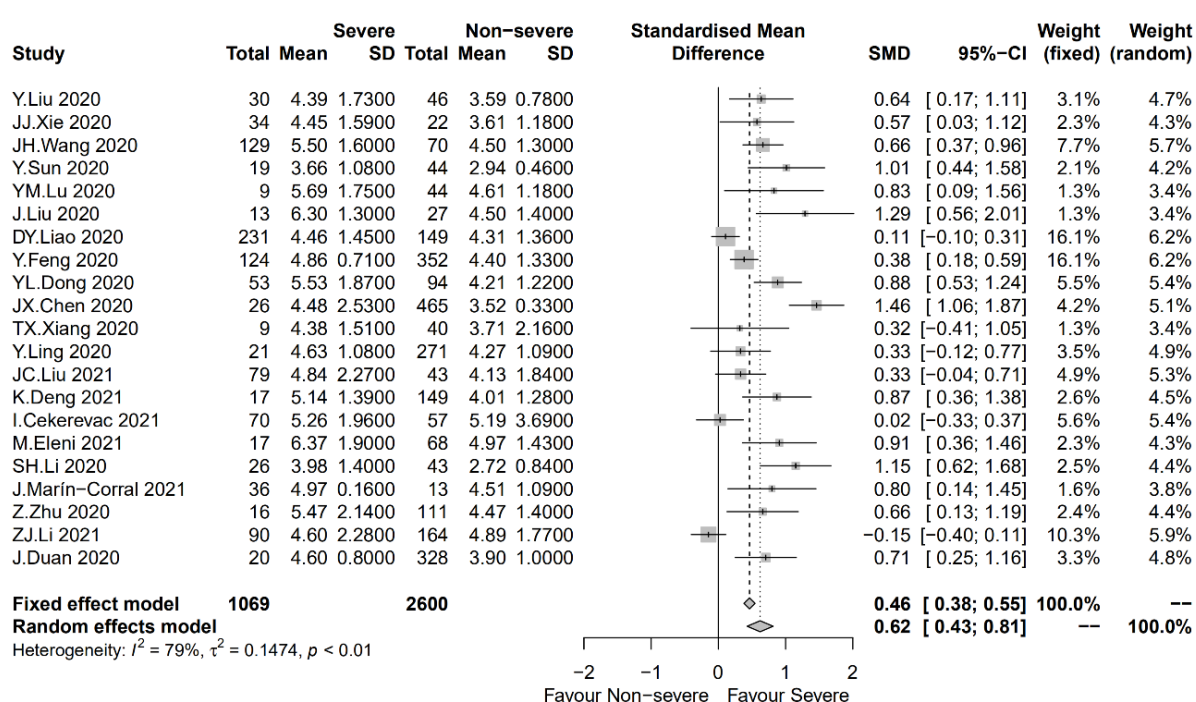

Figure E4 (A) (Continued)

(4) D-dimer

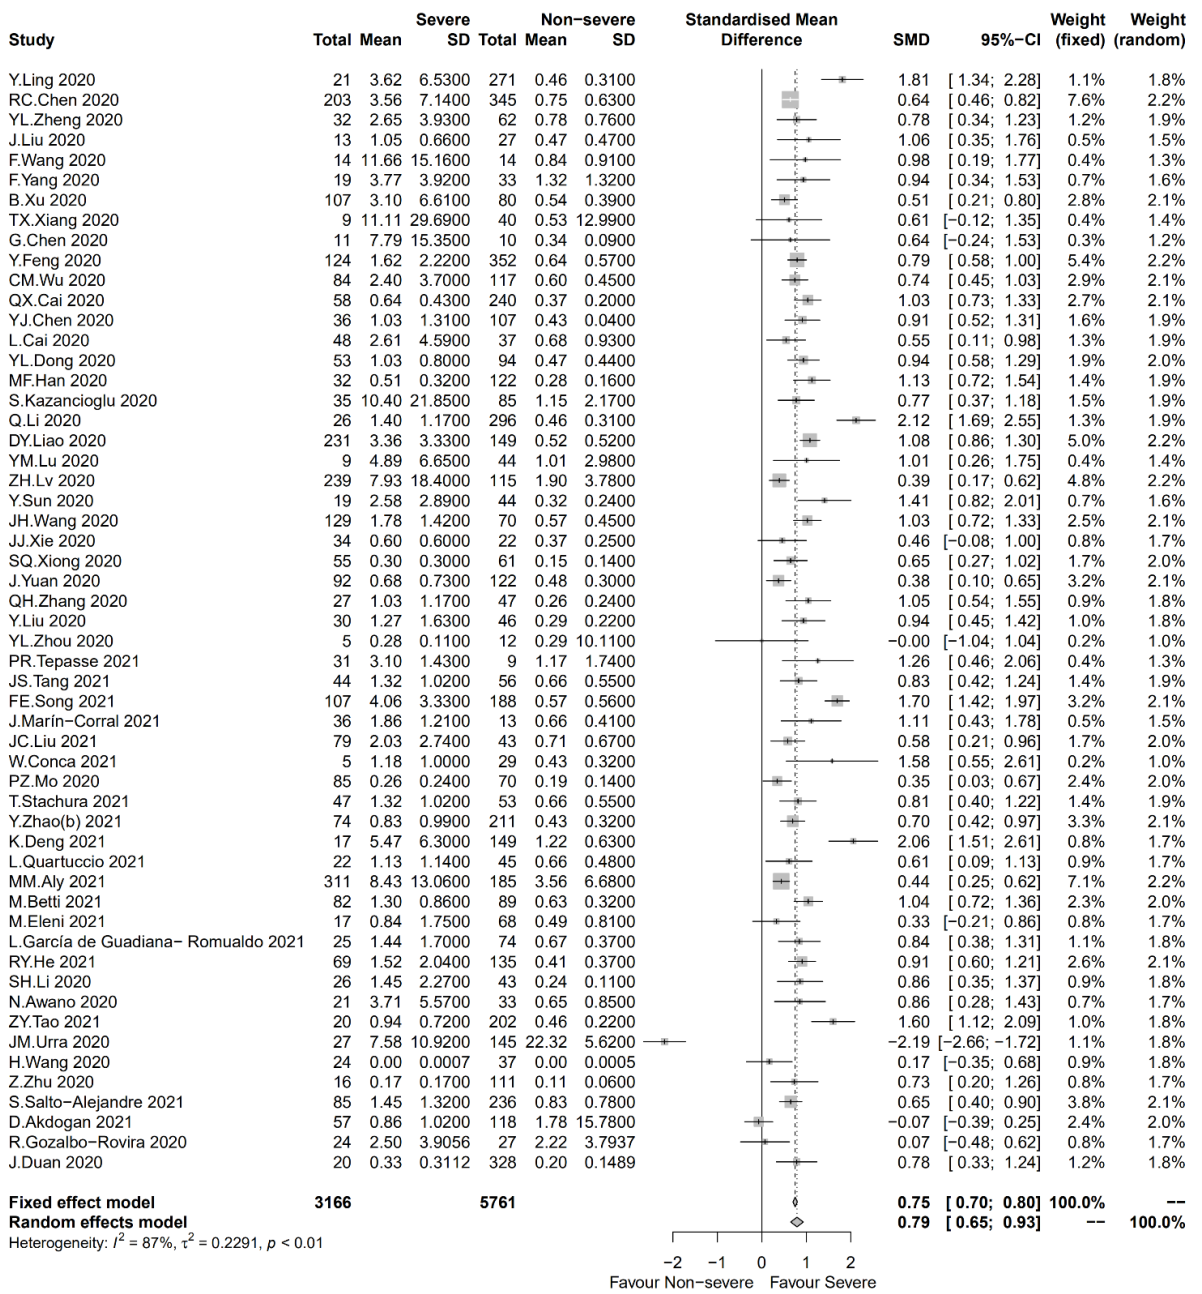

Figure E4 (B) Forest plots of coagulation parameters in non-survivors and survivors of COVID-19

(1) PT

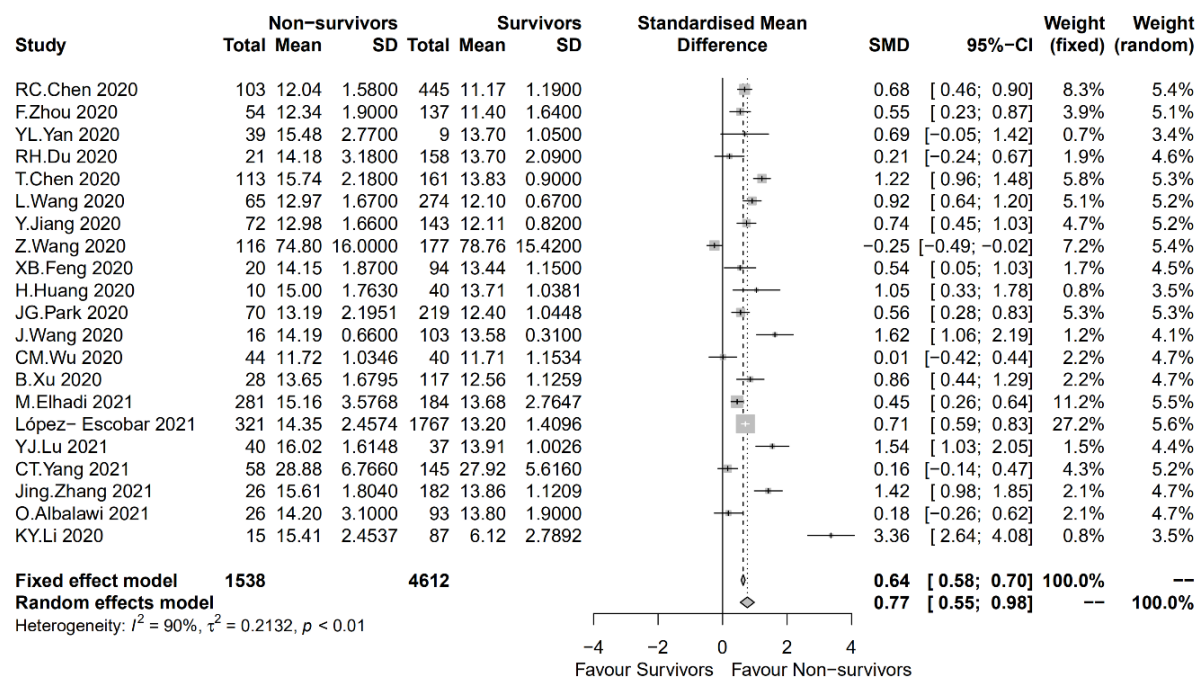

(2) APTT

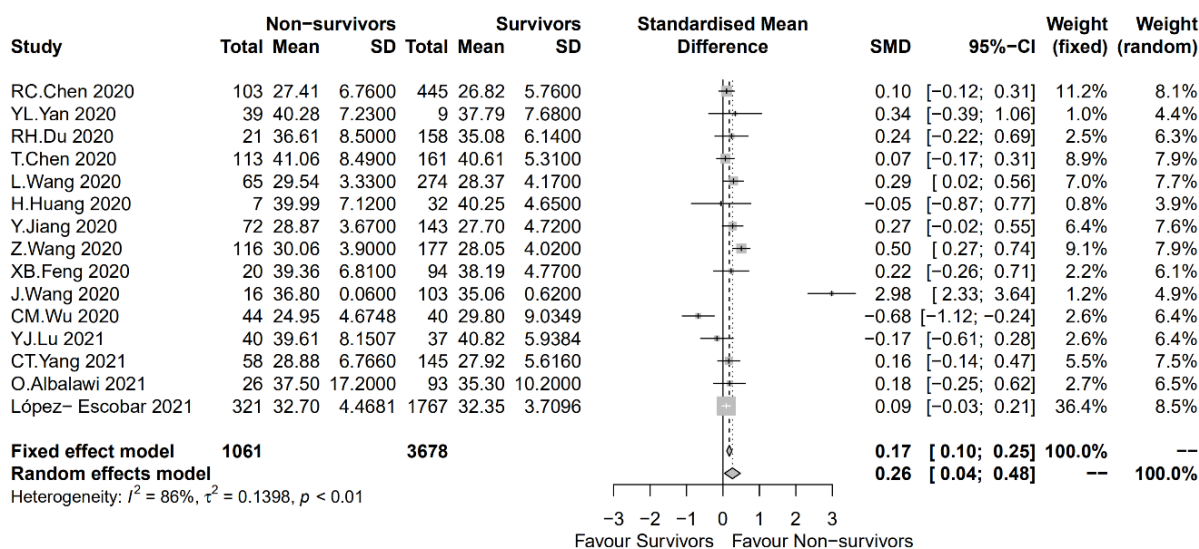

(3) FIB

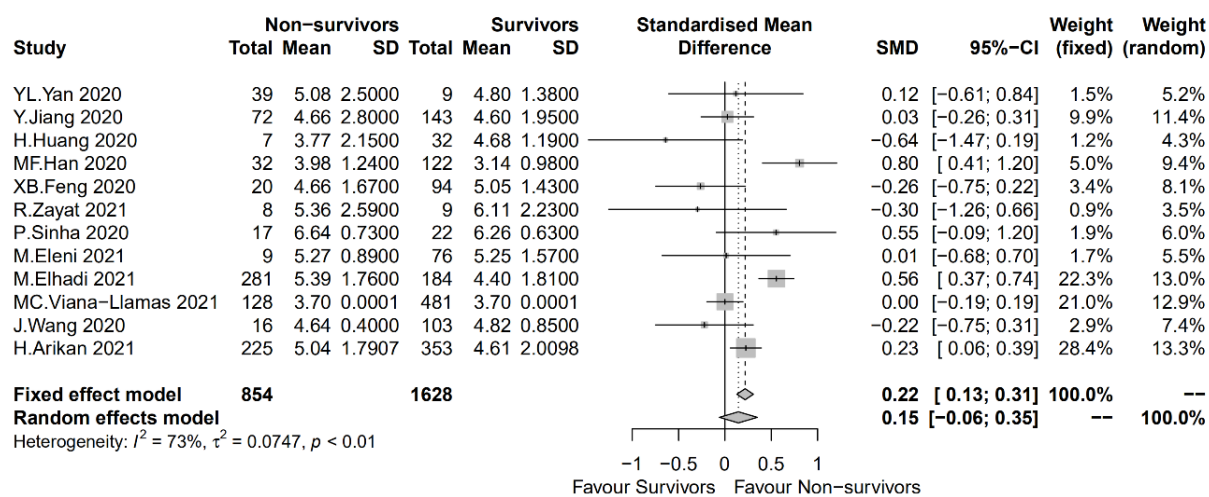

Figure E4 (B) (Continued)

(4) D-dimer

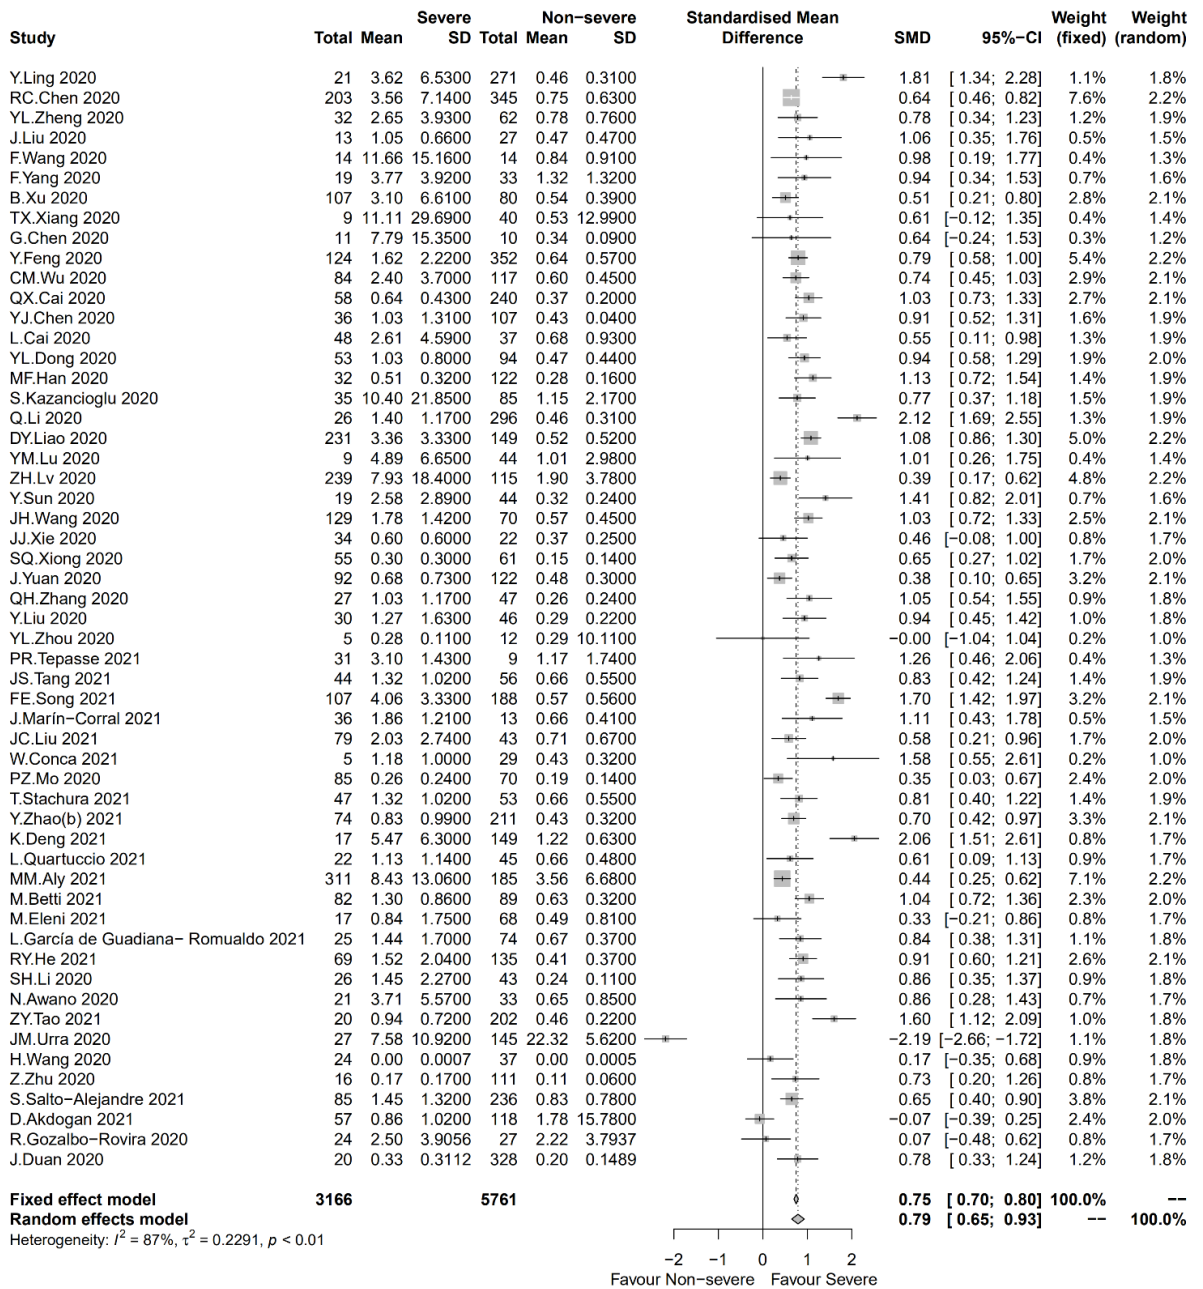

Supplement: 12016_2021_8908_MOESM4_ESM.pdf [file 12016_2021_8908_MOESM4_ESM.pdf]
