# Supplementary material
Source: PubMed Central journal article supplement (PMC8763427)

**Figure E5 (A) Forest plots of inflammatory parameters in severe and non-severe patients of COVID-19**

**(1) CRP**

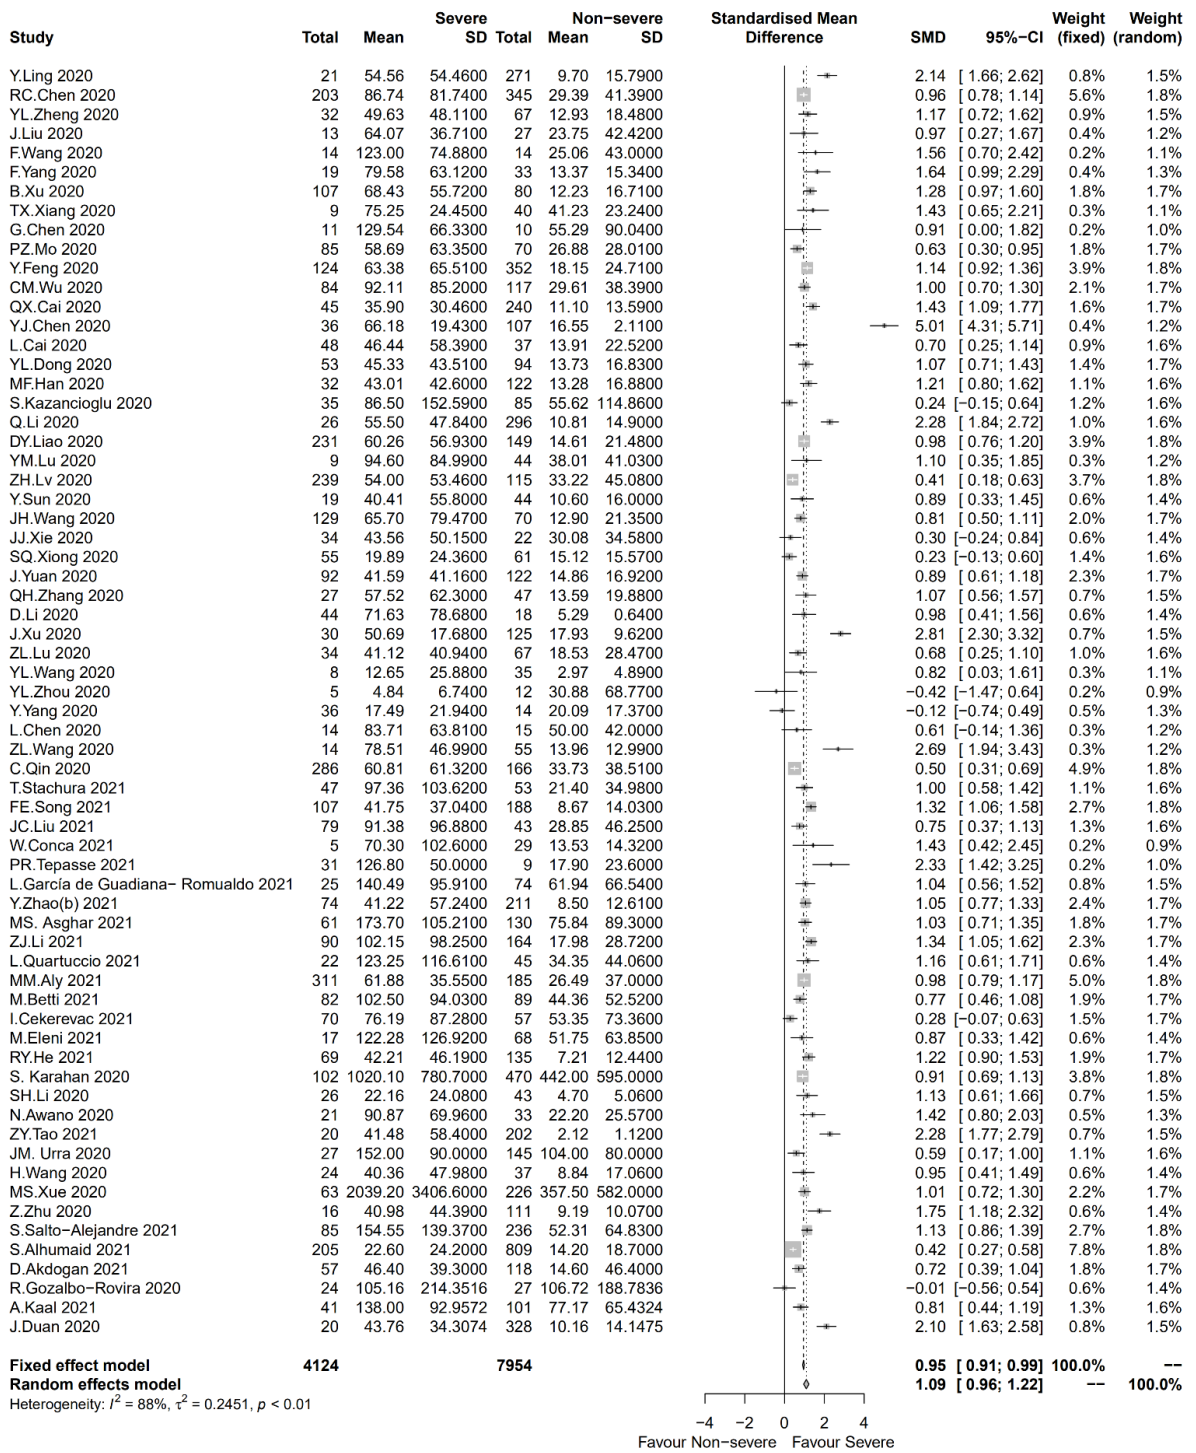

**(2) PCT**

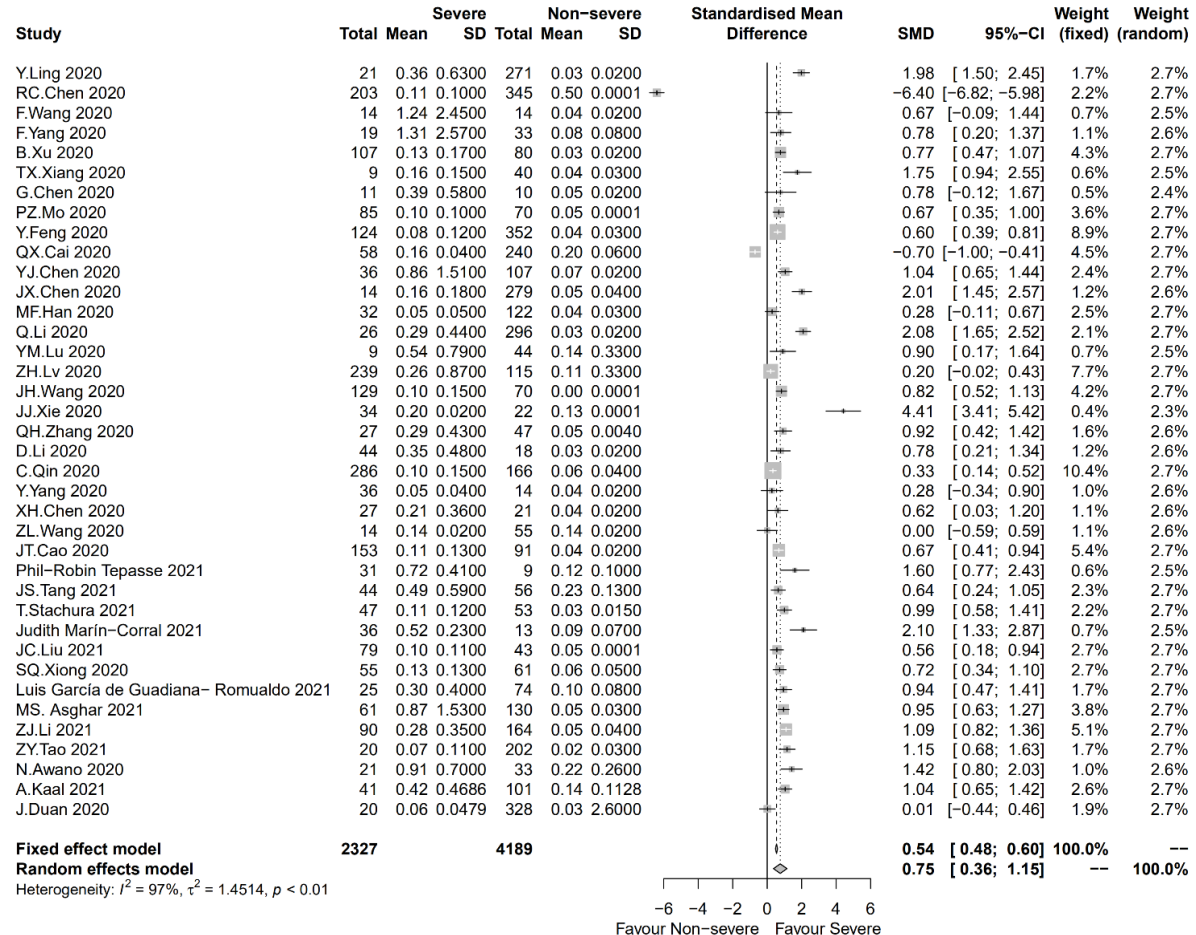

Figure E5 (A) (Continued)

(3) ESR

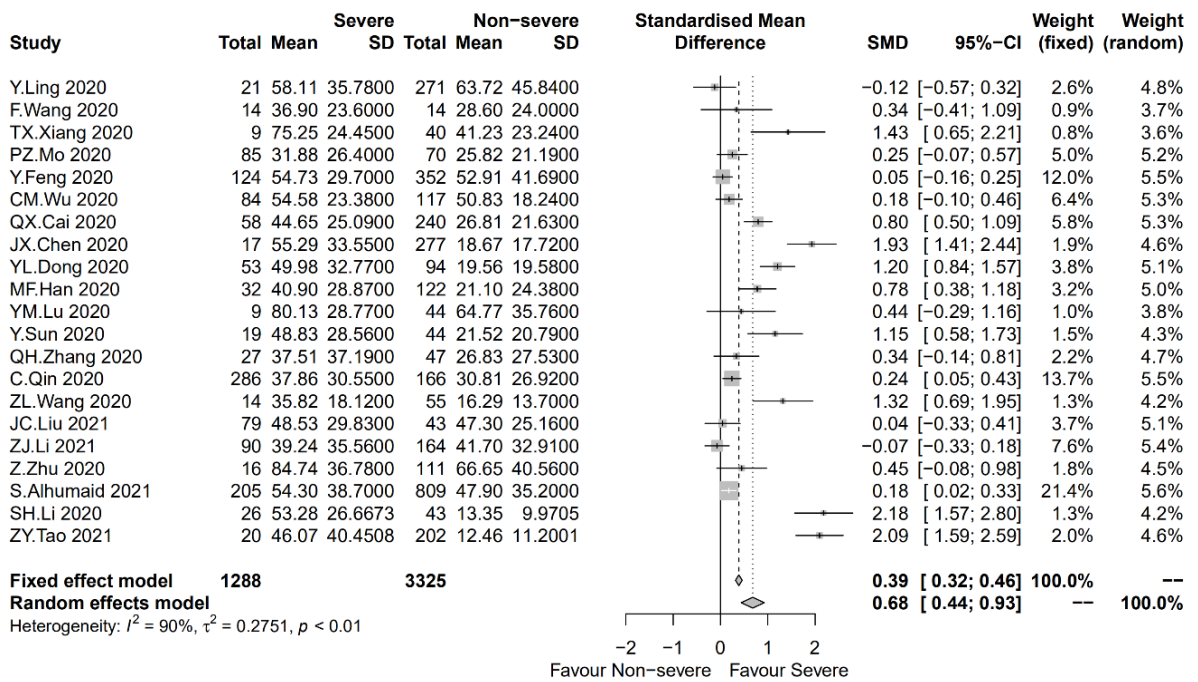

(4) SAA

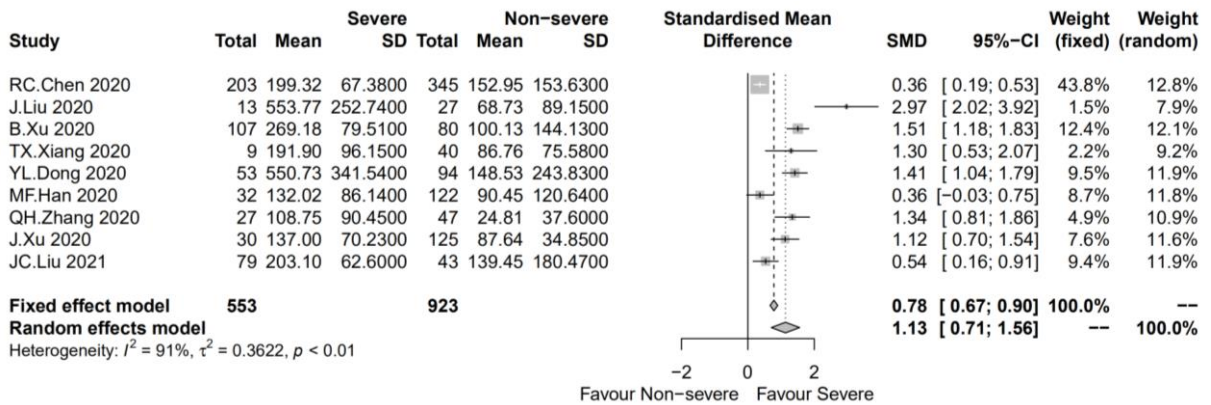

(5) Ferritin

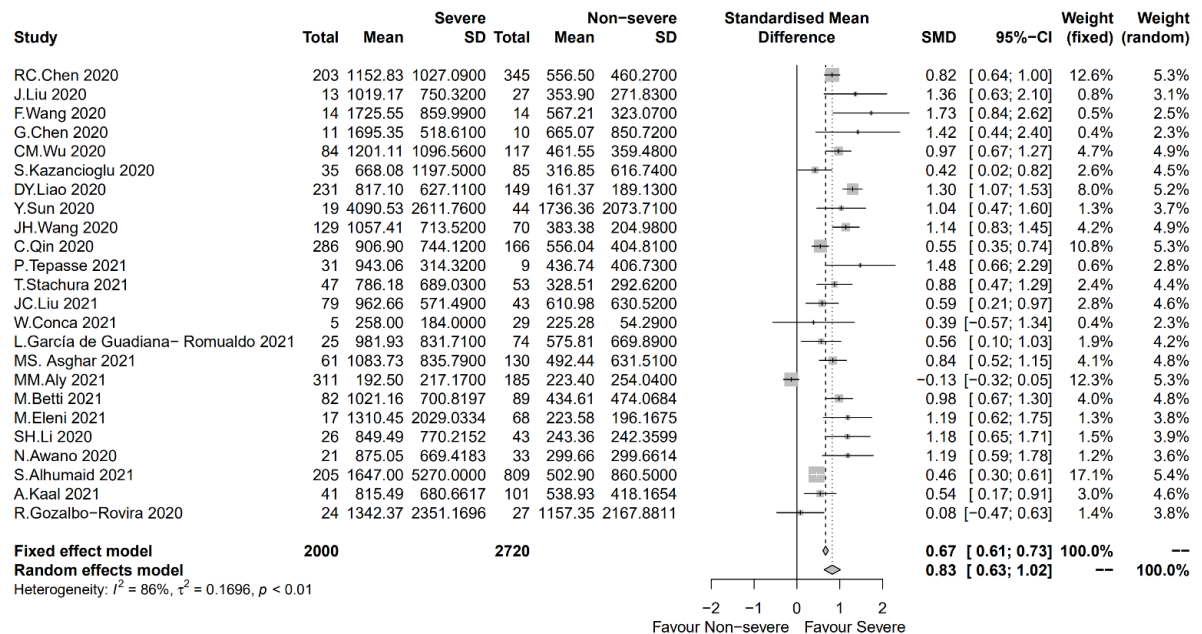

Figure E5 (B) Forest plots of inflammatory parameters in non-survivors and survivors of COVID-19

(1) CRP

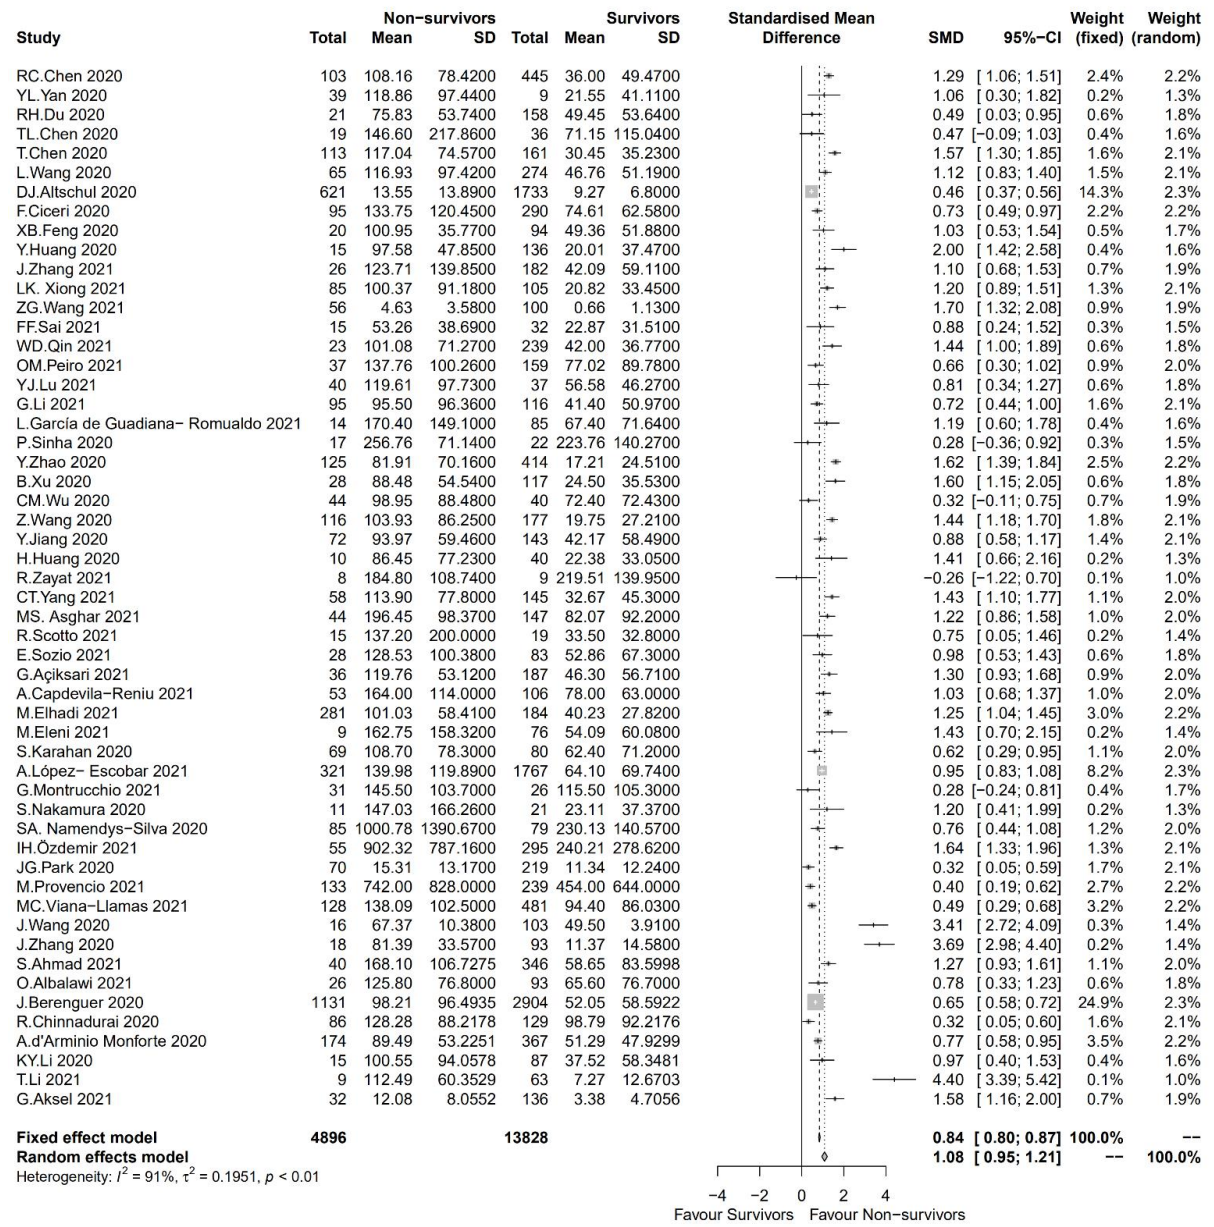

(2) PCT

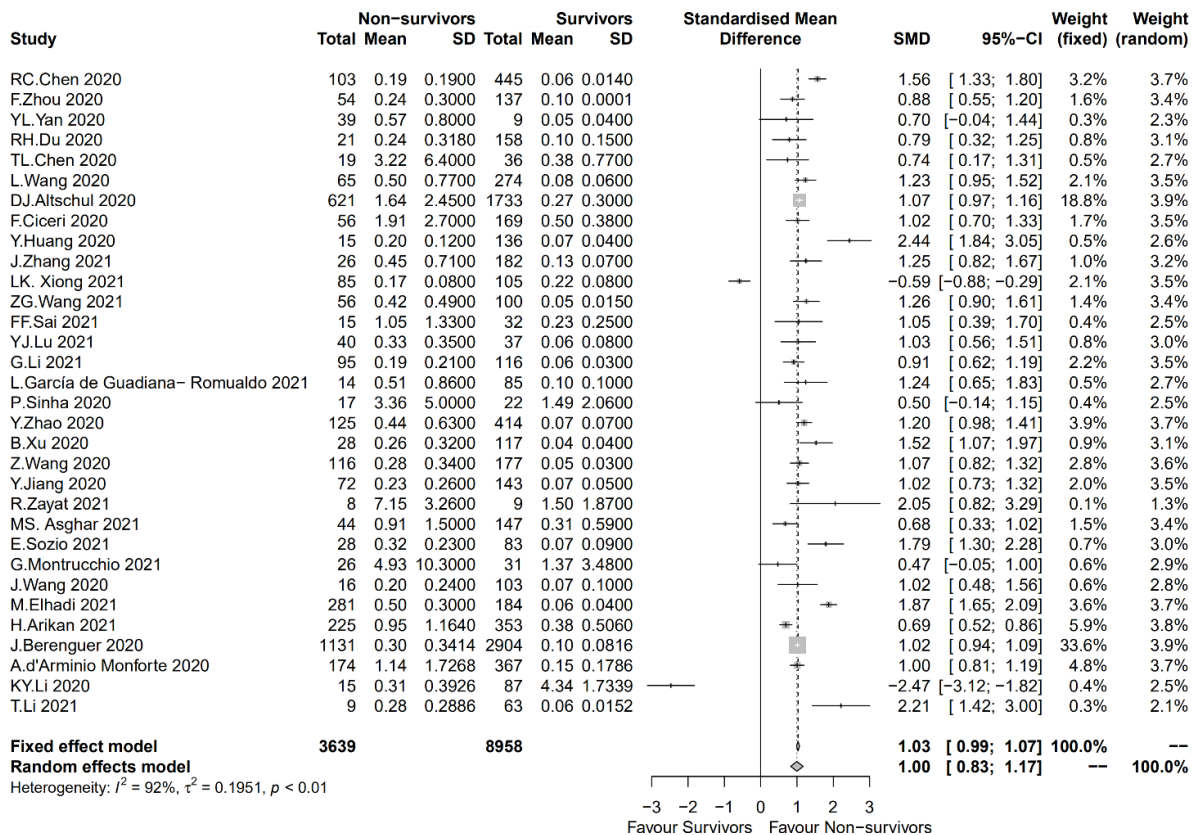

**Figure E5 (B) (Continued)**

**(3) ESR**

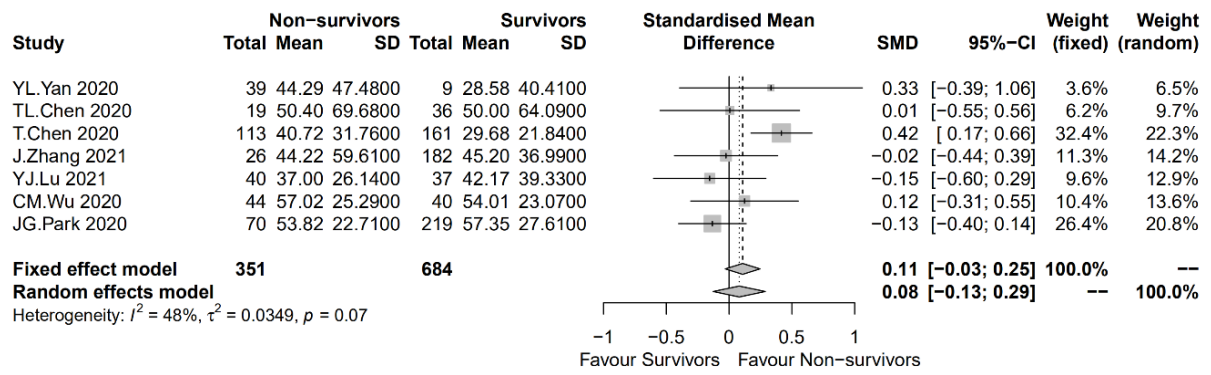

**(4) Ferritin**

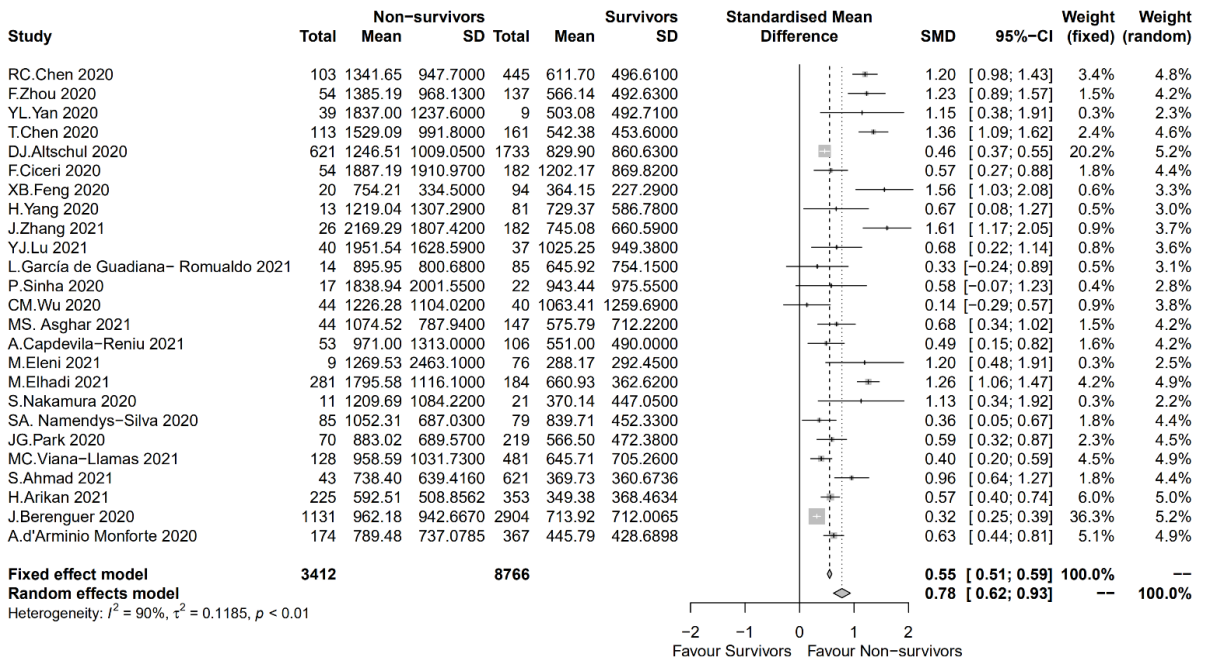

Supplement: 12016_2021_8908_MOESM5_ESM.pdf [file 12016_2021_8908_MOESM5_ESM.pdf]
