# Supplementary material
Source: PubMed Central journal article supplement (PMC8763427)

**Figure E11 (A) Sensitivity analysis of coagulation parameters in severe and non-severe patients of COVID-19**

**(1) PT**

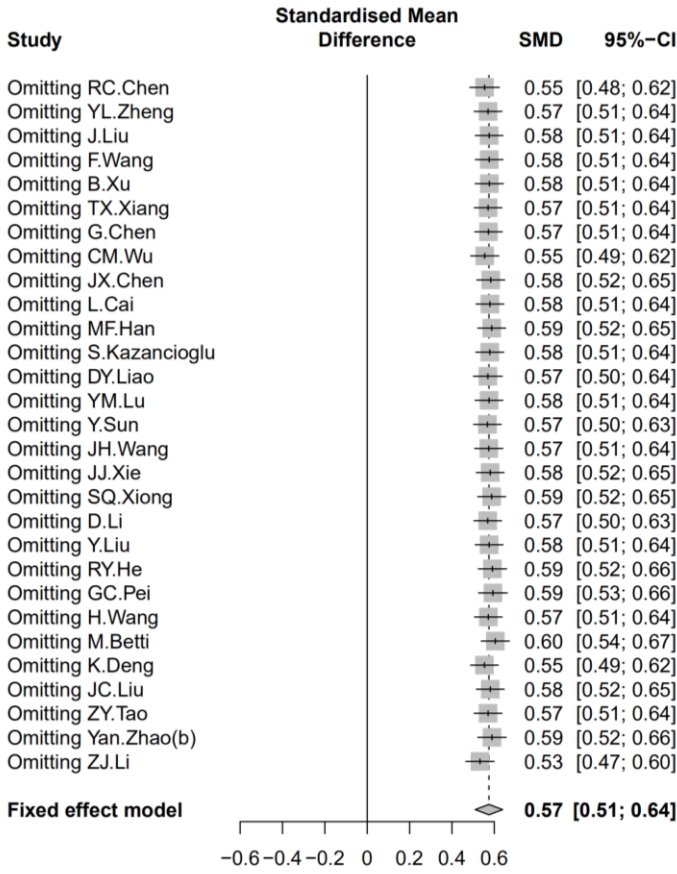

**(2) APTT**

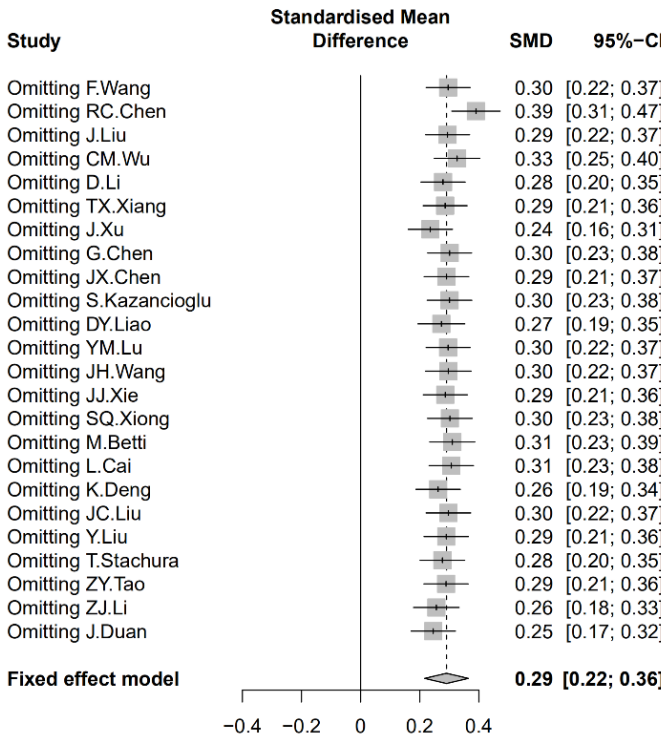

**(3) D-dimer**

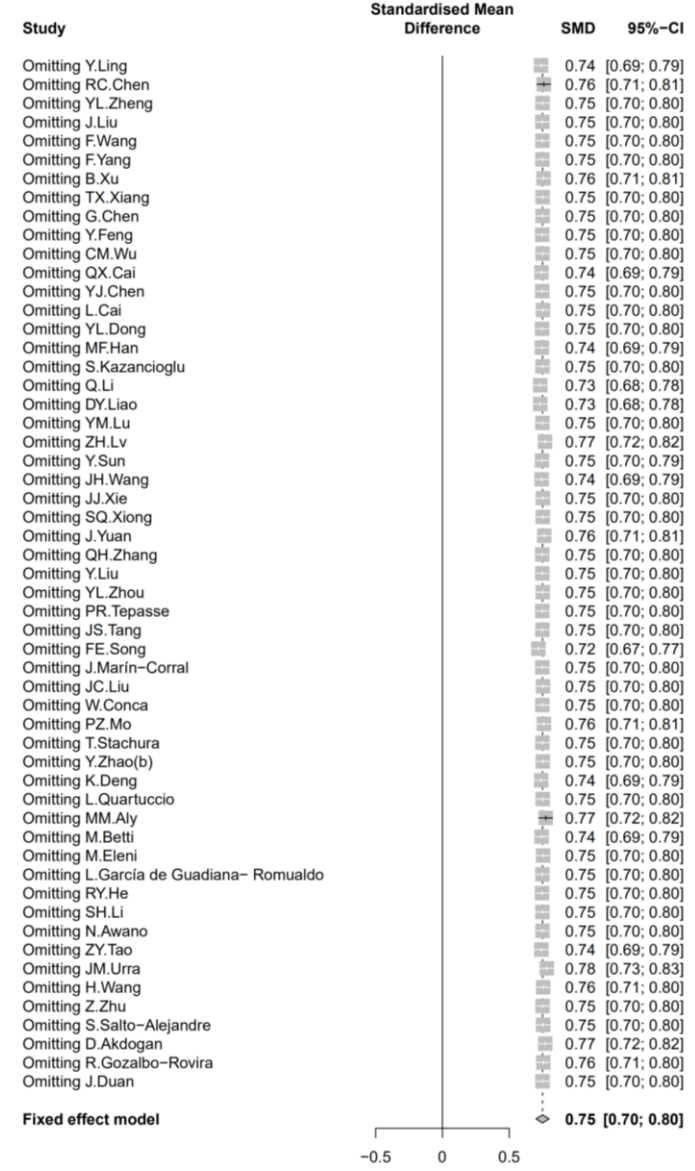

**(4) FIB**

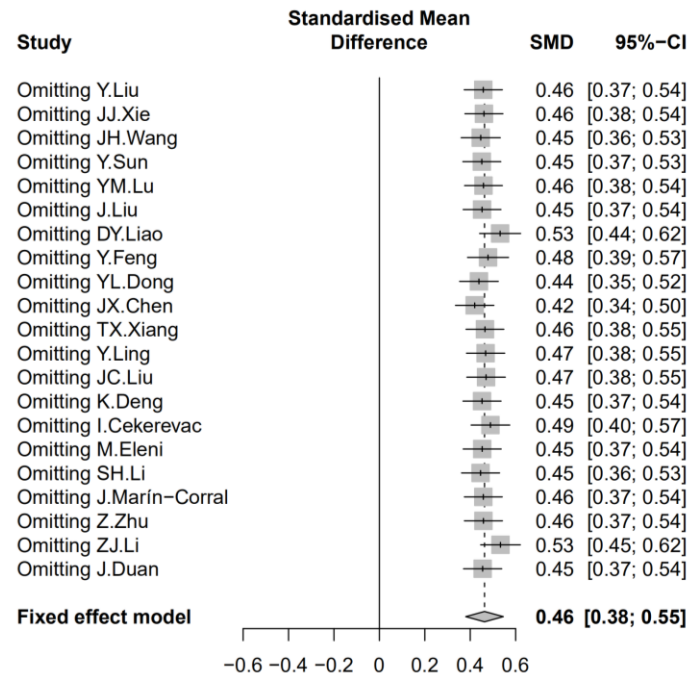

**Figure E11 (B) Sensitivity analysis of coagulation parameters in non-survivors and survivors of COVID-19**

**(1) PT**

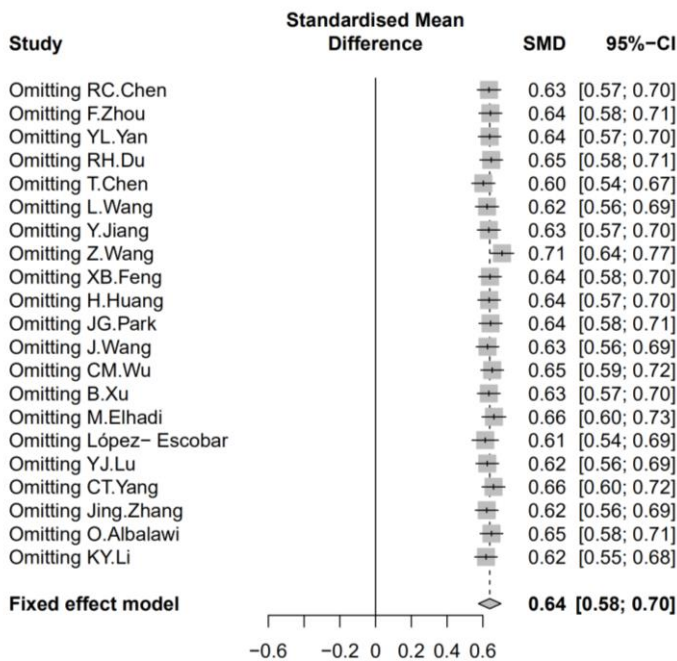

**(4) FIB**

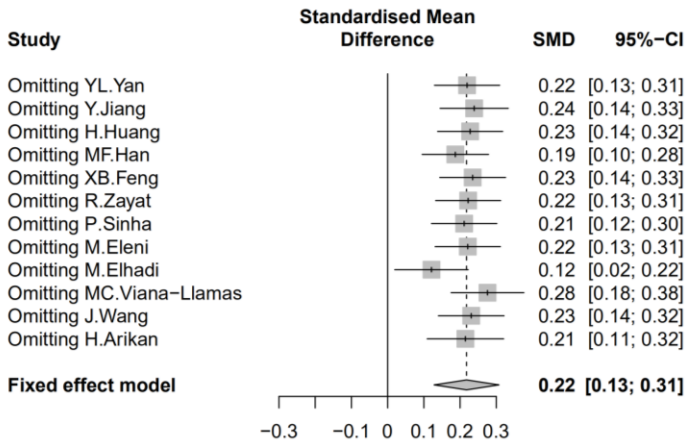

**(2) APTT**

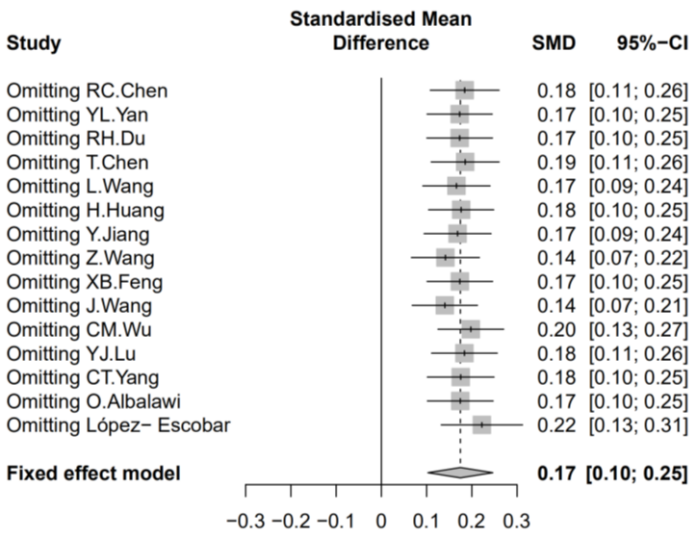

**(3) D-dimer**

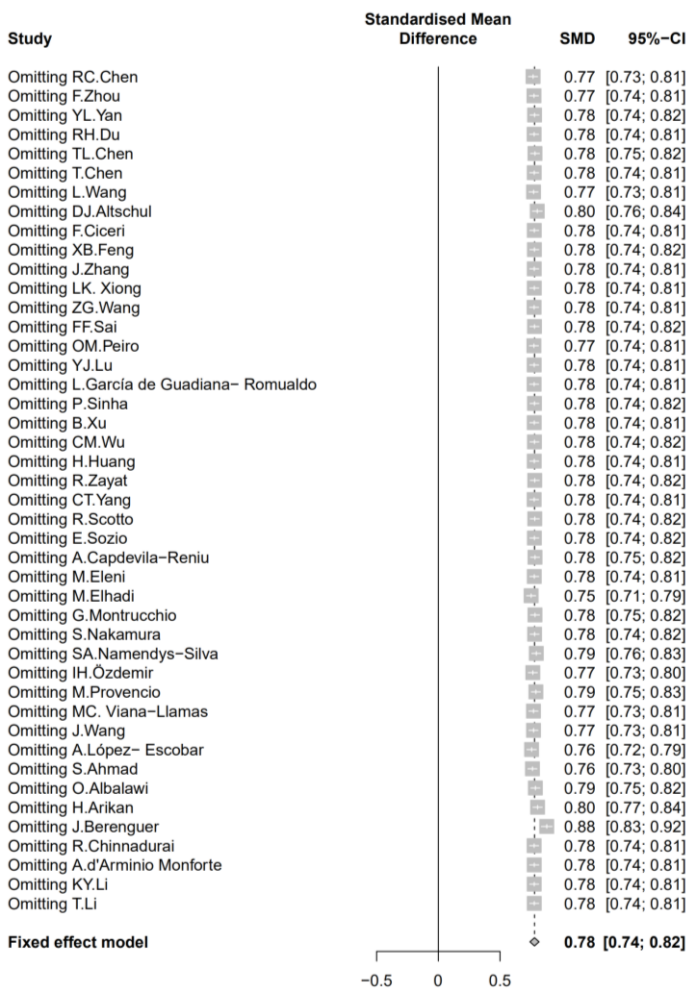

Supplement: 12016_2021_8908_MOESM11_ESM.pdf [file 12016_2021_8908_MOESM11_ESM.pdf]
