# Supplementary material
Source: PubMed Central journal article supplement (PMC8763427)

**Figure E12 (A) Sensitivity analysis of inflammatory parameters in severe and non-severe patients of COVID-19**

**(1) CRP**

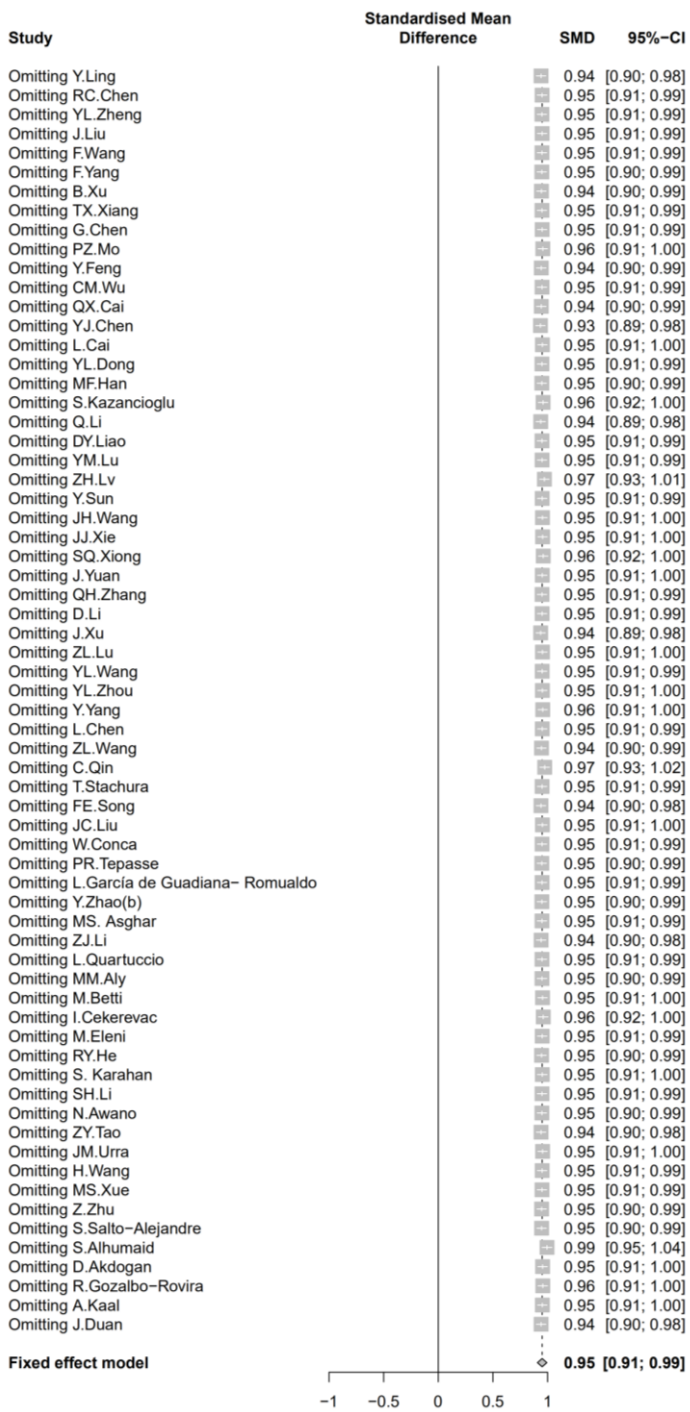

**(2) ESR**

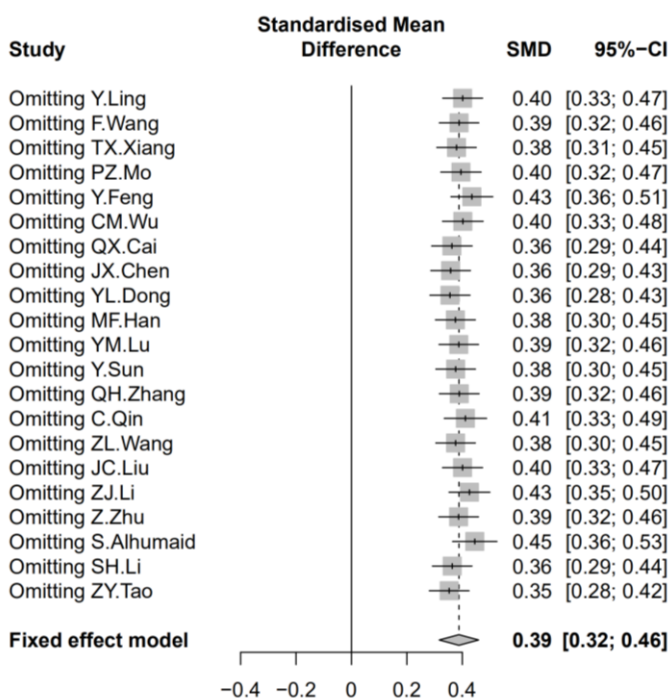

**(3) PCT**

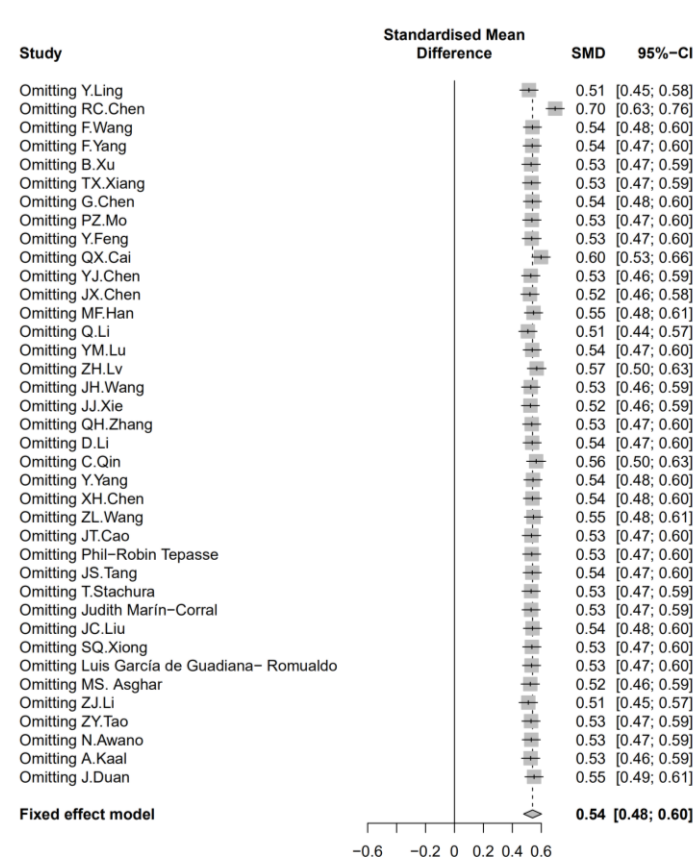

**(4) Ferritin**

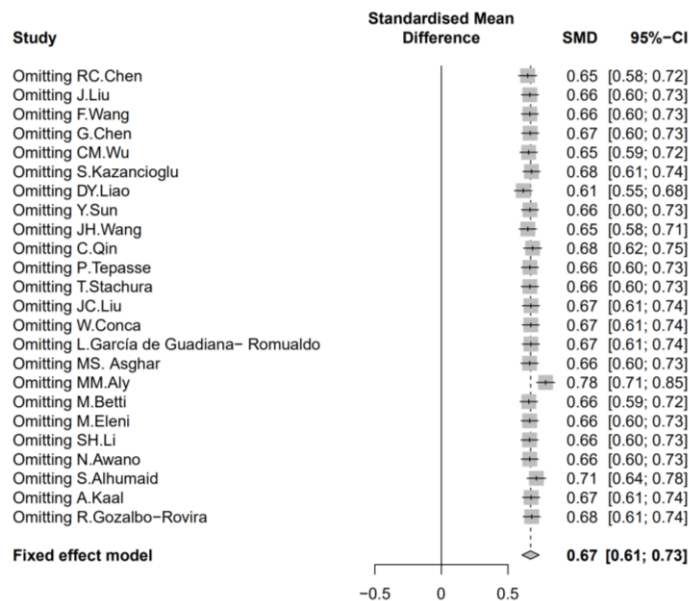

**(5) SAA**

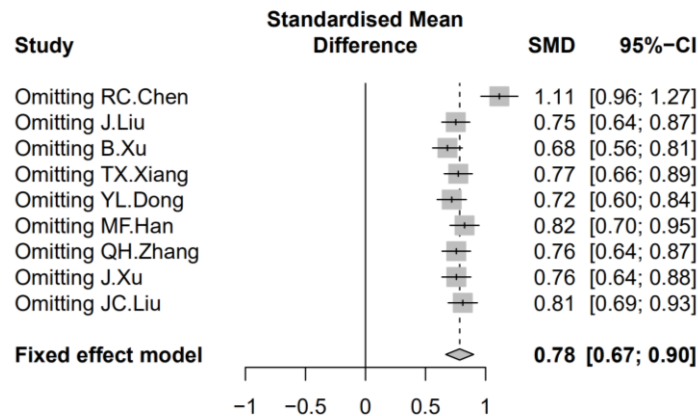

**Figure E12 (B) Sensitivity analysis of inflammatory parameters in non-survivors and survivors of COVID-19**

**(1) CRP**

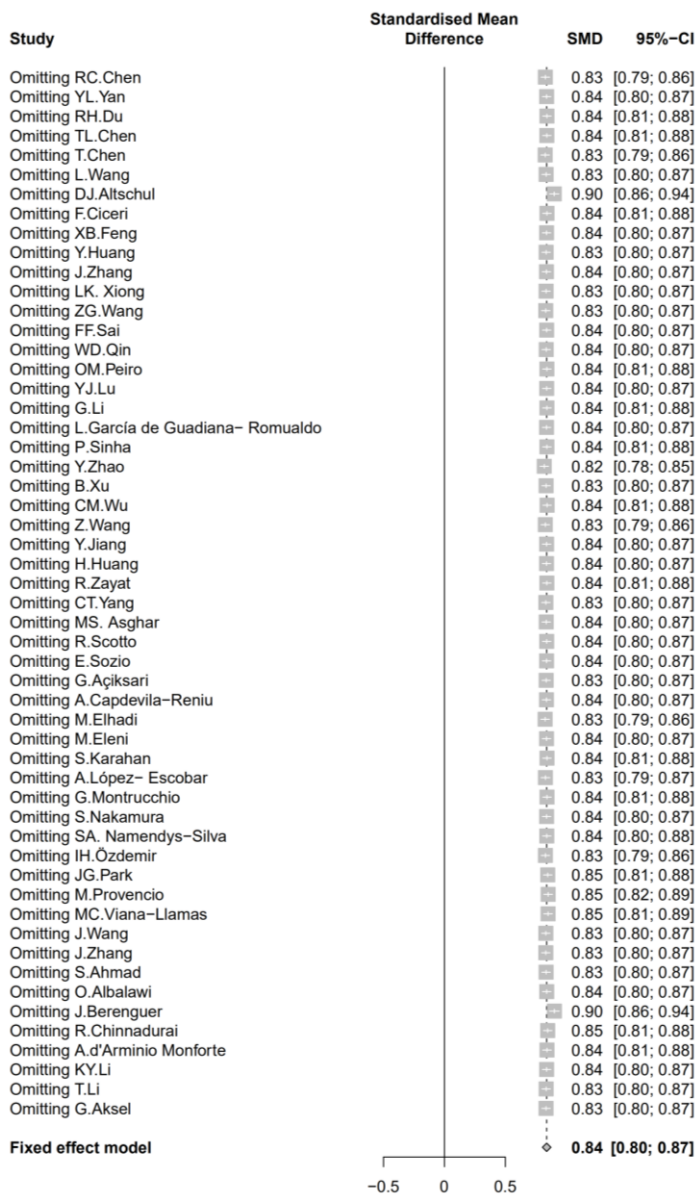

**(4) Ferritin**

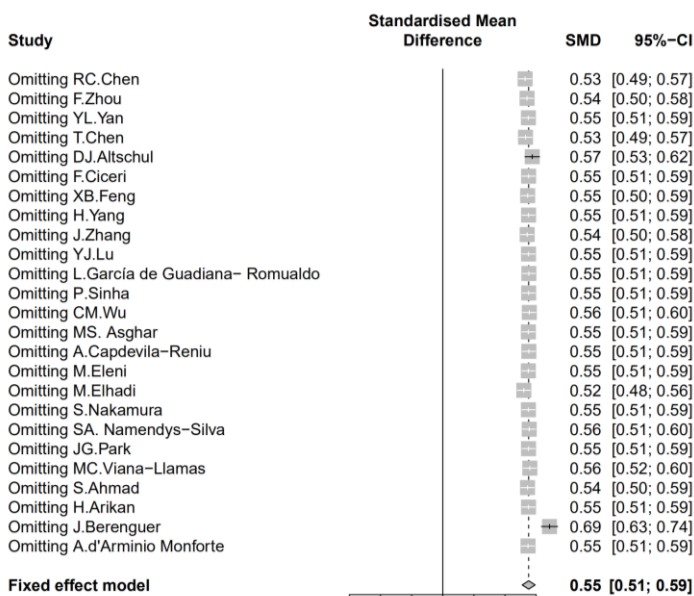

**(2) PCT**

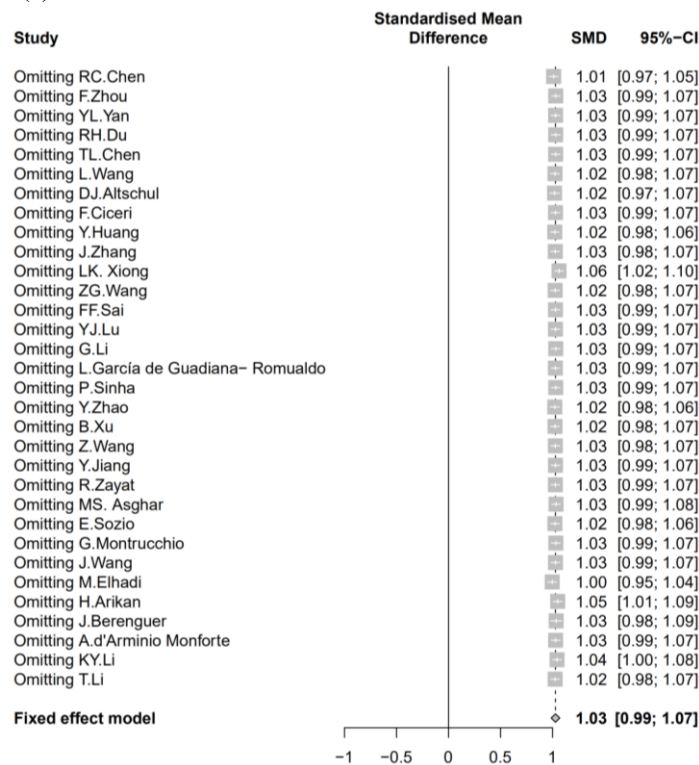

**(3) ESR**

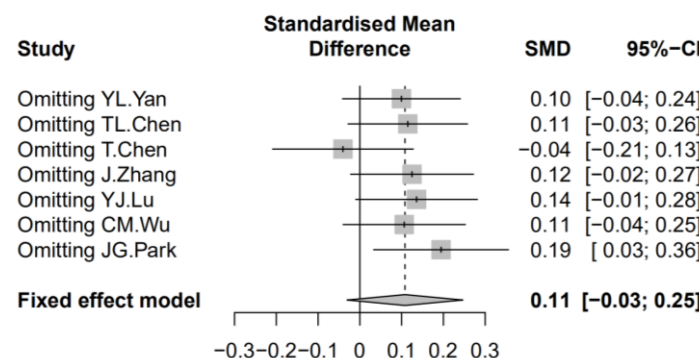

Supplement: 12016_2021_8908_MOESM12_ESM.pdf [file 12016_2021_8908_MOESM12_ESM.pdf]
